# Supplementary material for: RFECS: A Random-Forest Based Algorithm for Enhancer Identification from Chromatin State
Source: PLoS Comput Biol. 2013 Mar 14;9(3):e1002968. doi: 10.1371/journal.pcbi.1002968 (PMC3597546; doi:10.1371/journal.pcbi.1002968)
Supplement: Table S1 — All p300 binding-sites called using MACS in H1 cells (hg19). (XLS) [file pcbi.1002968.s008.xls]

## Sheet: p300_all
Table S1.All p300 binding-sites called by MACS in H1 cells (hg19)
Chromosome	Location
chr1	565140
chr1	877403
chr1	954866
chr1	960203
chr1	976076
chr1	1219569
chr1	1447301
chr1	1503509
chr1	1550689
chr1	1950645
chr1	1981984
chr1	2027233
chr1	2071620
chr1	2179975
chr1	2211002
chr1	2323110
chr1	2344080
chr1	2349261
chr1	2460708
chr1	2477789
chr1	3773950
chr1	4815513
chr1	5286016
chr1	5485076
chr1	5892219
chr1	5957526
chr1	6035457
chr1	6052816
chr1	6101699
chr1	6240409
chr1	6259535
chr1	6265445
chr1	6299613
chr1	6302394
chr1	6445940
chr1	6474607
chr1	6480200
chr1	6550123
chr1	6614656
chr1	6685312
chr1	6761980
chr1	6780299
chr1	7017010
chr1	7358409
chr1	7596395
chr1	8021682
chr1	8035564
chr1	8052049
chr1	8227317
chr1	8257975
chr1	8374543
chr1	8520290
chr1	8849936
chr1	8933716
chr1	8975764
chr1	9218809
chr1	9242424
chr1	9313412
chr1	9380269
chr1	9489083
chr1	9516048
chr1	9551395
chr1	9687300
chr1	9774717
chr1	9821229
chr1	9844804
chr1	9989678
chr1	10003528
chr1	10378411
chr1	10475675
chr1	10579442
chr1	10590055
chr1	10794667
chr1	10896044
chr1	11040458
chr1	11346776
chr1	11397766
chr1	11416516
chr1	11742694
chr1	11785868
chr1	11845397
chr1	11866230
chr1	11919517
chr1	11968294
chr1	12127965
chr1	12139032
chr1	12514219
chr1	12676204
chr1	12689815
chr1	12696691
chr1	12719196
chr1	12777853
chr1	13912424
chr1	14440664
chr1	14463069
chr1	14839944
chr1	14920078
chr1	15068944
chr1	15379963
chr1	15434696
chr1	15516637
chr1	15533365
chr1	15631443
chr1	15711072
chr1	15742945
chr1	15929990
chr1	15943909
chr1	16302296
chr1	16359483
chr1	16442616
chr1	16494379
chr1	16539280
chr1	16563652
chr1	16947723
chr1	16971160
chr1	17019462
chr1	17231281
chr1	17563726
chr1	17704138
chr1	17732843
chr1	17760729
chr1	17796766
chr1	17812025
chr1	17829043
chr1	17877279
chr1	18246618
chr1	18417355
chr1	18560262
chr1	18621455
chr1	18625023
chr1	18807430
chr1	18884640
chr1	18902260
chr1	19008076
chr1	19046795
chr1	19980376
chr1	20042236
chr1	20208825
chr1	20775351
chr1	20849055
chr1	21448654
chr1	21581925
chr1	21596920
chr1	21604822
chr1	21672174
chr1	21836768
chr1	21880131
chr1	21985783
chr1	22033240
chr1	22271113
chr1	22555892
chr1	22572562
chr1	22591557
chr1	22647331
chr1	23132411
chr1	23345851
chr1	23589952
chr1	23591516
chr1	23670763
chr1	23684301
chr1	23697555
chr1	23866504
chr1	23881434
chr1	23888981
chr1	23894669
chr1	23925140
chr1	24117483
chr1	24329911
chr1	24477145
chr1	24513922
chr1	24613478
chr1	24635076
chr1	24664841
chr1	24961932
chr1	25052075
chr1	25066576
chr1	25071600
chr1	25130978
chr1	25227918
chr1	25260962
chr1	25935328
chr1	26033939
chr1	26107052
chr1	26137550
chr1	26232919
chr1	26254317
chr1	26282989
chr1	26324830
chr1	26481471
chr1	26503933
chr1	26560387
chr1	26617055
chr1	26648243
chr1	26655324
chr1	26690463
chr1	26736854
chr1	26745688
chr1	26756512
chr1	26758744
chr1	27165416
chr1	27286957
chr1	27326137
chr1	27333724
chr1	27429409
chr1	27434109
chr1	27481599
chr1	27561118
chr1	27648567
chr1	27715100
chr1	27746928
chr1	27756583
chr1	27823378
chr1	27933981
chr1	27989863
chr1	28134091
chr1	28261453
chr1	28473909
chr1	28655589
chr1	28726457
chr1	28879550
chr1	28918864
chr1	28929552
chr1	28969718
chr1	28975189
chr1	28995408
chr1	29015246
chr1	29451345
chr1	29508722
chr1	29529534
chr1	29575896
chr1	29598446
chr1	29658921
chr1	29706245
chr1	29828360
chr1	29839994
chr1	30447383
chr1	31317817
chr1	31628236
chr1	31643813
chr1	31658731
chr1	31846682
chr1	32029888
chr1	32059757
chr1	32472839
chr1	32671134
chr1	32714005
chr1	32816784
chr1	32860344
chr1	32903878
chr1	32966713
chr1	33098556
chr1	33178010
chr1	33202545
chr1	33225874
chr1	33232407
chr1	33283017
chr1	33446379
chr1	33450147
chr1	33618824
chr1	33808140
chr1	34314081
chr1	34654270
chr1	35063690
chr1	35318465
chr1	35544819
chr1	35856929
chr1	36168101
chr1	36235888
chr1	36348714
chr1	36351877
chr1	36554491
chr1	36615335
chr1	36653985
chr1	36839574
chr1	36930136
chr1	37041873
chr1	37169511
chr1	37176764
chr1	37237034
chr1	37486475
chr1	37700812
chr1	37731946
chr1	38412786
chr1	38455780
chr1	38461952
chr1	38475096
chr1	38648977
chr1	38736301
chr1	38751761
chr1	38758091
chr1	38955672
chr1	38968663
chr1	39269888
chr1	39284594
chr1	39301137
chr1	39456643
chr1	39467400
chr1	39607855
chr1	39636607
chr1	39696441
chr1	39844147
chr1	40265696
chr1	40359048
chr1	40364072
chr1	40388267
chr1	40439330
chr1	40498169
chr1	40562891
chr1	40627075
chr1	40723677
chr1	40804542
chr1	41134184
chr1	41418349
chr1	41707856
chr1	41837599
chr1	41873633
chr1	41952443
chr1	42289394
chr1	42800980
chr1	42990222
chr1	43232922
chr1	43424611
chr1	43474598
chr1	43535792
chr1	43557165
chr1	43573251
chr1	43609449
chr1	43693070
chr1	43703986
chr1	43997929
chr1	44016087
chr1	44126270
chr1	44173465
chr1	44412123
chr1	44457372
chr1	44679095
chr1	44784238
chr1	44805588
chr1	44883390
chr1	44973399
chr1	45009132
chr1	45205564
chr1	45285456
chr1	45309097
chr1	45452358
chr1	45956885
chr1	45987705
chr1	46016842
chr1	46124690
chr1	46392224
chr1	46502948
chr1	46509669
chr1	46599003
chr1	46914089
chr1	46932477
chr1	46951776
chr1	46983007
chr1	46991200
chr1	47079657
chr1	47645051
chr1	47674282
chr1	47889512
chr1	48191000
chr1	48251406
chr1	48363947
chr1	48430884
chr1	48449611
chr1	48463398
chr1	48471368
chr1	48509432
chr1	48992042
chr1	49176282
chr1	51166024
chr1	51425898
chr1	51702073
chr1	51762624
chr1	52035354
chr1	52344433
chr1	52814494
chr1	53125901
chr1	53145057
chr1	53152095
chr1	53638404
chr1	53686028
chr1	53704233
chr1	53896789
chr1	53900879
chr1	54171349
chr1	54776019
chr1	54954167
chr1	55181522
chr1	55279361
chr1	55410956
chr1	55428419
chr1	55487926
chr1	56662609
chr1	56836394
chr1	56902935
chr1	56919132
chr1	57001163
chr1	57009683
chr1	57015994
chr1	57032914
chr1	57042977
chr1	57286910
chr1	57514668
chr1	57668160
chr1	57671827
chr1	58066279
chr1	58453398
chr1	58469091
chr1	58472482
chr1	58497302
chr1	58497835
chr1	58623943
chr1	58857998
chr1	59250002
chr1	59538548
chr1	59544114
chr1	59550116
chr1	59582701
chr1	59609717
chr1	59690163
chr1	59850183
chr1	59971401
chr1	60144003
chr1	60165173
chr1	60185808
chr1	60225301
chr1	60366530
chr1	60463339
chr1	61378039
chr1	61471463
chr1	61714293
chr1	61750134
chr1	61762163
chr1	61918926
chr1	62524959
chr1	62642680
chr1	62647421
chr1	62664236
chr1	62953857
chr1	63655533
chr1	63664921
chr1	63760610
chr1	63765204
chr1	63770896
chr1	63796472
chr1	63988922
chr1	64023330
chr1	64157816
chr1	64197031
chr1	64241038
chr1	64248836
chr1	64255310
chr1	64270720
chr1	64283597
chr1	64527152
chr1	64541943
chr1	64602944
chr1	64612619
chr1	64938833
chr1	64959816
chr1	64963361
chr1	64971303
chr1	64979420
chr1	64984612
chr1	65108918
chr1	65290079
chr1	65379748
chr1	65432037
chr1	65615253
chr1	65744958
chr1	66153546
chr1	66469604
chr1	66807495
chr1	66816082
chr1	67018135
chr1	67563148
chr1	67615083
chr1	67808070
chr1	67865081
chr1	67924905
chr1	67981520
chr1	68021327
chr1	68215377
chr1	68319512
chr1	68683030
chr1	68699060
chr1	68742351
chr1	68759953
chr1	69443085
chr1	69543587
chr1	69696626
chr1	69710133
chr1	70218342
chr1	70400218
chr1	71053699
chr1	71928149
chr1	72489182
chr1	73013250
chr1	73136799
chr1	73499555
chr1	73531442
chr1	74396302
chr1	74415283
chr1	74711076
chr1	75540602
chr1	75549090
chr1	75601577
chr1	76095815
chr1	76185732
chr1	76251975
chr1	76518828
chr1	76696765
chr1	76716167
chr1	76967461
chr1	77049092
chr1	77223584
chr1	77437034
chr1	77731047
chr1	77980322
chr1	78136723
chr1	78437918
chr1	79659297
chr1	79728564
chr1	80647247
chr1	80923327
chr1	80999833
chr1	81070403
chr1	81610192
chr1	81622891
chr1	81704120
chr1	81771765
chr1	81778378
chr1	81815286
chr1	81843287
chr1	82013466
chr1	82130226
chr1	82148272
chr1	82246575
chr1	82263626
chr1	82314750
chr1	82444776
chr1	82795157
chr1	82951589
chr1	83313937
chr1	84158788
chr1	84326215
chr1	84436693
chr1	84569090
chr1	85230051
chr1	85248408
chr1	85410873
chr1	85508306
chr1	85667462
chr1	85859305
chr1	85940222
chr1	85987393
chr1	86050102
chr1	86073142
chr1	86661131
chr1	87597678
chr1	87666825
chr1	87797152
chr1	88329230
chr1	88600368
chr1	88601466
chr1	89240181
chr1	89996430
chr1	90376649
chr1	90384346
chr1	90398694
chr1	90460658
chr1	91027717
chr1	91274849
chr1	91392703
chr1	91487666
chr1	91570563
chr1	91586222
chr1	91589421
chr1	91711176
chr1	91748478
chr1	91852898
chr1	91966978
chr1	92012689
chr1	92030715
chr1	92083252
chr1	92097711
chr1	92110753
chr1	92256922
chr1	92545697
chr1	93258105
chr1	93544719
chr1	93811386
chr1	93876779
chr1	94059843
chr1	94102016
chr1	94146493
chr1	94273133
chr1	94279765
chr1	94354741
chr1	94385538
chr1	94444320
chr1	94511476
chr1	94729849
chr1	94994101
chr1	95126712
chr1	95132541
chr1	95154329
chr1	95360447
chr1	95699735
chr1	95873723
chr1	95970834
chr1	95984088
chr1	96469376
chr1	96672070
chr1	96725259
chr1	96929882
chr1	96941102
chr1	96988207
chr1	97046688
chr1	97311388
chr1	97516217
chr1	97518607
chr1	97580580
chr1	98336349
chr1	98552813
chr1	98968773
chr1	100315685
chr1	100770729
chr1	100928201
chr1	101754026
chr1	101823103
chr1	101830759
chr1	102119478
chr1	102179552
chr1	102285858
chr1	102308932
chr1	102573299
chr1	103241838
chr1	105300636
chr1	106632404
chr1	107066228
chr1	107253075
chr1	107724131
chr1	107819840
chr1	107974893
chr1	108066620
chr1	108113123
chr1	108232050
chr1	108293165
chr1	108410330
chr1	108475875
chr1	108668298
chr1	109076369
chr1	109490678
chr1	109757630
chr1	109772541
chr1	109780323
chr1	110036682
chr1	110183066
chr1	110316432
chr1	110415921
chr1	110466254
chr1	110473922
chr1	110503154
chr1	111765694
chr1	112024505
chr1	112290056
chr1	112298178
chr1	112549983
chr1	113337703
chr1	113352045
chr1	113360775
chr1	113392401
chr1	113454364
chr1	113498934
chr1	113570409
chr1	113584996
chr1	113797719
chr1	114355124
chr1	114447897
chr1	114472233
chr1	114566804
chr1	114576114
chr1	114577686
chr1	114580663
chr1	114592868
chr1	114618531
chr1	114825667
chr1	114828938
chr1	114889322
chr1	116260332
chr1	116512345
chr1	116681805
chr1	116695002
chr1	117396709
chr1	117403989
chr1	117714845
chr1	117811826
chr1	117889328
chr1	117909966
chr1	118793133
chr1	119503030
chr1	119527149
chr1	120286940
chr1	121485041
chr1	144534152
chr1	144913867
chr1	145039858
chr1	145092688
chr1	145112996
chr1	145382995
chr1	145438432
chr1	145611010
chr1	146808269
chr1	147013280
chr1	147039899
chr1	147196277
chr1	147309526
chr1	147735874
chr1	147806705
chr1	149223911
chr1	149889440
chr1	150022759
chr1	150135875
chr1	150228938
chr1	150266195
chr1	150540825
chr1	150577393
chr1	150997237
chr1	151032830
chr1	151162697
chr1	151227251
chr1	151267677
chr1	151319488
chr1	151707718
chr1	151833504
chr1	151882055
chr1	153095562
chr1	153517716
chr1	153571509
chr1	153606434
chr1	153718112
chr1	153963302
chr1	154244730
chr1	154600496
chr1	154851117
chr1	154909519
chr1	154955489
chr1	155057348
chr1	155166193
chr1	155188880
chr1	155243533
chr1	155278649
chr1	155830442
chr1	155904219
chr1	156030808
chr1	156031386
chr1	156060711
chr1	156119894
chr1	156163761
chr1	156186430
chr1	156195412
chr1	156391552
chr1	156409602
chr1	156475268
chr1	156542310
chr1	156554767
chr1	156578045
chr1	156643699
chr1	156662918
chr1	156717175
chr1	156721738
chr1	156836339
chr1	156860110
chr1	156945050
chr1	157015842
chr1	157039726
chr1	157211139
chr1	157243499
chr1	157296671
chr1	157536397
chr1	158047480
chr1	158073897
chr1	158088004
chr1	158095025
chr1	158119448
chr1	158392302
chr1	158476380
chr1	158969588
chr1	158976630
chr1	159059189
chr1	159189271
chr1	159861550
chr1	159906413
chr1	160018375
chr1	160079346
chr1	160132291
chr1	160139542
chr1	160163112
chr1	160227314
chr1	160370263
chr1	160642084
chr1	160951541
chr1	160988418
chr1	161015850
chr1	161102113
chr1	161123907
chr1	161276135
chr1	161720341
chr1	161878937
chr1	162006959
chr1	162061996
chr1	162114833
chr1	162117725
chr1	162200106
chr1	162218963
chr1	162531174
chr1	162861595
chr1	163173205
chr1	163291600
chr1	163369936
chr1	163531729
chr1	163566867
chr1	163587790
chr1	164209622
chr1	164571416
chr1	164574678
chr1	164756820
chr1	164872047
chr1	165377887
chr1	166497221
chr1	166879849
chr1	166919593
chr1	167036068
chr1	167091391
chr1	167189511
chr1	167298694
chr1	167399888
chr1	167604779
chr1	167674693
chr1	167739562
chr1	167772730
chr1	167831429
chr1	168115385
chr1	168195206
chr1	169257447
chr1	169317898
chr1	169337170
chr1	169498745
chr1	169750714
chr1	169862947
chr1	170115312
chr1	170384758
chr1	170456999
chr1	170473102
chr1	171182877
chr1	171189893
chr1	171196089
chr1	171267971
chr1	171283117
chr1	171401297
chr1	171454908
chr1	171610684
chr1	171624844
chr1	171879171
chr1	172247815
chr1	172329839
chr1	172360473
chr1	172445543
chr1	173369668
chr1	173684106
chr1	174768940
chr1	174841209
chr1	174992563
chr1	174999076
chr1	175099640
chr1	175766928
chr1	175777985
chr1	175891694
chr1	176608517
chr1	177013766
chr1	177763948
chr1	178001135
chr1	178030545
chr1	178252744
chr1	179498793
chr1	180208860
chr1	180323309
chr1	180490836
chr1	180748206
chr1	181135769
chr1	181473622
chr1	181578315
chr1	181906300
chr1	181939226
chr1	182070735
chr1	182585543
chr1	182631897
chr1	182775579
chr1	182927190
chr1	183203990
chr1	183290466
chr1	183300794
chr1	183372930
chr1	183592591
chr1	183840572
chr1	183914790
chr1	184037656
chr1	184167069
chr1	184191753
chr1	184353129
chr1	184450042
chr1	184467283
chr1	184638803
chr1	184665726
chr1	185125899
chr1	185501139
chr1	185514399
chr1	185615675
chr1	185703451
chr1	185720270
chr1	185812678
chr1	185881855
chr1	186181936
chr1	186470146
chr1	187016614
chr1	187594206
chr1	188058799
chr1	190108006
chr1	191571364
chr1	191876571
chr1	193074725
chr1	193557751
chr1	193710572
chr1	194238211
chr1	196003458
chr1	196234292
chr1	196275762
chr1	196287271
chr1	196343138
chr1	196577690
chr1	197409020
chr1	197564587
chr1	197745098
chr1	197780125
chr1	197783634
chr1	198671080
chr1	198711107
chr1	199281230
chr1	199432853
chr1	200017589
chr1	200045463
chr1	200050802
chr1	200195541
chr1	200333751
chr1	200343338
chr1	200361099
chr1	200458031
chr1	200589940
chr1	200635151
chr1	200885477
chr1	201316996
chr1	201345810
chr1	201438382
chr1	201481263
chr1	201762364
chr1	201977472
chr1	202071128
chr1	202088281
chr1	202104502
chr1	202113928
chr1	202124176
chr1	202206418
chr1	202284903
chr1	202291637
chr1	202331063
chr1	202537052
chr1	202613085
chr1	202777605
chr1	202896439
chr1	202936437
chr1	202968589
chr1	203023981
chr1	203087047
chr1	203488728
chr1	203518603
chr1	203830630
chr1	203954385
chr1	203965422
chr1	203965977
chr1	204034630
chr1	204049352
chr1	204053684
chr1	204063575
chr1	204072641
chr1	204077976
chr1	204098352
chr1	204131808
chr1	204224542
chr1	204273330
chr1	204320238
chr1	204367877
chr1	204381150
chr1	204424260
chr1	204534982
chr1	204616867
chr1	204621220
chr1	204680062
chr1	204684128
chr1	204733118
chr1	204768381
chr1	204893389
chr1	205091450
chr1	205160913
chr1	205180902
chr1	205263908
chr1	205270757
chr1	205283353
chr1	205304942
chr1	205414226
chr1	205417842
chr1	205420552
chr1	205626903
chr1	205628239
chr1	205640020
chr1	205718837
chr1	205744530
chr1	206223818
chr1	207226412
chr1	208250609
chr1	208267308
chr1	208842501
chr1	208955195
chr1	208961671
chr1	209008727
chr1	209373398
chr1	209393104
chr1	209579004
chr1	209606811
chr1	209729756
chr1	209750317
chr1	209820302
chr1	209921172
chr1	209957986
chr1	209979687
chr1	210073515
chr1	210291358
chr1	210425013
chr1	210432978
chr1	210446422
chr1	210484580
chr1	210532316
chr1	210547376
chr1	210574161
chr1	210580799
chr1	210589750
chr1	211551056
chr1	211643430
chr1	211752367
chr1	211828747
chr1	211849351
chr1	211872026
chr1	212208523
chr1	212279749
chr1	212300696
chr1	212483524
chr1	212723216
chr1	212965207
chr1	213083226
chr1	213088314
chr1	213102510
chr1	213405424
chr1	213418215
chr1	213681320
chr1	213843998
chr1	214189596
chr1	214200600
chr1	214463408
chr1	214490048
chr1	214502382
chr1	214578059
chr1	214620280
chr1	214626284
chr1	214687511
chr1	214694317
chr1	214857210
chr1	215220573
chr1	215436104
chr1	215740649
chr1	215941297
chr1	216268973
chr1	216314661
chr1	216356588
chr1	216562170
chr1	216861687
chr1	216913823
chr1	216923611
chr1	218208003
chr1	218373503
chr1	218458696
chr1	218474799
chr1	218633556
chr1	218668075
chr1	218848032
chr1	219438080
chr1	219728778
chr1	220220055
chr1	220267549
chr1	220326700
chr1	220463798
chr1	220512395
chr1	221213226
chr1	221343034
chr1	221402219
chr1	221555781
chr1	221581673
chr1	221608971
chr1	221889074
chr1	222182585
chr1	222817614
chr1	222910063
chr1	223196162
chr1	223204093
chr1	223348539
chr1	223493398
chr1	224310397
chr1	224352569
chr1	224357791
chr1	224423978
chr1	224528905
chr1	224690612
chr1	224701620
chr1	224891854
chr1	224988649
chr1	225566874
chr1	225840975
chr1	225934677
chr1	225960247
chr1	226087179
chr1	226133518
chr1	226138982
chr1	226250259
chr1	226299907
chr1	226398647
chr1	226411685
chr1	226541242
chr1	226592806
chr1	226640199
chr1	226700365
chr1	226708462
chr1	226868036
chr1	226891397
chr1	227015934
chr1	227660279
chr1	227923157
chr1	227981737
chr1	228297042
chr1	228353292
chr1	228662553
chr1	228985120
chr1	228989159
chr1	229163866
chr1	229198448
chr1	229229911
chr1	229366569
chr1	229532795
chr1	229694830
chr1	229761575
chr1	230303284
chr1	230413358
chr1	230654447
chr1	231319872
chr1	231377013
chr1	231473815
chr1	231686118
chr1	231942606
chr1	231992419
chr1	232119396
chr1	232246813
chr1	232260255
chr1	232388815
chr1	232416867
chr1	232608655
chr1	232684806
chr1	232941125
chr1	233425622
chr1	233431371
chr1	233658987
chr1	233724282
chr1	234040337
chr1	234645873
chr1	234880078
chr1	235049643
chr1	235122381
chr1	235242944
chr1	235247276
chr1	235253890
chr1	235387569
chr1	236030340
chr1	236634378
chr1	236650646
chr1	237180279
chr1	237195555
chr1	237205432
chr1	237275315
chr1	237411600
chr1	237443008
chr1	238027767
chr1	238106812
chr1	238279364
chr1	238415845
chr1	238543685
chr1	239225312
chr1	239973560
chr1	240052076
chr1	241051526
chr1	241176191
chr1	241209172
chr1	242183320
chr1	242249638
chr1	242328269
chr1	242342448
chr1	242749572
chr1	242992469
chr1	243910281
chr1	244110567
chr1	244175314
chr1	244184953
chr1	244211946
chr1	244462946
chr1	244505190
chr1	244525203
chr1	244615314
chr1	244899376
chr1	245026353
chr1	245038467
chr1	245398201
chr1	245647589
chr1	245964771
chr1	246097162
chr1	246729640
chr1	247267759
chr1	247460841
chr1	247540085
chr1	247553681
chr1	247811472
chr1	249120884
chr1	193924
chr10	343216
chr10	557191
chr10	654488
chr10	670640
chr10	735681
chr10	1095159
chr10	1351989
chr10	1352583
chr10	1378430
chr10	1463261
chr10	1817100
chr10	2244109
chr10	2323196
chr10	2519572
chr10	2617874
chr10	2871367
chr10	2909065
chr10	3006564
chr10	3214979
chr10	3742416
chr10	3829061
chr10	3872085
chr10	3930447
chr10	5336301
chr10	5508785
chr10	5511239
chr10	5794066
chr10	6038729
chr10	6407875
chr10	6666751
chr10	6845544
chr10	7465633
chr10	7475573
chr10	7603277
chr10	7622581
chr10	7677584
chr10	7710084
chr10	8128471
chr10	8331660
chr10	8338171
chr10	8670514
chr10	8963662
chr10	9385070
chr10	9552780
chr10	9587250
chr10	10207595
chr10	10403689
chr10	10517966
chr10	10570388
chr10	10728328
chr10	10973528
chr10	11187089
chr10	11312714
chr10	11653504
chr10	11978629
chr10	12306357
chr10	12524692
chr10	12753395
chr10	13141276
chr10	13392096
chr10	13560289
chr10	13669925
chr10	13732710
chr10	13865226
chr10	13924512
chr10	14227477
chr10	14467355
chr10	14471207
chr10	14597915
chr10	15139235
chr10	15515317
chr10	15921898
chr10	16285150
chr10	16391056
chr10	16429064
chr10	16569561
chr10	16943320
chr10	16971273
chr10	16993285
chr10	17224019
chr10	17261317
chr10	18522724
chr10	18787241
chr10	18957200
chr10	20117945
chr10	20253811
chr10	20405041
chr10	20504911
chr10	20988010
chr10	21450878
chr10	21571163
chr10	21582333
chr10	21586758
chr10	21587144
chr10	21653531
chr10	21706331
chr10	21762366
chr10	21801821
chr10	21927006
chr10	22009233
chr10	22021340
chr10	22096311
chr10	22211045
chr10	22267371
chr10	22569237
chr10	22979873
chr10	23342138
chr10	23345018
chr10	23570201
chr10	24115576
chr10	24301370
chr10	24385471
chr10	24540633
chr10	24646458
chr10	24658699
chr10	24783922
chr10	24792724
chr10	25240465
chr10	25357630
chr10	25757348
chr10	25782191
chr10	26015030
chr10	26055738
chr10	26191645
chr10	26503258
chr10	27171147
chr10	27389494
chr10	28146669
chr10	28200800
chr10	28409167
chr10	28500859
chr10	28965620
chr10	29164769
chr10	29228901
chr10	29315267
chr10	29448796
chr10	29493334
chr10	29593661
chr10	29924855
chr10	29956318
chr10	29977354
chr10	30073551
chr10	30513876
chr10	30843014
chr10	31074219
chr10	31372926
chr10	31422817
chr10	31757344
chr10	32017919
chr10	32044114
chr10	32428421
chr10	32521627
chr10	32556130
chr10	33385222
chr10	33670971
chr10	33773860
chr10	33808667
chr10	33987257
chr10	34062039
chr10	34816196
chr10	34926599
chr10	34941840
chr10	35029174
chr10	35091859
chr10	35200281
chr10	35379596
chr10	35507594
chr10	35883531
chr10	35926472
chr10	35932482
chr10	35980952
chr10	36164365
chr10	36238901
chr10	36459516
chr10	36477066
chr10	36711860
chr10	36738524
chr10	38265559
chr10	42364944
chr10	42379924
chr10	42396908
chr10	42737298
chr10	43227928
chr10	43324195
chr10	43897260
chr10	43951322
chr10	44280878
chr10	44399953
chr10	44806670
chr10	44866580
chr10	44882232
chr10	44896172
chr10	45406589
chr10	45420796
chr10	45428378
chr10	45485807
chr10	45496454
chr10	45540024
chr10	45607195
chr10	45802930
chr10	46090337
chr10	46168102
chr10	46983908
chr10	47008160
chr10	49742346
chr10	49803131
chr10	49813375
chr10	50290038
chr10	50351516
chr10	50366656
chr10	50869619
chr10	50898449
chr10	52070771
chr10	52167342
chr10	52341336
chr10	52373361
chr10	53149323
chr10	53165902
chr10	53326431
chr10	53469344
chr10	53526711
chr10	53593021
chr10	53598553
chr10	53670138
chr10	53674911
chr10	53800450
chr10	53831420
chr10	53947511
chr10	53973585
chr10	54212491
chr10	54577877
chr10	54644241
chr10	54663475
chr10	54668396
chr10	54683517
chr10	54719805
chr10	54726089
chr10	54782501
chr10	54985461
chr10	55239367
chr10	55357732
chr10	55358798
chr10	56098434
chr10	57018947
chr10	57582116
chr10	58778436
chr10	58982570
chr10	59388576
chr10	59547098
chr10	59619025
chr10	59810500
chr10	60145169
chr10	60655354
chr10	60712640
chr10	60723750
chr10	61386134
chr10	61607284
chr10	61763604
chr10	61808104
chr10	61899668
chr10	62522562
chr10	63746316
chr10	64918137
chr10	64959682
chr10	65274824
chr10	65430118
chr10	65473217
chr10	65670801
chr10	65737272
chr10	65846062
chr10	65940763
chr10	67085918
chr10	68582790
chr10	68652805
chr10	68685770
chr10	69555046
chr10	69609306
chr10	69621677
chr10	69735839
chr10	69835121
chr10	69848037
chr10	69857073
chr10	70231621
chr10	70255966
chr10	70320088
chr10	70360210
chr10	70631883
chr10	70660727
chr10	70883906
chr10	71089644
chr10	71152462
chr10	71168694
chr10	71328827
chr10	71396836
chr10	71561622
chr10	71627640
chr10	71677734
chr10	71993479
chr10	72190443
chr10	72202274
chr10	72215298
chr10	72238600
chr10	72300466
chr10	72384217
chr10	72766462
chr10	72972226
chr10	73078925
chr10	73104553
chr10	73144159
chr10	73246486
chr10	73391673
chr10	73417629
chr10	73521438
chr10	73808510
chr10	74008810
chr10	74020882
chr10	74032778
chr10	74074962
chr10	74114814
chr10	74124275
chr10	74181835
chr10	74516849
chr10	74870225
chr10	75012241
chr10	75385518
chr10	75541679
chr10	75666645
chr10	75692342
chr10	75700593
chr10	75726132
chr10	75726935
chr10	76335278
chr10	76865688
chr10	77036219
chr10	77177604
chr10	77221776
chr10	77548319
chr10	77617212
chr10	77842970
chr10	77863132
chr10	77909636
chr10	78539393
chr10	78662892
chr10	78869244
chr10	78874463
chr10	79084925
chr10	79325003
chr10	79403914
chr10	79409729
chr10	79470041
chr10	79799755
chr10	79931558
chr10	80117054
chr10	80137320
chr10	80311267
chr10	80635428
chr10	80673711
chr10	80724973
chr10	80827176
chr10	80889352
chr10	80917493
chr10	80999909
chr10	81052932
chr10	81107155
chr10	81204390
chr10	81839027
chr10	82654239
chr10	83011341
chr10	83607631
chr10	84519066
chr10	84838101
chr10	85520094
chr10	85577692
chr10	85924416
chr10	86016979
chr10	86088385
chr10	86189978
chr10	86224858
chr10	86327513
chr10	86347742
chr10	86911269
chr10	87180715
chr10	87252943
chr10	87427821
chr10	87651488
chr10	88053434
chr10	88126668
chr10	88601471
chr10	88617039
chr10	88628293
chr10	88659166
chr10	88699367
chr10	88714208
chr10	88726506
chr10	88887331
chr10	89385648
chr10	89412165
chr10	89472832
chr10	89577917
chr10	89733497
chr10	90107518
chr10	90463218
chr10	90488377
chr10	90846714
chr10	90995169
chr10	91011569
chr10	91020377
chr10	91106574
chr10	91146125
chr10	91178317
chr10	91294141
chr10	91597535
chr10	92079519
chr10	92123995
chr10	92685638
chr10	93625631
chr10	93639774
chr10	93647177
chr10	93847694
chr10	93851728
chr10	94065534
chr10	94333865
chr10	95012907
chr10	95032915
chr10	95040791
chr10	95180221
chr10	95196016
chr10	95462425
chr10	95509043
chr10	95550426
chr10	95657360
chr10	96162339
chr10	96990189
chr10	97024534
chr10	97064496
chr10	97106950
chr10	97134557
chr10	97227219
chr10	97982414
chr10	98069860
chr10	98105199
chr10	98130580
chr10	98210753
chr10	98269107
chr10	98840150
chr10	98945926
chr10	99097031
chr10	99223610
chr10	99268386
chr10	99280924
chr10	99372353
chr10	99447203
chr10	99486615
chr10	99491706
chr10	99551982
chr10	99565450
chr10	99629308
chr10	99649501
chr10	100216660
chr10	100265085
chr10	100380354
chr10	100407142
chr10	101360030
chr10	101606039
chr10	101610024
chr10	101673889
chr10	101677948
chr10	101769769
chr10	101945895
chr10	102027490
chr10	102193749
chr10	102245910
chr10	102289647
chr10	102295621
chr10	102329728
chr10	102397898
chr10	102778880
chr10	102790464
chr10	102855488
chr10	103045674
chr10	103133056
chr10	103227248
chr10	103340883
chr10	103362702
chr10	103374603
chr10	103403934
chr10	103603539
chr10	103769790
chr10	103816074
chr10	103825205
chr10	103874821
chr10	103911907
chr10	103929374
chr10	104102432
chr10	104192402
chr10	104221116
chr10	104238896
chr10	104325729
chr10	104375249
chr10	104387695
chr10	104563268
chr10	104594920
chr10	104696350
chr10	104953016
chr10	104964879
chr10	104991150
chr10	105041766
chr10	105302925
chr10	105396477
chr10	105668176
chr10	105836785
chr10	106083079
chr10	106189785
chr10	106382569
chr10	106494945
chr10	106784117
chr10	106862907
chr10	107415585
chr10	107435332
chr10	107604275
chr10	107809642
chr10	108468474
chr10	109673555
chr10	110001184
chr10	111210604
chr10	111694834
chr10	111763041
chr10	111923260
chr10	111929043
chr10	112071356
chr10	112096357
chr10	112313854
chr10	112327191
chr10	112427981
chr10	112896971
chr10	113640617
chr10	113900143
chr10	114438568
chr10	114572002
chr10	114592498
chr10	114646411
chr10	114654182
chr10	114658774
chr10	114716791
chr10	114748921
chr10	114813934
chr10	114840887
chr10	114868456
chr10	114895116
chr10	114938709
chr10	115086595
chr10	115318236
chr10	115323421
chr10	116064590
chr10	116298070
chr10	116463588
chr10	116581541
chr10	116640805
chr10	117755704
chr10	117954799
chr10	118442083
chr10	118576821
chr10	118595851
chr10	118633954
chr10	118639743
chr10	118854745
chr10	118899217
chr10	118919168
chr10	119184995
chr10	119221801
chr10	119301024
chr10	119480799
chr10	119564064
chr10	119964030
chr10	120909574
chr10	121447018
chr10	121466566
chr10	121494721
chr10	121510319
chr10	121545832
chr10	121589112
chr10	121837293
chr10	122037730
chr10	122702574
chr10	123023603
chr10	123049017
chr10	123099898
chr10	123219581
chr10	123302342
chr10	123339883
chr10	123356379
chr10	123468632
chr10	123492616
chr10	123660190
chr10	123687573
chr10	123734863
chr10	123779126
chr10	123879811
chr10	123923011
chr10	123938527
chr10	124027748
chr10	124058528
chr10	124102073
chr10	124206772
chr10	124237816
chr10	124605703
chr10	124635881
chr10	124803070
chr10	125219373
chr10	125230219
chr10	125290241
chr10	125367147
chr10	125514772
chr10	125541728
chr10	125557522
chr10	125780709
chr10	125826468
chr10	125929675
chr10	126077964
chr10	126107449
chr10	126139958
chr10	126142981
chr10	126158729
chr10	126185812
chr10	126480260
chr10	126736927
chr10	126840604
chr10	127569962
chr10	127584632
chr10	127866474
chr10	128466480
chr10	129062564
chr10	129078966
chr10	129766542
chr10	129806593
chr10	129924667
chr10	130339729
chr10	130804264
chr10	131293269
chr10	131330103
chr10	131435423
chr10	131955796
chr10	132800834
chr10	132847521
chr10	132864449
chr10	132998002
chr10	133509428
chr10	133657412
chr10	133795563
chr10	134221611
chr10	134965416
chr10	135045945
chr10	135143453
chr10	135205698
chr10	305687
chr11	456838
chr11	518881
chr11	568619
chr11	744168
chr11	777473
chr11	783739
chr11	910886
chr11	934729
chr11	945041
chr11	1272008
chr11	1410822
chr11	1715421
chr11	1903867
chr11	2022970
chr11	2216347
chr11	2360690
chr11	2714670
chr11	2742644
chr11	2913541
chr11	3210492
chr11	3238649
chr11	3731399
chr11	3848099
chr11	3876291
chr11	4884293
chr11	6325048
chr11	6374898
chr11	6518567
chr11	6624931
chr11	6704648
chr11	7469544
chr11	7593039
chr11	7616727
chr11	8038154
chr11	8190215
chr11	8214395
chr11	8693059
chr11	8719948
chr11	9058974
chr11	9143113
chr11	9253529
chr11	9336147
chr11	9386005
chr11	9528780
chr11	9635805
chr11	9697457
chr11	9779773
chr11	9799318
chr11	9824328
chr11	9860914
chr11	9880696
chr11	9927763
chr11	9944544
chr11	10329758
chr11	10373870
chr11	10388348
chr11	10427955
chr11	10529539
chr11	10757544
chr11	10814245
chr11	11087100
chr11	11102965
chr11	11259189
chr11	11870958
chr11	12075007
chr11	12114518
chr11	12146574
chr11	12263663
chr11	12303571
chr11	12399569
chr11	12648544
chr11	12662512
chr11	12695996
chr11	12702436
chr11	12706029
chr11	12709579
chr11	12746404
chr11	12849867
chr11	12884862
chr11	13123862
chr11	13456159
chr11	14043469
chr11	14362425
chr11	14444108
chr11	15389516
chr11	15493686
chr11	15574258
chr11	15580308
chr11	15671746
chr11	15733095
chr11	16014115
chr11	16424702
[truncated: 11,524 more rows]
