# Supplementary material for: RFECS: A Random-Forest Based Algorithm for Enhancer Identification from Chromatin State
Source: PLoS Comput Biol. 2013 Mar 14;9(3):e1002968. doi: 10.1371/journal.pcbi.1002968 (PMC3597546; doi:10.1371/journal.pcbi.1002968)
Supplement: Table S3 — Transcription factor binding sites in H1. (XLS) [file pcbi.1002968.s010.xls]

## Sheet: Sheet1
Table S3. Transcription factor binding sites in H1
NANOG binding sites		OCT4 binding sites		SOX2 binding sites
Chromosome	Location	Chromosome	Location	Chromosome	Location
chr1	564356	chr1	564391	chr1	564389
chr1	1051513	chr1	875587	chr1	1192624
chr1	1072146	chr1	954724	chr1	1219256
chr1	1192544	chr1	1192758	chr1	1503340
chr1	1219378	chr1	1219410	chr1	1711423
chr1	1503246	chr1	1250909	chr1	1837707
chr1	1711529	chr1	1447270	chr1	1840480
chr1	1780142	chr1	1475758	chr1	1978011
chr1	2047420	chr1	1532826	chr1	2027129
chr1	2106771	chr1	1891509	chr1	2179748
chr1	2179731	chr1	1978015	chr1	3662983
chr1	2210784	chr1	2027129	chr1	3709999
chr1	2460532	chr1	2106711	chr1	4711048
chr1	3231918	chr1	2241212	chr1	4717436
chr1	3710006	chr1	2313269	chr1	4768962
chr1	3827472	chr1	2382020	chr1	5079941
chr1	4710965	chr1	2572258	chr1	5113909
chr1	4815302	chr1	2941460	chr1	5150289
chr1	5079866	chr1	3662949	chr1	5179201
chr1	5113778	chr1	5285792	chr1	5285786
chr1	5179309	chr1	5578644	chr1	5327720
chr1	5285604	chr1	6259498	chr1	5334712
chr1	5334806	chr1	6299355	chr1	5484916
chr1	5484913	chr1	6445751	chr1	5747070
chr1	5956930	chr1	6555442	chr1	5890875
chr1	5993381	chr1	6604523	chr1	5957055
chr1	6052541	chr1	6614422	chr1	6113064
chr1	6112667	chr1	6761642	chr1	6259287
chr1	6113101	chr1	6845592	chr1	6299464
chr1	6300366	chr1	7003221	chr1	6300330
chr1	6305881	chr1	7023320	chr1	6403502
chr1	6754227	chr1	7268061	chr1	6469268
chr1	6780161	chr1	7945735	chr1	6500444
chr1	6972136	chr1	8035417	chr1	6546595
chr1	7016561	chr1	8409121	chr1	6555624
chr1	7049698	chr1	8791346	chr1	6557335
chr1	7267780	chr1	8975651	chr1	6583686
chr1	7340640	chr1	9218708	chr1	6706611
chr1	7358068	chr1	9258829	chr1	6751931
chr1	7359271	chr1	9327175	chr1	6780146
chr1	7596261	chr1	9471007	chr1	6787608
chr1	7812563	chr1	9488842	chr1	6790640
chr1	7868405	chr1	9515965	chr1	6972201
chr1	8042347	chr1	9551053	chr1	7049675
chr1	8051946	chr1	9600131	chr1	7177670
chr1	8227031	chr1	9785105	chr1	7278203
chr1	8326809	chr1	9844697	chr1	7340712
chr1	8433231	chr1	9927562	chr1	7358055
chr1	8468101	chr1	9934997	chr1	7812415
chr1	8471890	chr1	10010474	chr1	7868417
chr1	8499075	chr1	10378067	chr1	7897138
chr1	8503558	chr1	11332758	chr1	8042406
chr1	8519913	chr1	11845176	chr1	8052031
chr1	8621083	chr1	12127742	chr1	8075000
chr1	8651918	chr1	12602818	chr1	8227033
chr1	8772391	chr1	14050344	chr1	8326747
chr1	8791275	chr1	14292396	chr1	8430553
chr1	8849669	chr1	14898315	chr1	8503449
chr1	8851201	chr1	15297780	chr1	8519949
chr1	8874881	chr1	15455157	chr1	8621001
chr1	8923639	chr1	15650149	chr1	8772300
chr1	8933409	chr1	15710881	chr1	8791155
chr1	8943678	chr1	15835271	chr1	8843508
chr1	8975555	chr1	16142008	chr1	8849822
chr1	9111536	chr1	16455813	chr1	8943622
chr1	9129077	chr1	16508461	chr1	8975607
chr1	9225578	chr1	16766912	chr1	9111341
chr1	9312793	chr1	16840431	chr1	9218741
chr1	9349087	chr1	16947620	chr1	9225502
chr1	9488789	chr1	17036300	chr1	9313052
chr1	9619891	chr1	17563641	chr1	9348969
chr1	9633861	chr1	17796588	chr1	9471184
chr1	9848923	chr1	17811838	chr1	9488868
chr1	9982360	chr1	17820810	chr1	9555704
chr1	9986833	chr1	17828918	chr1	9821606
chr1	9989469	chr1	18621355	chr1	9844731
chr1	10010495	chr1	18854238	chr1	9927648
chr1	10177968	chr1	18902014	chr1	9971095
chr1	10377952	chr1	19147143	chr1	9989469
chr1	10407571	chr1	20113546	chr1	10125664
chr1	10532542	chr1	20550231	chr1	10213076
chr1	10706525	chr1	20968599	chr1	10378066
chr1	10739700	chr1	21022689	chr1	10437551
chr1	10794583	chr1	21655727	chr1	10458308
chr1	10895793	chr1	22290469	chr1	10550588
chr1	11018659	chr1	22743207	chr1	10794363
chr1	11097614	chr1	22778224	chr1	10875167
chr1	11346699	chr1	23256745	chr1	11040270
chr1	11416107	chr1	23290734	chr1	11097725
chr1	11442178	chr1	23389478	chr1	11346524
chr1	11477349	chr1	23683909	chr1	11566080
chr1	11559654	chr1	23882484	chr1	11610784
chr1	11610737	chr1	23924956	chr1	11632333
chr1	11632338	chr1	24077853	chr1	11702462
chr1	11742169	chr1	24098552	chr1	11742369
chr1	11749661	chr1	24240102	chr1	11749602
chr1	11785846	chr1	24476932	chr1	11771193
chr1	11796014	chr1	24513639	chr1	11785785
chr1	11822627	chr1	24528241	chr1	11967788
chr1	11919430	chr1	24613157	chr1	11969516
chr1	11954051	chr1	25031108	chr1	12061680
chr1	11967790	chr1	25034245	chr1	12109827
chr1	11981135	chr1	25235998	chr1	12127742
chr1	12040133	chr1	25364103	chr1	12138802
chr1	12109750	chr1	26106758	chr1	12178711
chr1	12127734	chr1	26282947	chr1	12309115
chr1	12138755	chr1	26297611	chr1	12399745
chr1	12302200	chr1	26324645	chr1	12719007
chr1	12309083	chr1	26633000	chr1	12777226
chr1	12399844	chr1	26648156	chr1	13876043
chr1	12418914	chr1	26756258	chr1	13912030
chr1	12493675	chr1	27004019	chr1	14041494
chr1	12571178	chr1	27433779	chr1	14050387
chr1	12675665	chr1	27561042	chr1	14085566
chr1	12689232	chr1	27627390	chr1	14091496
chr1	12747781	chr1	27929495	chr1	14332249
chr1	12777163	chr1	27949367	chr1	14646965
chr1	12805966	chr1	28975025	chr1	14731328
chr1	13876056	chr1	28995088	chr1	14919739
chr1	13912026	chr1	29491209	chr1	15068686
chr1	13930796	chr1	29524040	chr1	15093595
chr1	14050402	chr1	29529380	chr1	15301904
chr1	14337004	chr1	31180972	chr1	15434350
chr1	14401410	chr1	31328639	chr1	15523149
chr1	14462825	chr1	31395292	chr1	15691354
chr1	14509707	chr1	32211216	chr1	15710903
chr1	14731356	chr1	32281436	chr1	15835198
chr1	14919856	chr1	32826882	chr1	15921676
chr1	15005972	chr1	33202410	chr1	15929933
chr1	15052168	chr1	33207181	chr1	16129897
chr1	15059665	chr1	33282707	chr1	16141926
chr1	15068681	chr1	33338245	chr1	16156565
chr1	15093551	chr1	33438500	chr1	16160340
chr1	15379795	chr1	33446301	chr1	16442434
chr1	15426904	chr1	33502335	chr1	16689888
chr1	15434285	chr1	33546515	chr1	16840446
chr1	15455100	chr1	33761189	chr1	17036229
chr1	15461697	chr1	33773197	chr1	17231600
chr1	15523281	chr1	33844886	chr1	17341818
chr1	15533069	chr1	34257953	chr1	17386240
chr1	15710851	chr1	35318218	chr1	17456767
chr1	15835158	chr1	36020470	chr1	17565876
chr1	15921708	chr1	36034623	chr1	17636490
chr1	16141932	chr1	36235202	chr1	17732523
chr1	16156795	chr1	36351505	chr1	17755269
chr1	16160293	chr1	36565350	chr1	17796647
chr1	16302346	chr1	36653822	chr1	17803916
chr1	16339299	chr1	37500096	chr1	17820732
chr1	16439569	chr1	37781246	chr1	17847951
chr1	16442407	chr1	37917730	chr1	18188183
chr1	16689893	chr1	38455610	chr1	18247591
chr1	16693429	chr1	38518908	chr1	18284033
chr1	17341834	chr1	38541751	chr1	18303439
chr1	17456674	chr1	38888685	chr1	18417081
chr1	17571894	chr1	38908537	chr1	18427056
chr1	17636482	chr1	39193291	chr1	18526516
chr1	17703863	chr1	39325532	chr1	18582829
chr1	17741653	chr1	39467156	chr1	18744044
chr1	17755341	chr1	39572452	chr1	18779119
chr1	17760404	chr1	39843919	chr1	18807274
chr1	17796646	chr1	40177771	chr1	18884231
chr1	17803955	chr1	40439280	chr1	18911289
chr1	17847930	chr1	41496927	chr1	18918828
chr1	18065418	chr1	41707703	chr1	18929823
chr1	18188250	chr1	42039814	chr1	18966788
chr1	18303458	chr1	42612642	chr1	19007853
chr1	18502987	chr1	42921738	chr1	19111383
chr1	18559815	chr1	43282659	chr1	19767841
chr1	18621206	chr1	43474129	chr1	19808261
chr1	18744109	chr1	43539288	chr1	19908863
chr1	18745536	chr1	43573059	chr1	19980277
chr1	18779117	chr1	43703867	chr1	20015658
chr1	18807330	chr1	43994885	chr1	20473709
chr1	18884184	chr1	44126062	chr1	20521043
chr1	18894280	chr1	44471382	chr1	20732663
chr1	18918822	chr1	44482912	chr1	20775292
chr1	18929871	chr1	44883035	chr1	20820329
chr1	18973012	chr1	45008721	chr1	20834590
chr1	18976176	chr1	45118531	chr1	20968530
chr1	19007974	chr1	45155113	chr1	21088539
chr1	19111286	chr1	45259448	chr1	21262281
chr1	19121088	chr1	45452196	chr1	21372555
chr1	19239570	chr1	45480091	chr1	21427068
chr1	19261846	chr1	45917895	chr1	21521552
chr1	19466047	chr1	45950955	chr1	21596678
chr1	19679918	chr1	45965624	chr1	21604639
chr1	19717945	chr1	46030339	chr1	21655701
chr1	19727567	chr1	46502811	chr1	21695070
chr1	19767996	chr1	46509323	chr1	21845378
chr1	19783386	chr1	46859939	chr1	21879831
chr1	19808282	chr1	46907976	chr1	21900490
chr1	19980288	chr1	47658740	chr1	22192584
chr1	19986181	chr1	48430796	chr1	22270869
chr1	20015509	chr1	49242180	chr1	22349473
chr1	20277484	chr1	52831649	chr1	22351713
chr1	20520980	chr1	52927555	chr1	22363910
chr1	20539524	chr1	53018341	chr1	22432073
chr1	20617169	chr1	53441739	chr1	22560884
chr1	20732526	chr1	53704131	chr1	22617504
chr1	20820910	chr1	53900782	chr1	22647170
chr1	20829350	chr1	54147888	chr1	22721830
chr1	20916529	chr1	54518937	chr1	22743067
chr1	20952052	chr1	54953975	chr1	22760420
chr1	20987785	chr1	54956217	chr1	22854333
chr1	21224202	chr1	55181410	chr1	23303079
chr1	21448586	chr1	55416442	chr1	23461413
chr1	21604710	chr1	55743202	chr1	23479763
chr1	21655483	chr1	56836153	chr1	23486617
chr1	21818394	chr1	56918960	chr1	23544544
chr1	21836670	chr1	56964661	chr1	23589717
chr1	21845358	chr1	57667979	chr1	23665808
chr1	21879845	chr1	58066280	chr1	23683901
chr1	21985697	chr1	58472374	chr1	23697350
chr1	22192487	chr1	58497175	chr1	23721500
chr1	22270928	chr1	60225238	chr1	23871283
chr1	22349408	chr1	60574137	chr1	23882257
chr1	22535108	chr1	61471219	chr1	23924636
chr1	22561049	chr1	61508604	chr1	23991734
chr1	22591450	chr1	62417460	chr1	24137371
chr1	22647115	chr1	62487929	chr1	24230052
chr1	22720865	chr1	62661746	chr1	24240055
chr1	22755147	chr1	62744842	chr1	24290314
chr1	22769826	chr1	62777089	chr1	24306927
chr1	22778170	chr1	63428762	chr1	24329541
chr1	22816879	chr1	63655460	chr1	24354611
chr1	22826548	chr1	63664799	chr1	24476823
chr1	22854393	chr1	63764990	chr1	24480724
chr1	22935770	chr1	63770716	chr1	24513639
chr1	23096755	chr1	64157731	chr1	24528272
chr1	23132192	chr1	64196923	chr1	24613182
chr1	23345736	chr1	64963093	chr1	24634707
chr1	23378092	chr1	64982587	chr1	24701587
chr1	23389481	chr1	65615109	chr1	24769691
chr1	23479902	chr1	65675027	chr1	24790175
chr1	23486544	chr1	66424518	chr1	24861371
chr1	23511239	chr1	66708416	chr1	24868551
chr1	23574929	chr1	67965990	chr1	24950701
chr1	23589694	chr1	67981378	chr1	24961829
chr1	23683897	chr1	68163019	chr1	25051736
chr1	23697365	chr1	68358550	chr1	25066294
chr1	23721532	chr1	68585942	chr1	25475124
chr1	23882125	chr1	68808396	chr1	25531418
chr1	23888669	chr1	69444654	chr1	25559390
chr1	23924631	chr1	70400108	chr1	25574486
chr1	23984200	chr1	71053450	chr1	25846903
chr1	24230443	chr1	71210979	chr1	26033577
chr1	24240056	chr1	71927878	chr1	26051426
chr1	24329465	chr1	72203519	chr1	26106702
chr1	24397372	chr1	74408998	chr1	26137404
chr1	24480656	chr1	74987916	chr1	26163794
chr1	24613234	chr1	75548927	chr1	26201734
chr1	24634554	chr1	75808536	chr1	26282877
chr1	24661428	chr1	76696479	chr1	26324363
chr1	24701761	chr1	77320017	chr1	26471715
chr1	24741773	chr1	77436905	chr1	26560243
chr1	24790937	chr1	78136620	chr1	26642746
chr1	24861384	chr1	78437761	chr1	26717905
chr1	24959003	chr1	79433891	chr1	26756233
chr1	24961837	chr1	79806921	chr1	26796756
chr1	25031789	chr1	80263329	chr1	26924149
chr1	25051664	chr1	80383672	chr1	26945591
chr1	25066363	chr1	80566529	chr1	27051416
chr1	25070392	chr1	80971942	chr1	27286672
chr1	25265036	chr1	81778273	chr1	27293508
chr1	25276860	chr1	81843200	chr1	27333392
chr1	25427920	chr1	81919829	chr1	27396863
chr1	25475141	chr1	82246329	chr1	27423963
chr1	25531426	chr1	82951504	chr1	27524529
chr1	25580443	chr1	85809601	chr1	27560828
chr1	26033563	chr1	87207779	chr1	27714780
chr1	26042481	chr1	88646231	chr1	27743092
chr1	26051485	chr1	89551447	chr1	27756344
chr1	26106708	chr1	90098521	chr1	27949356
chr1	26137369	chr1	90259979	chr1	27956018
chr1	26297619	chr1	91027408	chr1	27982652
chr1	26324447	chr1	91274773	chr1	28133853
chr1	26665818	chr1	91392478	chr1	28134598
chr1	26690269	chr1	91585856	chr1	28184570
chr1	26739437	chr1	91852762	chr1	28263795
chr1	26756251	chr1	93544585	chr1	28347488
chr1	26944980	chr1	93666872	chr1	28417814
chr1	27051270	chr1	93811182	chr1	28522858
chr1	27091031	chr1	93876394	chr1	28592529
chr1	27325970	chr1	94018708	chr1	28617256
chr1	27333302	chr1	94354564	chr1	28741787
chr1	27384520	chr1	95126671	chr1	28832250
chr1	27562015	chr1	95132214	chr1	28837165
chr1	27627875	chr1	95352859	chr1	28879265
chr1	27743069	chr1	95508894	chr1	28903524
chr1	27756431	chr1	95850045	chr1	28929443
chr1	27853803	chr1	96468711	chr1	28974901
chr1	27863279	chr1	96941059	chr1	28995283
chr1	27919627	chr1	97516140	chr1	29015205
chr1	27949348	chr1	97580417	chr1	29083411
chr1	27982571	chr1	98968369	chr1	29111610
chr1	28052037	chr1	100349468	chr1	29203428
chr1	28133625	chr1	100929435	chr1	29254383
chr1	28263668	chr1	101985806	chr1	29439037
chr1	28522691	chr1	102179401	chr1	29491109
chr1	28562408	chr1	104163708	chr1	29508606
chr1	28617319	chr1	105300547	chr1	29513117
chr1	28623268	chr1	107748213	chr1	29545274
chr1	28741788	chr1	108347488	chr1	29575814
chr1	28749030	chr1	108507795	chr1	29604882
chr1	28850066	chr1	108668224	chr1	29660094
chr1	28969504	chr1	109513651	chr1	29667273
chr1	28975081	chr1	109772419	chr1	29706132
chr1	29054731	chr1	109806076	chr1	29751190
chr1	29083352	chr1	110527084	chr1	30080048
chr1	29254279	chr1	111037503	chr1	30137472
chr1	29329996	chr1	112289929	chr1	30294411
chr1	29423002	chr1	112912199	chr1	30322027
chr1	29490855	chr1	113051189	chr1	30446929
chr1	29513107	chr1	113337352	chr1	30705245
chr1	29545285	chr1	113351905	chr1	30715899
chr1	29575730	chr1	113360631	chr1	30826566
chr1	29706136	chr1	113454218	chr1	31180925
chr1	30137467	chr1	114519634	chr1	31205709
chr1	30321985	chr1	114577531	chr1	31277661
chr1	30446994	chr1	114580532	chr1	31317517
chr1	30479144	chr1	115300534	chr1	31328587
chr1	30715489	chr1	115322949	chr1	31467482
chr1	31205721	chr1	117811497	chr1	31507459
chr1	31232980	chr1	118694110	chr1	31527409
chr1	31255256	chr1	119297642	chr1	31839797
chr1	31277659	chr1	121484113	chr1	31867471
chr1	31310657	chr1	144533854	chr1	31932916
chr1	31317388	chr1	144931873	chr1	31957886
chr1	31618453	chr1	145382592	chr1	32029644
chr1	31769537	chr1	145472351	chr1	32248434
chr1	31839579	chr1	145542835	chr1	32281537
chr1	31932953	chr1	146714539	chr1	32473960
chr1	31958032	chr1	147039732	chr1	32526429
chr1	32029706	chr1	147196126	chr1	32573372
chr1	32254878	chr1	147806408	chr1	32860295
chr1	32281552	chr1	148605068	chr1	32903758
chr1	32409351	chr1	149224287	chr1	32920283
chr1	32429788	chr1	149514118	chr1	33005777
chr1	32473984	chr1	150022463	chr1	33098459
chr1	32526463	chr1	150528220	chr1	33108044
chr1	32573422	chr1	150895020	chr1	33202321
chr1	32757368	chr1	151043480	chr1	33446336
chr1	32860053	chr1	151689275	chr1	33592567
chr1	32903569	chr1	153505721	chr1	33889734
chr1	32930210	chr1	153650216	chr1	33894968
chr1	33098448	chr1	154540149	chr1	33937378
chr1	33102348	chr1	154581169	chr1	34078577
chr1	33108119	chr1	154600335	chr1	34101135
chr1	33202198	chr1	154714444	chr1	34271541
chr1	33313980	chr1	154955273	chr1	34333508
chr1	33342354	chr1	155165890	chr1	34485501
chr1	33352212	chr1	155188764	chr1	34505811
chr1	33446242	chr1	155220545	chr1	34645576
chr1	33467007	chr1	155658381	chr1	34758193
chr1	33622264	chr1	155954231	chr1	34861725
chr1	33713103	chr1	155959235	chr1	35096820
chr1	33889902	chr1	155990543	chr1	35111998
chr1	33895045	chr1	156060404	chr1	35147169
chr1	33937524	chr1	156186163	chr1	35177240
chr1	34101203	chr1	156195296	chr1	35325438
chr1	34106827	chr1	156352869	chr1	35497362
chr1	34333514	chr1	156474938	chr1	35554639
chr1	34485486	chr1	156495867	chr1	35667670
chr1	34503461	chr1	156643467	chr1	35686752
chr1	34669678	chr1	156695661	chr1	35764187
chr1	34861541	chr1	156716834	chr1	35936652
chr1	34966012	chr1	156836091	chr1	35979586
chr1	35096744	chr1	156929475	chr1	35989804
chr1	35122404	chr1	157918356	chr1	36020382
chr1	35177256	chr1	157933530	chr1	36034448
chr1	35387121	chr1	158015525	chr1	36156593
chr1	35578178	chr1	158094812	chr1	36273467
chr1	35604521	chr1	159861429	chr1	36323413
chr1	35639441	chr1	160139261	chr1	36351548
chr1	35658553	chr1	160951417	chr1	36554283
chr1	35667771	chr1	160983465	chr1	36615051
chr1	35675548	chr1	161171887	chr1	36863472
chr1	35827230	chr1	161261469	chr1	37138856
chr1	35859083	chr1	161509864	chr1	37176588
chr1	35871809	chr1	162025856	chr1	37236656
chr1	35936687	chr1	163041399	chr1	37269752
chr1	35989810	chr1	163291504	chr1	37407188
chr1	36020491	chr1	163379724	chr1	37708908
chr1	36107066	chr1	163437148	chr1	37733004
chr1	36156687	chr1	163531431	chr1	37740443
chr1	36235518	chr1	164644017	chr1	38148059
chr1	36315668	chr1	165022541	chr1	38325852
chr1	36396780	chr1	166312146	chr1	38422958
chr1	36614837	chr1	167399798	chr1	38455579
chr1	36771763	chr1	167657259	chr1	38484589
chr1	36929707	chr1	167772583	chr1	38605776
chr1	37138909	chr1	167977921	chr1	38687832
chr1	37176488	chr1	168115167	chr1	38710180
chr1	37236752	chr1	168357044	chr1	38736146
chr1	37269750	chr1	170018934	chr1	38751544
chr1	37285986	chr1	170472876	chr1	38836503
chr1	37312813	chr1	171182715	chr1	38888500
chr1	37321707	chr1	171196010	chr1	38955356
chr1	37389953	chr1	171267843	chr1	39058934
chr1	37407169	chr1	171401119	chr1	39065944
chr1	37541825	chr1	171770521	chr1	39193018
chr1	37709034	chr1	172061943	chr1	39456178
chr1	37721140	chr1	173683954	chr1	39467201
chr1	37857282	chr1	173991303	chr1	39473034
chr1	38148111	chr1	174175544	chr1	39517824
chr1	38455668	chr1	174766585	chr1	39558080
chr1	38507390	chr1	174840914	chr1	39568293
chr1	38537455	chr1	174998900	chr1	39607629
chr1	38578890	chr1	175288848	chr1	39636265
chr1	38605786	chr1	175726521	chr1	39649443
chr1	38649066	chr1	177763684	chr1	39835249
chr1	38687810	chr1	178349057	chr1	39843877
chr1	38736142	chr1	178896901	chr1	40167139
chr1	38751501	chr1	179088605	chr1	40177692
chr1	38829822	chr1	179198840	chr1	40185567
chr1	38836430	chr1	179498618	chr1	40358679
chr1	38888679	chr1	179757516	chr1	40364558
chr1	38942359	chr1	180484908	chr1	40609583
chr1	38955420	chr1	180502705	chr1	40618824
chr1	39058925	chr1	180628619	chr1	40758457
chr1	39065935	chr1	181111663	chr1	40804379
chr1	39193458	chr1	181159122	chr1	40819623
chr1	39253914	chr1	182927071	chr1	40875039
chr1	39269353	chr1	182992077	chr1	40904157
chr1	39325252	chr1	183250700	chr1	41078032
chr1	39357518	chr1	183372402	chr1	41174281
chr1	39419175	chr1	183914518	chr1	41177831
chr1	39450995	chr1	184079949	chr1	41290583
chr1	39456216	chr1	184466990	chr1	41806762
chr1	39467209	chr1	184774825	chr1	41952278
chr1	39473117	chr1	185514135	chr1	42289209
chr1	39482502	chr1	185615539	chr1	42612488
chr1	39558068	chr1	185650351	chr1	42806316
chr1	39568314	chr1	186451919	chr1	42809815
chr1	39572829	chr1	186469954	chr1	42869822
chr1	39607650	chr1	187016539	chr1	43070300
chr1	39625064	chr1	190121584	chr1	43243523
chr1	39636443	chr1	191571298	chr1	43379124
chr1	39658975	chr1	191938512	chr1	43388612
chr1	39835277	chr1	192385418	chr1	43474277
chr1	39843979	chr1	192946089	chr1	43493873
chr1	40167216	chr1	193082391	chr1	43527509
chr1	40176429	chr1	193533623	chr1	43539194
chr1	40177699	chr1	193562280	chr1	43556996
chr1	40185788	chr1	193710269	chr1	43573059
chr1	40343572	chr1	193734018	chr1	43761020
chr1	40358832	chr1	195578004	chr1	43855924
chr1	40388127	chr1	196342891	chr1	43959874
chr1	40609617	chr1	196692592	chr1	43974685
chr1	40618823	chr1	197170335	chr1	43994876
chr1	40758456	chr1	197783455	chr1	44000681
chr1	40804349	chr1	197887306	chr1	44118841
chr1	40875093	chr1	198287005	chr1	44125905
chr1	40974139	chr1	198962966	chr1	44229099
chr1	41239283	chr1	199601021	chr1	44300670
chr1	41806839	chr1	200017302	chr1	44502203
chr1	41952075	chr1	200271513	chr1	44572483
chr1	42179299	chr1	200380536	chr1	44585221
chr1	42289159	chr1	200948792	chr1	44593595
chr1	42391497	chr1	201017826	chr1	44678664
chr1	42806254	chr1	201377427	chr1	44683347
chr1	42928492	chr1	201450851	chr1	44882960
chr1	43070356	chr1	201528869	chr1	44972743
chr1	43243663	chr1	202291493	chr1	45000308
chr1	43379112	chr1	202317667	chr1	45008804
chr1	43474160	chr1	202330862	chr1	45037836
chr1	43527516	chr1	202536696	chr1	45073909
chr1	43556776	chr1	202569253	chr1	45118606
chr1	43880367	chr1	203488450	chr1	45142754
chr1	43959776	chr1	203619658	chr1	45155042
chr1	43974703	chr1	203830473	chr1	45174553
chr1	43980687	chr1	203954262	chr1	45196471
chr1	44000756	chr1	204159529	chr1	45265364
chr1	44118935	chr1	204381081	chr1	45285005
chr1	44125916	chr1	204593865	chr1	45451979
chr1	44229174	chr1	204679421	chr1	45480136
chr1	44231725	chr1	204683888	chr1	45670396
chr1	44300490	chr1	204732999	chr1	45805689
chr1	44435448	chr1	204995848	chr1	45825877
chr1	44572495	chr1	205107079	chr1	45917758
chr1	44585373	chr1	205180249	chr1	46016339
chr1	44620271	chr1	205313528	chr1	46030426
chr1	44793934	chr1	205498031	chr1	46035867
chr1	44805410	chr1	205560929	chr1	46049005
chr1	44972951	chr1	205689330	chr1	46150880
chr1	44998181	chr1	205744483	chr1	46374439
chr1	45008687	chr1	206653254	chr1	46391965
chr1	45049861	chr1	206785772	chr1	46449702
chr1	45073900	chr1	207494538	chr1	46502621
chr1	45155033	chr1	207628017	chr1	46509289
chr1	45196399	chr1	208195093	chr1	46687429
chr1	45205211	chr1	208375620	chr1	46768905
chr1	45285375	chr1	208954853	chr1	46775480
chr1	45350080	chr1	209606737	chr1	46799309
chr1	45477666	chr1	209722810	chr1	46908050
chr1	45670523	chr1	209920908	chr1	47013773
chr1	45772755	chr1	210163587	chr1	47190950
chr1	45917719	chr1	210424515	chr1	47201489
chr1	45920965	chr1	210459245	chr1	47456817
chr1	45956707	chr1	210484454	chr1	47644838
chr1	45965690	chr1	210547198	chr1	47925764
chr1	46030426	chr1	210757678	chr1	48030214
chr1	46035868	chr1	211307397	chr1	48398385
chr1	46150842	chr1	211828664	chr1	48449305
chr1	46196195	chr1	213124726	chr1	48526799
chr1	46374482	chr1	213466218	chr1	48559315
chr1	46392043	chr1	213843732	chr1	48575147
chr1	46509397	chr1	214189525	chr1	48576220
chr1	46913874	chr1	214200463	chr1	48702474
chr1	46959831	chr1	214502231	chr1	48775912
chr1	46982695	chr1	214638321	chr1	48931546
chr1	46990982	chr1	214758637	chr1	49038340
chr1	47184701	chr1	215825128	chr1	49133546
chr1	47191040	chr1	215941028	chr1	49175966
chr1	47201367	chr1	216187919	chr1	49272015
chr1	47456857	chr1	216444586	chr1	49381724
chr1	47483167	chr1	216561941	chr1	50744686
chr1	47595628	chr1	216913536	chr1	50814478
chr1	47644841	chr1	217221566	chr1	50962533
chr1	47674155	chr1	217517287	chr1	51071265
chr1	47696225	chr1	218062859	chr1	51086376
chr1	47779770	chr1	220463789	chr1	51201037
chr1	47854532	chr1	220512118	chr1	51240574
chr1	47924340	chr1	221342802	chr1	51259102
chr1	47925766	chr1	221888663	chr1	51313193
chr1	47960993	chr1	222628462	chr1	51655098
chr1	48030241	chr1	223254781	chr1	51657766
chr1	48363842	chr1	223298897	chr1	51762476
chr1	48449490	chr1	224370659	chr1	51888760
chr1	48509245	chr1	224423853	chr1	51972503
chr1	48526751	chr1	224475558	chr1	52000716
chr1	48576329	chr1	225662638	chr1	52082473
chr1	48702561	chr1	225668711	chr1	52093307
chr1	48708622	chr1	226033352	chr1	52324242
chr1	48931537	chr1	226078045	chr1	52344508
chr1	49028885	chr1	226086876	chr1	52362506
chr1	49176144	chr1	226112123	chr1	52467920
chr1	49350401	chr1	226249864	chr1	52499295
chr1	50627024	chr1	226708382	chr1	52585620
chr1	50629363	chr1	227625268	chr1	52648915
chr1	50744620	chr1	227950215	chr1	52734132
chr1	51031114	chr1	228187117	chr1	52803247
chr1	51034583	chr1	228296921	chr1	52816758
chr1	51050714	chr1	228353287	chr1	52927547
chr1	51052275	chr1	228566032	chr1	53079213
chr1	51071277	chr1	228871524	chr1	53166649
chr1	51165707	chr1	228988912	chr1	53281885
chr1	51184368	chr1	229478068	chr1	53291524
chr1	51240581	chr1	230322095	chr1	53298186
chr1	51259286	chr1	230413129	chr1	53301738
chr1	51425828	chr1	230563768	chr1	53328812
chr1	51655173	chr1	231007719	chr1	53441785
chr1	51657979	chr1	231120595	chr1	53581512
chr1	51753380	chr1	231347043	chr1	53896310
chr1	51888782	chr1	232119276	chr1	53900767
chr1	52000802	chr1	232590362	chr1	54139144
chr1	52093355	chr1	232608447	chr1	54171691
chr1	52799032	chr1	232755908	chr1	54344122
chr1	52816682	chr1	234201647	chr1	54399790
chr1	52831700	chr1	234247306	chr1	54535822
chr1	52927566	chr1	234533007	chr1	54873073
chr1	53079235	chr1	234614494	chr1	55035352
chr1	53098690	chr1	235247110	chr1	55137827
chr1	53125573	chr1	235267565	chr1	55217220
chr1	53132761	chr1	235433905	chr1	55230228
chr1	53144732	chr1	235704744	chr1	55334903
chr1	53291648	chr1	236030116	chr1	55416314
chr1	53298196	chr1	236135027	chr1	55428372
chr1	53301726	chr1	236767743	chr1	55606133
chr1	53309106	chr1	237205068	chr1	55678447
chr1	53409631	chr1	237411570	chr1	55730871
chr1	53441866	chr1	238027535	chr1	55743194
chr1	53581511	chr1	238046857	chr1	55789497
chr1	53655860	chr1	238106502	chr1	55841326
chr1	53882174	chr1	239225141	chr1	55918466
chr1	53900774	chr1	239977557	chr1	55944343
chr1	53914169	chr1	240755835	chr1	56633433
chr1	54100367	chr1	240944461	chr1	56654534
chr1	54147731	chr1	241051406	chr1	56655575
chr1	54170785	chr1	241175926	chr1	56662245
chr1	54304266	chr1	241649135	chr1	56836222
chr1	54535875	chr1	243895850	chr1	56840982
chr1	54749759	chr1	243903566	chr1	56855765
chr1	54775346	chr1	244110277	chr1	56878013
chr1	54873217	chr1	244436471	chr1	56902657
chr1	55035184	chr1	244533003	chr1	56918981
chr1	55076639	chr1	245206054	chr1	56959964
chr1	55217080	chr1	246113114	chr1	57000796
chr1	55230150	chr1	246160190	chr1	57008927
chr1	55279223	chr1	246859694	chr1	57015731
chr1	55428191	chr1	247553507	chr1	57028812
chr1	55487651	chr1	247636751	chr1	57032719
chr1	55537161	chr1	248567437	chr1	57042498
chr1	55563335	chr10	343144	chr1	57174165
chr1	55606168	chr10	557034	chr1	57175067
chr1	55667443	chr10	562596	chr1	57404915
chr1	55743264	chr10	654106	chr1	57459530
chr1	55789407	chr10	707796	chr1	57514392
chr1	55844193	chr10	1418986	chr1	57559124
chr1	55934714	chr10	2123745	chr1	57577755
chr1	55996424	chr10	2756898	chr1	57661127
chr1	56184461	chr10	4607858	chr1	57667852
chr1	56206887	chr10	5378648	chr1	57670458
chr1	56370257	chr10	5991298	chr1	57671494
chr1	56647081	chr10	6443831	chr1	57690319
chr1	56654648	chr10	8331366	chr1	57887152
chr1	56662360	chr10	9344096	chr1	57945936
chr1	56692699	chr10	9384759	chr1	58066099
chr1	56836297	chr10	9587021	chr1	58298219
chr1	56840994	chr10	10728202	chr1	58360222
chr1	56878208	chr10	12524483	chr1	58432675
chr1	56902700	chr10	12610107	chr1	58449915
chr1	56919034	chr10	12753108	chr1	58468585
chr1	56960030	chr10	13391694	chr1	58472303
chr1	56976594	chr10	13437671	chr1	58496976
chr1	56986018	chr10	13669796	chr1	58623666
chr1	57000796	chr10	13731132	chr1	58702139
chr1	57009375	chr10	13933718	chr1	58845248
chr1	57015650	chr10	14074520	chr1	58850926
chr1	57028706	chr10	14227448	chr1	58864708
chr1	57032316	chr10	14520634	chr1	59154941
chr1	57042591	chr10	14561838	chr1	59322783
chr1	57050718	chr10	15001976	chr1	59328477
chr1	57131969	chr10	15413117	chr1	59378140
chr1	57297502	chr10	16153363	chr1	59479310
chr1	57404950	chr10	16284818	chr1	59538360
chr1	57459669	chr10	16685649	chr1	59543169
chr1	57514506	chr10	16943166	chr1	59582115
chr1	57577791	chr10	17700767	chr1	59594455
chr1	57631491	chr10	19977005	chr1	59849886
chr1	57667859	chr10	20504752	chr1	59912144
chr1	57670609	chr10	20661783	chr1	59966512
chr1	57671476	chr10	20903874	chr1	60135587
chr1	57728163	chr10	21762103	chr1	60164846
chr1	57823214	chr10	21811186	chr1	60225249
chr1	57916608	chr10	22096131	chr1	60757151
chr1	57983253	chr10	23165050	chr1	60891100
chr1	58062568	chr10	23570077	chr1	61314996
chr1	58066095	chr10	24113488	chr1	61371714
chr1	58071539	chr10	24636833	chr1	61440243
chr1	58106159	chr10	25357326	chr1	61471096
chr1	58143849	chr10	26014926	chr1	61524055
chr1	58191126	chr10	26045393	chr1	61577320
chr1	58257263	chr10	26795106	chr1	61623514
chr1	58298230	chr10	27545665	chr1	61713592
chr1	58360041	chr10	29228287	chr1	61749906
chr1	58393229	chr10	29508028	chr1	61766562
chr1	58436120	chr10	29956081	chr1	61785443
chr1	58449917	chr10	30127722	chr1	61928011
chr1	58452867	chr10	30291462	chr1	61942978
chr1	58468660	chr10	31423095	chr1	61972828
chr1	58472224	chr10	31757204	chr1	62005484
chr1	58485377	chr10	32017914	chr1	62212282
chr1	58496896	chr10	32555807	chr1	62218394
chr1	58512990	chr10	33517782	chr1	62319869
chr1	58588833	chr10	33808582	chr1	62417214
chr1	58623667	chr10	33987100	chr1	62488020
chr1	58677537	chr10	35200218	chr1	62524654
chr1	58702110	chr10	35292933	chr1	62536106
chr1	58845227	chr10	35301786	chr1	62548392
chr1	58850848	chr10	35379493	chr1	62596712
chr1	58857654	chr10	35980870	chr1	62601352
chr1	58864607	chr10	38804228	chr1	62641223
chr1	59039387	chr10	39123501	chr1	62648881
chr1	59118248	chr10	42355387	chr1	62661738
chr1	59154957	chr10	42364609	chr1	62663776
chr1	59170342	chr10	42379657	chr1	62671695
chr1	59328472	chr10	42537923	chr1	62761967
chr1	59447015	chr10	42737226	chr1	62802925
chr1	59448382	chr10	43227715	chr1	62856894
chr1	59528942	chr10	43600837	chr1	62866622
chr1	59538419	chr10	44197249	chr1	62942120
chr1	59543271	chr10	44250138	chr1	62953518
chr1	59573649	chr10	44788263	chr1	62973935
chr1	59582357	chr10	44866313	chr1	63212132
chr1	59609511	chr10	45428249	chr1	63307247
chr1	59727298	chr10	45539796	chr1	63349992
chr1	59849954	chr10	45606912	chr1	63377824
chr1	59966455	chr10	46090159	chr1	63470467
chr1	59971321	chr10	46952116	chr1	63614771
chr1	60129629	chr10	47007795	chr1	63655293
chr1	60135663	chr10	49713500	chr1	63664206
chr1	60146326	chr10	49864077	chr1	63735310
chr1	60164068	chr10	50616463	chr1	63760283
chr1	60165048	chr10	50869520	chr1	63764921
chr1	60225192	chr10	52379043	chr1	63770630
chr1	60618702	chr10	53674776	chr1	63796296
chr1	60622582	chr10	53800213	chr1	63809530
chr1	60747106	chr10	53831223	chr1	63828395
chr1	61039368	chr10	54644021	chr1	63907139
chr1	61145277	chr10	54663353	chr1	64081399
chr1	61253506	chr10	54683309	chr1	64131641
chr1	61314794	chr10	54782245	chr1	64148708
chr1	61327516	chr10	55016342	chr1	64196945
chr1	61371609	chr10	55357589	chr1	64240823
chr1	61407027	chr10	58778338	chr1	64248721
chr1	61435731	chr10	58982272	chr1	64254984
chr1	61440252	chr10	59416872	chr1	64270457
chr1	61471204	chr10	60278125	chr1	64283587
chr1	61508600	chr10	60792435	chr1	64301900
chr1	61523919	chr10	61607162	chr1	64335883
chr1	61577340	chr10	61763384	chr1	64373734
chr1	61623476	chr10	62761071	chr1	64504950
chr1	61713940	chr10	63510710	chr1	64526820
chr1	61749907	chr10	63746174	chr1	64541723
chr1	61761550	chr10	64959551	chr1	64572938
chr1	61766560	chr10	65473049	chr1	64602654
chr1	61785301	chr10	65800962	chr1	64937512
chr1	61858127	chr10	65845949	chr1	64959279
chr1	61924634	chr10	66216477	chr1	64962973
chr1	61928149	chr10	67085714	chr1	64971976
chr1	61943015	chr10	68732969	chr1	64982307
chr1	61978437	chr10	69644066	chr1	64984238
chr1	62005529	chr10	69834770	chr1	65006034
chr1	62212546	chr10	70255713	chr1	65011777
chr1	62218512	chr10	70748195	chr1	65037697
chr1	62310428	chr10	71152303	chr1	65085962
chr1	62417143	chr10	71168541	chr1	65108760
chr1	62422484	chr10	72124188	chr1	65220863
chr1	62488118	chr10	72128624	chr1	65289959
chr1	62524480	chr10	72139238	chr1	65347441
chr1	62641365	chr10	72147149	chr1	65615040
chr1	62647300	chr10	72215094	chr1	65674844
chr1	62661712	chr10	72288706	chr1	65701710
chr1	62663846	chr10	72300227	chr1	65744539
chr1	62852064	chr10	72384057	chr1	65909924
chr1	62857162	chr10	72716027	chr1	66275732
chr1	62866730	chr10	73156273	chr1	66424555
chr1	62942126	chr10	73468064	chr1	66469276
chr1	62953577	chr10	73808184	chr1	66821926
chr1	62973841	chr10	74020516	chr1	66868894
chr1	63051112	chr10	74100265	chr1	66911875
chr1	63212234	chr10	74123978	chr1	66969616
chr1	63307246	chr10	74385640	chr1	66995630
chr1	63349905	chr10	74516795	chr1	67191754
chr1	63377833	chr10	75289029	chr1	67195789
chr1	63383846	chr10	75385529	chr1	67261968
chr1	63465009	chr10	75503645	chr1	67461698
chr1	63508003	chr10	75633950	chr1	67520241
chr1	63582481	chr10	75936328	chr1	67563084
chr1	63654866	chr10	76303936	chr1	67602928
chr1	63664582	chr10	76546693	chr1	67614823
chr1	63760263	chr10	76836273	chr1	67678940
chr1	63764904	chr10	77177241	chr1	67721838
chr1	63770642	chr10	77842901	chr1	67727201
chr1	63787126	chr10	77990744	chr1	67807651
chr1	63796308	chr10	79121938	chr1	67855401
chr1	63907232	chr10	79409599	chr1	67864672
chr1	64002797	chr10	79799462	chr1	67898024
chr1	64081573	chr10	80577439	chr1	67924169
chr1	64090784	chr10	80826999	chr1	67950218
chr1	64131629	chr10	81107084	chr1	67965986
chr1	64148670	chr10	82423900	chr1	67977392
chr1	64157653	chr10	82654027	chr1	67980996
chr1	64179992	chr10	83011287	chr1	67989879
chr1	64187604	chr10	83580321	chr1	67998208
chr1	64196922	chr10	83607519	chr1	68067431
chr1	64240710	chr10	85519817	chr1	68211457
chr1	64248499	chr10	85946086	chr1	68305986
chr1	64255132	chr10	86327361	chr1	68358548
chr1	64270458	chr10	86425758	chr1	68475654
chr1	64283407	chr10	86911065	chr1	68577601
chr1	64301661	chr10	87373616	chr1	68582308
chr1	64309640	chr10	87651239	chr1	68676531
chr1	64323696	chr10	88137004	chr1	68698768
chr1	64373745	chr10	88183535	chr1	68744001
chr1	64505159	chr10	88298139	chr1	68812022
chr1	64526800	chr10	88511305	chr1	68829600
chr1	64541725	chr10	88628064	chr1	68908743
chr1	64572871	chr10	88713883	chr1	68939611
chr1	64602692	chr10	88726375	chr1	69065516
chr1	64612399	chr10	90498210	chr1	69066483
chr1	64621004	chr10	90789660	chr1	69081026
chr1	64642402	chr10	91011537	chr1	69435267
chr1	64770614	chr10	91318654	chr1	69436071
chr1	64823017	chr10	91461122	chr1	69542178
chr1	64844430	chr10	92079390	chr1	69547933
chr1	64937513	chr10	92685347	chr1	69559177
chr1	64952818	chr10	93311704	chr1	69586369
chr1	64954553	chr10	93847420	chr1	69664489
chr1	64959148	chr10	94147171	chr1	69699650
chr1	64963040	chr10	94799384	chr1	69710036
chr1	64972049	chr10	94825639	chr1	69786786
chr1	64984239	chr10	95032786	chr1	70209950
chr1	64989660	chr10	95040546	chr1	70218234
chr1	64992885	chr10	95048842	chr1	70311101
chr1	65006213	chr10	95376915	chr1	70455442
chr1	65018962	chr10	95462170	chr1	70499865
chr1	65037934	chr10	95601708	chr1	70875580
chr1	65051636	chr10	97889609	chr1	70908104
chr1	65097390	chr10	97989362	chr1	70953668
chr1	65108804	chr10	98069569	chr1	70975849
chr1	65177687	chr10	98100188	chr1	71012370
chr1	65220862	chr10	99096695	chr1	71022142
chr1	65268664	chr10	99313246	chr1	71053200
chr1	65289960	chr10	99331995	chr1	71073453
chr1	65347365	chr10	99408412	chr1	71202925
chr1	65447369	chr10	99491471	chr1	71515642
chr1	65491662	chr10	100844085	chr1	71566021
chr1	65615045	chr10	101152837	chr1	71823384
chr1	65701719	chr10	101544676	chr1	71880272
chr1	65731003	chr10	101605519	chr1	71927871
chr1	65744531	chr10	101673503	chr1	72085345
chr1	65796611	chr10	101677758	chr1	72353496
chr1	65898531	chr10	102321715	chr1	72374694
chr1	65909920	chr10	102397530	chr1	72379547
chr1	66424515	chr10	102974563	chr1	72385296
chr1	66469371	chr10	103113548	chr1	72488884
chr1	66724028	chr10	103340736	chr1	72520908
chr1	66797327	chr10	103362629	chr1	72705169
chr1	66801404	chr10	103467775	chr1	73013055
chr1	66815605	chr10	103911744	chr1	73088868
chr1	67134669	chr10	104102117	chr1	73136456
chr1	67196068	chr10	104192110	chr1	73312299
chr1	67461615	chr10	104420883	chr1	73452200
chr1	67485269	chr10	104438585	chr1	73531057
chr1	67523998	chr10	104513046	chr1	73563471
chr1	67563070	chr10	104563180	chr1	73659063
chr1	67602923	chr10	104874708	chr1	73857581
chr1	67721836	chr10	104964512	chr1	74195687
chr1	67726998	chr10	105314896	chr1	74395933
chr1	67734909	chr10	105396397	chr1	74408967
chr1	67798468	chr10	106823645	chr1	74464108
chr1	67807642	chr10	107435274	chr1	74582263
chr1	67855591	chr10	109024666	chr1	74710728
chr1	67864709	chr10	109308057	chr1	74832625
chr1	67898030	chr10	111607743	chr1	74934755
chr1	67924174	chr10	111928788	chr1	74968048
chr1	67929432	chr10	111975778	chr1	75155520
chr1	67950150	chr10	112316868	chr1	75199230
chr1	67965993	chr10	112371601	chr1	75218903
chr1	67977393	chr10	112896724	chr1	75237710
chr1	67981074	chr10	114592194	chr1	75280489
chr1	67989934	chr10	114672894	chr1	75340255
chr1	68121309	chr10	114813802	chr1	75401132
chr1	68211489	chr10	114833421	chr1	75518867
chr1	68306090	chr10	115323288	chr1	75540395
chr1	68319415	chr10	115346077	chr1	75548782
chr1	68358378	chr10	115464848	chr1	75601370
chr1	68475734	chr10	116097516	chr1	75699139
chr1	68593817	chr10	116297865	chr1	75722939
chr1	68617454	chr10	116310555	chr1	75808438
chr1	68682829	chr10	116640730	chr1	76046827
chr1	68698830	chr10	116677577	chr1	76095400
chr1	68742084	chr10	117755577	chr1	76097993
chr1	68743971	chr10	118315050	chr1	76185482
chr1	68759614	chr10	118609093	chr1	76251756
chr1	68808512	chr10	118976218	chr1	76374238
chr1	68908778	chr10	119779981	chr1	76547885
chr1	68930662	chr10	120000690	chr1	76605872
chr1	68944470	chr10	120353950	chr1	76619937
chr1	68958866	chr10	121176523	chr1	76651801
chr1	69066445	chr10	121269361	chr1	76696276
chr1	69081099	chr10	121446608	chr1	76967210
chr1	69090505	chr10	121652022	chr1	77048759
chr1	69116784	chr10	122037563	chr1	77194514
chr1	69315934	chr10	122702287	chr1	77223310
chr1	69436215	chr10	123100240	chr1	77307095
chr1	69442925	chr10	123650740	chr1	77319860
chr1	69445520	chr10	124671488	chr1	77411991
chr1	69542156	chr10	124713290	chr1	77436855
chr1	69547407	chr10	125229991	chr1	77530058
chr1	69547926	chr10	126218787	chr1	77547783
chr1	69611627	chr10	126480164	chr1	77685178
chr1	69709824	chr10	127849895	chr1	77730826
chr1	70155904	chr10	128437652	chr1	77882616
chr1	70209948	chr10	129078839	chr1	77999351
chr1	70218160	chr10	129398887	chr1	78245136
chr1	70311195	chr10	129924537	chr1	78366407
chr1	70455499	chr10	129948139	chr1	78427384
chr1	70499966	chr10	131065629	chr1	78437755
chr1	70557702	chr10	131156350	chr1	78470146
chr1	70599981	chr10	131329973	chr1	78567192
chr1	70908303	chr10	131463394	chr1	78579907
chr1	70953649	chr10	131675138	chr1	78620726
chr1	70975751	chr10	131765524	chr1	78643769
chr1	71012374	chr10	131843424	chr1	78773513
chr1	71022205	chr10	131955746	chr1	79072902
chr1	71053411	chr10	131992020	chr1	79083120
chr1	71150866	chr10	132199281	chr1	79141882
chr1	71312835	chr10	132282538	chr1	79154403
chr1	71515728	chr10	132584770	chr1	79263095
chr1	71632253	chr10	132611599	chr1	79499859
chr1	71700682	chr10	132800722	chr1	79658794
chr1	71903721	chr10	132847398	chr1	79728265
chr1	71927867	chr10	133819633	chr1	79801350
chr1	71936299	chr10	133962921	chr1	79950209
chr1	72204576	chr10	134145493	chr1	79997585
chr1	72240773	chr10	134649359	chr1	80020958
chr1	72353370	chr10	135002108	chr1	80182235
chr1	72374703	chr10	135048085	chr1	80236024
chr1	72385313	chr10	135087862	chr1	80373976
chr1	72489076	chr10	135130067	chr1	80402544
chr1	73012982	chr11	267175	chr1	80444987
chr1	73088980	chr11	662705	chr1	80566385
chr1	73103779	chr11	720641	chr1	80647018
chr1	73136705	chr11	743887	chr1	80804691
chr1	73303531	chr11	746840	chr1	80923176
chr1	73312273	chr11	755349	chr1	80971849
chr1	73452157	chr11	765388	chr1	80999419
chr1	73531115	chr11	832915	chr1	81070184
chr1	73563453	chr11	934557	chr1	81123367
chr1	73608211	chr11	944694	chr1	81285594
chr1	73653385	chr11	1083623	chr1	81302694
chr1	73694008	chr11	1133091	chr1	81486271
chr1	74009537	chr11	1357460	chr1	81537873
chr1	74058986	chr11	1428074	chr1	81609939
chr1	74167721	chr11	1574073	chr1	81622554
chr1	74195678	chr11	1649986	chr1	81703811
chr1	74395975	chr11	1673843	chr1	81730220
chr1	74408857	chr11	2360648	chr1	81771320
chr1	74463989	chr11	3245168	chr1	81778006
chr1	74582268	chr11	3599258	chr1	81843056
chr1	74710775	chr11	3883065	chr1	81872876
chr1	74781841	chr11	5278594	chr1	81880106
chr1	74833941	chr11	5402076	chr1	81896969
chr1	74857865	chr11	5829698	chr1	81919740
chr1	74932287	chr11	6324966	chr1	81933036
chr1	74934752	chr11	6384365	chr1	81972358
chr1	75155593	chr11	6400561	chr1	82012975
chr1	75187940	chr11	6406208	chr1	82021521
chr1	75199249	chr11	6448841	chr1	82147869
chr1	75218788	chr11	6682651	chr1	82164796
chr1	75311451	chr11	7687055	chr1	82246244
chr1	75340286	chr11	8214064	chr1	82263122
chr1	75519019	chr11	9253414	chr1	82269635
chr1	75540300	chr11	9540418	chr1	82314427
chr1	75548627	chr11	9697215	chr1	82386057
chr1	75601361	chr11	9927623	chr1	82513506
chr1	75628503	chr11	10373277	chr1	82620095
chr1	75808415	chr11	10388293	chr1	82686316
chr1	75948475	chr11	10529411	chr1	82951040
chr1	76095644	chr11	10530670	chr1	83062894
chr1	76185417	chr11	10531409	chr1	83129727
chr1	76192119	chr11	10813986	chr1	83226035
chr1	76484141	chr11	11102710	chr1	83244343
chr1	76518746	chr11	11650327	chr1	83279080
chr1	76537207	chr11	11820342	chr1	83312742
chr1	76556862	chr11	12310268	chr1	84158474
chr1	76696280	chr11	12662318	chr1	84253206
chr1	76715996	chr11	12709305	chr1	84311792
chr1	76768994	chr11	13356809	chr1	84564020
chr1	76817631	chr11	14362184	chr1	84588292
chr1	76871801	chr11	14369678	chr1	84649646
chr1	76945890	chr11	15202157	chr1	84754918
chr1	76967250	chr11	15389147	chr1	84769094
chr1	77048773	chr11	15580113	chr1	84907862
chr1	77223304	chr11	16841792	chr1	85037558
chr1	77232091	chr11	17085090	chr1	85049885
chr1	77279200	chr11	17620567	chr1	85181100
chr1	77307199	chr11	17752691	chr1	85229545
chr1	77320000	chr11	17785296	chr1	85357972
chr1	77366820	chr11	19416645	chr1	85401775
chr1	77412083	chr11	19579270	chr1	85410662
chr1	77436905	chr11	19794031	chr1	85508136
chr1	77525737	chr11	19798626	chr1	85515740
chr1	77547718	chr11	20022064	chr1	85611108
chr1	77613859	chr11	20268974	chr1	85667785
chr1	77730780	chr11	20934913	chr1	85742595
chr1	77863743	chr11	22256348	chr1	85809546
chr1	77913318	chr11	22392654	chr1	85859036
chr1	77980155	chr11	22897452	chr1	85912531
chr1	77980584	chr11	23980961	chr1	85940157
chr1	78366448	chr11	25755435	chr1	85992831
chr1	78437761	chr11	26298509	chr1	86049861
chr1	78580057	chr11	26318806	chr1	86063412
chr1	78620857	chr11	27350254	chr1	86072933
chr1	78643780	chr11	27465358	chr1	86158398
chr1	78690752	chr11	29549328	chr1	86483941
chr1	78693452	chr11	29969903	chr1	86622044
chr1	78702965	chr11	29981037	chr1	86658313
chr1	78729247	chr11	30047030	chr1	86781636
chr1	78732638	chr11	30567817	chr1	86885120
chr1	78773625	chr11	31821417	chr1	86939611
chr1	78997051	chr11	31885030	chr1	87012646
chr1	79083163	chr11	31964621	chr1	87057253
chr1	79262706	chr11	32605111	chr1	87207602
chr1	79350163	chr11	33143582	chr1	87299027
chr1	79658960	chr11	33155467	chr1	87430809
chr1	79663215	chr11	33705693	chr1	87490835
chr1	79728268	chr11	34009493	chr1	87582456
chr1	79950269	chr11	34182733	chr1	87666643
chr1	80129375	chr11	34379344	chr1	87692141
chr1	80374037	chr11	34607640	chr1	87758574
chr1	80444993	chr11	35133918	chr1	87791676
chr1	80646988	chr11	35201846	chr1	87796522
chr1	80683170	chr11	36131511	chr1	87978780
chr1	80804715	chr11	36310889	chr1	88108204
chr1	80831625	chr11	36724210	chr1	88139451
chr1	80923058	chr11	37619320	chr1	88188769
chr1	80971814	chr11	37949824	chr1	88329112
chr1	80975622	chr11	38676834	chr1	88419417
chr1	80999293	chr11	42617501	chr1	88439640
chr1	81070188	chr11	44560104	chr1	88527175
chr1	81123410	chr11	44580879	chr1	88544805
chr1	81142692	chr11	44775491	chr1	88601112
chr1	81452667	chr11	44797003	chr1	88646149
chr1	81486070	chr11	44819560	chr1	88761461
chr1	81537752	chr11	45132188	chr1	88762395
chr1	81609726	chr11	45838214	chr1	88796406
chr1	81622566	chr11	45874263	chr1	88860749
chr1	81678975	chr11	46027997	chr1	89000233
chr1	81703770	chr11	46330204	chr1	89032032
chr1	81730748	chr11	46559498	chr1	89266057
chr1	81771637	chr11	46958060	chr1	89357131
chr1	81778189	chr11	47600289	chr1	89401500
chr1	81801580	chr11	47677230	chr1	89439204
chr1	81814519	chr11	48021545	chr1	89449627
chr1	81834999	chr11	56427260	chr1	89450300
chr1	81843208	chr11	57143811	chr1	89464498
chr1	81872935	chr11	57406526	chr1	89479243
chr1	81875894	chr11	57508570	chr1	89551469
chr1	81880196	chr11	57635929	chr1	89676594
chr1	81896952	chr11	58903466	chr1	89948747
chr1	81919678	chr11	60609471	chr1	89996154
chr1	81972492	chr11	60883863	chr1	90032157
chr1	82012842	chr11	61267674	chr1	90182556
chr1	82021560	chr11	61405854	chr1	90219934
chr1	82084923	chr11	61500955	chr1	90267559
chr1	82129880	chr11	61666676	chr1	90302441
chr1	82147876	chr11	61715060	chr1	90329549
chr1	82164996	chr11	62159234	chr1	90376184
chr1	82199115	chr11	62194065	chr1	90384064
chr1	82246262	chr11	62328045	chr1	90398593
chr1	82263025	chr11	62389474	chr1	90446140
chr1	82269849	chr11	62528808	chr1	90511674
chr1	82285260	chr11	62623242	chr1	90580106
chr1	82314402	chr11	62648675	chr1	90999944
chr1	82386088	chr11	62788174	chr1	91003443
chr1	82402619	chr11	62791643	chr1	91027173
chr1	82430834	chr11	63216214	chr1	91044867
chr1	82432111	chr11	63299702	chr1	91057531
chr1	82606963	chr11	63403358	chr1	91189812
chr1	82620114	chr11	63604789	chr1	91193273
chr1	82794847	chr11	63685309	chr1	91274617
chr1	82827782	chr11	63706006	chr1	91304186
chr1	82951775	chr11	63789325	chr1	91356097
chr1	83062903	chr11	64001750	chr1	91392370
chr1	83086700	chr11	64257384	chr1	91429911
chr1	83129575	chr11	64333984	chr1	91570464
chr1	83136635	chr11	64410740	chr1	91585872
chr1	83226060	chr11	64456267	chr1	91589161
chr1	83271707	chr11	64863314	chr1	91607382
chr1	83313661	chr11	65183907	chr1	91710985
chr1	83476032	chr11	65236449	chr1	91744104
chr1	83568234	chr11	65479426	chr1	91748394
chr1	84040494	chr11	65557499	chr1	91852717
chr1	84061055	chr11	65652152	chr1	91976966
chr1	84158079	chr11	65686450	chr1	92097526
chr1	84253030	chr11	65769541	chr1	92110275
chr1	84501240	chr11	65779910	chr1	92217852
chr1	84737382	chr11	65816665	chr1	92256727
chr1	84754915	chr11	65990264	chr1	92299479
chr1	84795171	chr11	66175912	chr1	92536506
chr1	84857270	chr11	66197608	chr1	92546845
chr1	84902674	chr11	66206310	chr1	92756887
chr1	84944602	chr11	66277986	chr1	92775746
chr1	85028518	chr11	66314255	chr1	92868586
chr1	85037662	chr11	66445944	chr1	92927248
chr1	85049971	chr11	66462212	chr1	93201937
chr1	85141259	chr11	66495414	chr1	93240085
chr1	85163644	chr11	66610528	chr1	93250815
chr1	85222433	chr11	66636228	chr1	93257536
chr1	85229538	chr11	66754759	chr1	93297252
chr1	85247781	chr11	66773826	chr1	93309158
chr1	85357936	chr11	67118638	chr1	93324223
chr1	85360234	chr11	67195810	chr1	93459573
chr1	85508128	chr11	67426937	chr1	93487239
chr1	85515743	chr11	68084924	chr1	93544468
chr1	85672409	chr11	68214558	chr1	93554860
chr1	85809307	chr11	68400381	chr1	93590361
chr1	85858963	chr11	68899122	chr1	93703757
chr1	85940051	chr11	69455576	chr1	93790224
chr1	85968487	chr11	69634144	chr1	93875813
chr1	86025712	chr11	70042244	chr1	94018560
chr1	86049738	chr11	70493395	chr1	94059709
chr1	86063000	chr11	70601752	chr1	94094935
chr1	86072988	chr11	70724172	chr1	94101804
chr1	86094560	chr11	71823546	chr1	94234841
chr1	86158552	chr11	72069839	chr1	94272858
chr1	86441833	chr11	72284375	chr1	94279620
chr1	86483912	chr11	72542636	chr1	94294531
chr1	86566108	chr11	73205410	chr1	94309884
chr1	86660911	chr11	73372024	chr1	94354275
chr1	86781648	chr11	73472178	chr1	94374967
chr1	86860878	chr11	73490456	chr1	94385321
chr1	86939665	chr11	74099663	chr1	94545169
chr1	87207708	chr11	74450934	chr1	94579384
chr1	87219509	chr11	75110408	chr1	94725094
chr1	87289626	chr11	75156312	chr1	94801298
chr1	87334571	chr11	75351214	chr1	94891414
chr1	87345301	chr11	75514333	chr1	94947061
chr1	87388176	chr11	75525714	chr1	94993898
chr1	87404465	chr11	75863307	chr1	95126302
chr1	87490838	chr11	75891329	chr1	95132322
chr1	87538057	chr11	76159409	chr1	95154168
chr1	87583097	chr11	76432901	chr1	95179559
chr1	87614887	chr11	76494761	chr1	95352737
chr1	87666648	chr11	76518453	chr1	95359902
chr1	87791592	chr11	76802124	chr1	95402262
chr1	87796493	chr11	76903027	chr1	95420195
chr1	87903011	chr11	76909732	chr1	95508945
chr1	87918421	chr11	77587207	chr1	95582361
chr1	88108200	chr11	77705543	chr1	95609163
chr1	88108867	chr11	77790821	chr1	95712063
chr1	88151055	chr11	78356287	chr1	95717611
chr1	88188778	chr11	78640522	chr1	95873373
chr1	88329113	chr11	82297613	chr1	95903816
chr1	88407020	chr11	82406838	chr1	95916420
chr1	88439656	chr11	83733212	chr1	95970475
chr1	88527276	chr11	84148489	chr1	95983922
chr1	88583749	chr11	85181923	chr1	96048255
chr1	88601109	chr11	85194944	chr1	96196832
chr1	88761695	chr11	85237726	chr1	96354732
chr1	88762407	chr11	85565913	chr1	96382017
chr1	88860576	chr11	87003665	chr1	96468902
chr1	88870220	chr11	87132468	chr1	96652480
chr1	89000223	chr11	87204627	chr1	96701661
chr1	89032137	chr11	88041268	chr1	96724764
chr1	89239883	chr11	88053259	chr1	96783244
chr1	89243249	chr11	90062993	chr1	96940806
chr1	89266254	chr11	92044885	chr1	96948021
chr1	89343147	chr11	92244924	chr1	96987814
chr1	89357251	chr11	92283662	chr1	97009861
chr1	89551533	chr11	92434934	chr1	97025197
chr1	89786782	chr11	92438616	chr1	97047403
chr1	89843700	chr11	92805451	chr1	97092887
chr1	89996153	chr11	92850374	chr1	97140590
chr1	90032069	chr11	92967878	chr1	97181136
chr1	90041709	chr11	93654999	chr1	97515918
chr1	90267437	chr11	93916871	chr1	97518371
chr1	90274433	chr11	94058886	chr1	97564247
chr1	90329318	chr11	94383157	chr1	97580185
chr1	90376188	chr11	94630395	chr1	97603711
chr1	90384066	chr11	94968348	chr1	97709580
chr1	90398492	chr11	95569279	chr1	97991048
chr1	90410181	chr11	95986547	chr1	98535319
chr1	90415690	chr11	96076347	chr1	98552387
chr1	90421321	chr11	96240101	chr1	98924032
chr1	90446231	chr11	96764946	chr1	98968197
chr1	90580102	chr11	97029864	chr1	99142560
chr1	90664223	chr11	97727589	chr1	99598307
chr1	90748457	chr11	99796741	chr1	99603123
chr1	90792215	chr11	100661924	chr1	99801454
chr1	90966699	chr11	102079668	chr1	100173111
chr1	90975091	chr11	102151192	chr1	100231940
chr1	90986415	chr11	102678820	chr1	100274219
chr1	91003488	chr11	103279155	chr1	100303123
chr1	91027094	chr11	104125073	chr1	100352160
chr1	91044911	chr11	104255266	chr1	100613441
chr1	91130870	chr11	105692530	chr1	100718512
chr1	91179587	chr11	105947639	chr1	100728892
chr1	91193218	chr11	106197976	chr1	100770324
chr1	91274487	chr11	108368473	chr1	100790644
chr1	91298757	chr11	111249720	chr1	100927613
chr1	91304207	chr11	111446218	chr1	100951422
chr1	91307676	chr11	111472732	chr1	101333955
chr1	91319637	chr11	111527682	chr1	101483121
chr1	91356008	chr11	111749820	chr1	101602493
chr1	91363160	chr11	111802596	chr1	101753697
chr1	91392599	chr11	111807539	chr1	101823032
chr1	91439863	chr11	111831669	chr1	101939593
chr1	91483511	chr11	112045822	chr1	101972261
chr1	91532257	chr11	112124952	chr1	102098336
chr1	91570208	chr11	113803634	chr1	102179268
chr1	91585844	chr11	114348803	chr1	102285665
chr1	91589239	chr11	114643920	chr1	102308469
chr1	91607429	chr11	115034966	chr1	102372620
chr1	91710796	chr11	115261051	chr1	102521847
chr1	91744290	chr11	115854764	chr1	102608547
chr1	91748348	chr11	116451568	chr1	102657356
chr1	91852713	chr11	116562453	chr1	102713864
chr1	91977088	chr11	116580692	chr1	102900008
chr1	92030581	chr11	116643475	chr1	102954072
chr1	92076718	chr11	116750559	chr1	103068208
chr1	92110269	chr11	116765851	chr1	103122144
chr1	92230006	chr11	117138767	chr1	103241767
chr1	92256638	chr11	117383251	chr1	103491577
chr1	92655877	chr11	117541677	chr1	103575492
chr1	92775751	chr11	117689881	chr1	103716507
chr1	92796470	chr11	118042418	chr1	104057587
chr1	93088742	chr11	118530174	chr1	104163703
chr1	93250821	chr11	118800919	chr1	104330958
chr1	93257937	chr11	118972802	chr1	104398283
chr1	93297426	chr11	119461454	chr1	104635123
chr1	93466602	chr11	119928537	chr1	104674948
chr1	93566084	chr11	120105852	chr1	105190806
chr1	93590208	chr11	120206795	chr1	105522758
chr1	93704027	chr11	120372199	chr1	105715521
chr1	93740317	chr11	120530879	chr1	106336066
chr1	93766850	chr11	120823639	chr1	106565012
chr1	93795780	chr11	120827948	chr1	106744895
chr1	93876335	chr11	120894634	chr1	106810779
chr1	93897875	chr11	121243663	chr1	106829425
chr1	93981816	chr11	121276924	chr1	107066211
chr1	94018489	chr11	121514608	chr1	107252869
chr1	94059559	chr11	121562744	chr1	107512206
chr1	94101782	chr11	121593079	chr1	107518529
chr1	94111327	chr11	122177763	chr1	107527586
chr1	94234874	chr11	122877700	chr1	107558351
chr1	94273039	chr11	123376693	chr1	107690218
chr1	94279454	chr11	123447760	chr1	107723872
chr1	94286320	chr11	123451198	chr1	107819677
chr1	94309885	chr11	123578413	chr1	107973255
chr1	94354275	chr11	124543447	chr1	108072132
chr1	94375136	chr11	124910761	chr1	108305318
chr1	94385406	chr11	124993960	chr1	108324824
chr1	94477258	chr11	125011406	chr1	108347228
chr1	94516144	chr11	125016205	chr1	108409669
chr1	94534559	chr11	125109784	chr1	108668067
chr1	94544949	chr11	125274828	chr1	109055057
chr1	94558872	chr11	125811891	chr1	109127268
chr1	94579378	chr11	126173808	chr1	109222318
chr1	94725094	chr11	126979761	chr1	109323703
chr1	94781384	chr11	127659931	chr1	109384958
chr1	94785339	chr11	127901521	chr1	109618829
chr1	94801325	chr11	128452532	chr1	109709569
chr1	94860738	chr11	128603598	chr1	109772273
chr1	94891405	chr11	128729847	chr1	109802499
chr1	94993991	chr11	128740880	chr1	109908899
chr1	95017521	chr11	128826265	chr1	109941770
chr1	95125973	chr11	129054374	chr1	110011354
chr1	95132330	chr11	129233981	chr1	110094789
chr1	95154190	chr11	129323207	chr1	110283724
chr1	95164787	chr11	129620741	chr1	110375669
chr1	95267580	chr11	130786307	chr1	110502446
chr1	95330159	chr11	130934397	chr1	110554361
chr1	95353288	chr11	131087954	chr1	110914702
chr1	95359902	chr11	131468228	chr1	110992467
chr1	95373947	chr11	131558048	chr1	111002997
chr1	95402264	chr11	131671990	chr1	111037283
chr1	95420365	chr11	132182588	chr1	111085482
chr1	95508909	chr11	132852826	chr1	111158458
chr1	95712252	chr11	133004521	chr1	111294848
chr1	95717356	chr11	133010514	chr1	111470029
chr1	95747612	chr11	133196410	chr1	111762130
chr1	95777800	chr11	134094444	chr1	111814846
chr1	95850229	chr11	134609334	chr1	112080957
chr1	95873396	chr12	510563	chr1	112084472
chr1	95903729	chr12	970038	chr1	112282653
chr1	95916561	chr12	1529143	chr1	112289832
chr1	95941179	chr12	1743867	chr1	112292147
chr1	95970469	chr12	1770957	chr1	112312195
chr1	95983885	chr12	2113455	chr1	112453596
chr1	96048261	chr12	2144067	chr1	112549681
chr1	96189003	chr12	2469297	chr1	112635786
chr1	96215745	chr12	3053921	chr1	112781933
chr1	96269929	chr12	3186458	chr1	112912388
chr1	96307810	chr12	3559953	chr1	112916952
chr1	96354569	chr12	3907784	chr1	112946861
chr1	96468374	chr12	4134514	chr1	112966876
chr1	96526054	chr12	4829836	chr1	113337346
chr1	96546576	chr12	5112232	chr1	113351770
chr1	96562183	chr12	5905748	chr1	113360479
chr1	96630289	chr12	6387831	chr1	113370168
chr1	96652598	chr12	6484447	chr1	113376130
chr1	96671804	chr12	6532710	chr1	113388009
chr1	96701837	chr12	6930700	chr1	113454260
chr1	96714745	chr12	6961628	chr1	113497764
chr1	96724789	chr12	7029460	chr1	113569765
chr1	96783359	chr12	7036989	chr1	113584347
chr1	96929750	chr12	7079782	chr1	113596598
chr1	96940871	chr12	7243233	chr1	113614832
chr1	96948053	chr12	7847167	chr1	113691573
chr1	96987829	chr12	8184984	chr1	113702446
chr1	97009907	chr12	8606274	chr1	113742113
chr1	97025165	chr12	10610478	chr1	113797596
chr1	97027691	chr12	11381158	chr1	113798304
chr1	97047263	chr12	11761988	chr1	113819120
chr1	97181080	chr12	12122683	chr1	114090230
chr1	97311117	chr12	12286708	chr1	114223733
chr1	97392680	chr12	12341426	chr1	114300887
chr1	97417579	chr12	12419686	chr1	114313153
chr1	97456075	chr12	12829597	chr1	114354788
chr1	97516101	chr12	13069160	chr1	114378288
chr1	97518528	chr12	13241399	chr1	114488846
chr1	97564248	chr12	13408734	chr1	114519546
chr1	97580412	chr12	13902379	chr1	114551134
chr1	97603765	chr12	14436696	chr1	114577272
chr1	97683105	chr12	14783182	chr1	114580446
chr1	98032591	chr12	17092776	chr1	114592742
chr1	98047402	chr12	19614907	chr1	114618263
chr1	98509235	chr12	19833572	chr1	114688284
chr1	98552282	chr12	20704277	chr1	114708484
chr1	98670737	chr12	21927637	chr1	114931303
chr1	98675591	chr12	23069333	chr1	115124054
chr1	98718629	chr12	23207925	chr1	115178844
chr1	98924072	chr12	23738734	chr1	115521866
chr1	98968362	chr12	23910483	chr1	115594979
chr1	99023461	chr12	24368835	chr1	115625345
chr1	99214746	chr12	24462104	chr1	115841901
chr1	99318321	chr12	25307984	chr1	116150762
chr1	99399135	chr12	26663292	chr1	116260100
chr1	99452915	chr12	26796696	chr1	116306903
chr1	99598368	chr12	26855261	chr1	116339647
chr1	99602995	chr12	27588205	chr1	116502971
chr1	99718069	chr12	28613363	chr1	116524045
chr1	99774058	chr12	28912287	chr1	116575896
chr1	99793011	chr12	31556007	chr1	116681661
chr1	100054820	chr12	31650640	chr1	116805601
chr1	100089073	chr12	31835010	chr1	116877755
chr1	100111949	chr12	32120485	chr1	116902159
chr1	100232076	chr12	32166475	chr1	116915053
chr1	100352310	chr12	32169931	chr1	116940224
chr1	100423405	chr12	32607125	chr1	116961290
chr1	100542000	chr12	38543736	chr1	117027832
chr1	100613457	chr12	39638065	chr1	117041792
chr1	100766330	chr12	39787779	chr1	117117197
chr1	100770517	chr12	39845764	chr1	117279901
chr1	100921156	chr12	41757377	chr1	117374582
chr1	100927578	chr12	41833335	chr1	117385271
chr1	101009296	chr12	42418058	chr1	117396394
chr1	101313110	chr12	42634353	chr1	117451387
chr1	101326066	chr12	42879575	chr1	117558865
chr1	101415547	chr12	42904717	chr1	117671106
chr1	101483122	chr12	42963064	chr1	117714566
chr1	101534622	chr12	43150669	chr1	117811633
chr1	101602472	chr12	43379375	chr1	117815447
chr1	101775358	chr12	43666114	chr1	117827308
chr1	101950112	chr12	44217551	chr1	117855114
chr1	102098519	chr12	44351600	chr1	117878291
chr1	102170424	chr12	46384233	chr1	117888935
chr1	102178876	chr12	46888226	chr1	118296765
chr1	102308373	chr12	48357018	chr1	118438211
chr1	102372727	chr12	48551221	chr1	118540220
chr1	102521851	chr12	49110437	chr1	118567355
chr1	102571616	chr12	49359162	chr1	118693936
chr1	102572804	chr12	49453719	chr1	118730312
chr1	102657407	chr12	50092334	chr1	118790266
chr1	103241703	chr12	50221550	chr1	119297384
chr1	103491586	chr12	50276942	chr1	119471313
chr1	103715842	chr12	50297802	chr1	119502897
chr1	104004327	chr12	52386887	chr1	119551153
chr1	104331075	chr12	52414633	chr1	119585393
chr1	104484707	chr12	52444960	chr1	119818088
chr1	104635122	chr12	52550675	chr1	119868926
chr1	104675027	chr12	53273263	chr1	119883223
chr1	104706622	chr12	53370042	chr1	120217822
chr1	104833791	chr12	53374719	chr1	120221903
chr1	105031375	chr12	53440825	chr1	120491150
chr1	105190849	chr12	53574388	chr1	120502649
chr1	105596513	chr12	54611499	chr1	121484061
chr1	105715528	chr12	54773516	chr1	142535492
chr1	105729743	chr12	54846554	chr1	144533941
chr1	105905810	chr12	55258112	chr1	144913704
chr1	105932176	chr12	55391575	chr1	144936471
chr1	105995513	chr12	55437893	chr1	145058876
chr1	106005190	chr12	56140560	chr1	145092302
chr1	106082849	chr12	56367743	chr1	145112633
chr1	106336259	chr12	56435364	chr1	145382591
chr1	106829570	chr12	56511707	chr1	145421621
chr1	106978946	chr12	56551699	chr1	145437849
chr1	107057934	chr12	56862220	chr1	145457231
chr1	107066049	chr12	56987972	chr1	146555883
chr1	107252896	chr12	57403702	chr1	146807955
chr1	107279326	chr12	57637283	chr1	146987298
chr1	107288952	chr12	57849949	chr1	147013001
chr1	107406862	chr12	58146073	chr1	147039471
chr1	107518704	chr12	58150673	chr1	147059221
chr1	107558534	chr12	58176275	chr1	147196177
chr1	107717773	chr12	58299173	chr1	147253026
chr1	107723648	chr12	58335189	chr1	147309299
chr1	107798180	chr12	58679447	chr1	147362245
chr1	107819494	chr12	58848147	chr1	147364792
chr1	107828403	chr12	58934216	chr1	147735738
chr1	107974743	chr12	59543844	chr1	147737187
chr1	107990953	chr12	59631568	chr1	147806346
chr1	108057130	chr12	59894187	chr1	148241294
chr1	108066404	chr12	60268688	chr1	149035300
chr1	108072129	chr12	60518024	chr1	149223620
chr1	108113019	chr12	61190596	chr1	149821620
chr1	108196413	chr12	61228696	chr1	149859424
chr1	108305315	chr12	62387582	chr1	149989238
chr1	108347234	chr12	62635818	chr1	150022350
chr1	108371791	chr12	63053115	chr1	150186249
chr1	108409683	chr12	63617619	chr1	150209059
chr1	108419677	chr12	64264589	chr1	150228666
chr1	108478842	chr12	64937195	chr1	150241426
chr1	108594709	chr12	65048354	chr1	150253318
chr1	108600286	chr12	65161499	chr1	150361808
chr1	108741741	chr12	65283178	chr1	150400947
chr1	108859165	chr12	65449597	chr1	150402345
chr1	109055225	chr12	65950436	chr1	150488968
chr1	109289851	chr12	67340485	chr1	150540031
chr1	109385091	chr12	68042219	chr1	150569447
chr1	109404884	chr12	68617009	chr1	150577059
chr1	109490570	chr12	68769978	chr1	150582239
chr1	109743702	chr12	69552540	chr1	150593973
chr1	109748209	chr12	69722311	chr1	150641352
chr1	109757530	chr12	69809503	chr1	150849307
chr1	109772177	chr12	70273259	chr1	150885217
chr1	109780154	chr12	70754436	chr1	150894559
chr1	109820127	chr12	71115907	chr1	150898415
chr1	109903336	chr12	71950146	chr1	151061519
chr1	109941952	chr12	72343204	chr1	151072383
chr1	110011474	chr12	72410912	chr1	151168736
chr1	110316352	chr12	72608135	chr1	151267397
chr1	110375568	chr12	72964475	chr1	151273441
chr1	110407651	chr12	74024383	chr1	151313219
chr1	110502556	chr12	75431489	chr1	151371747
chr1	110502967	chr12	75728105	chr1	151416421
chr1	110716094	chr12	76028075	chr1	151499277
chr1	110881455	chr12	76338040	chr1	151559795
chr1	110955119	chr12	76363771	chr1	151566448
chr1	110992486	chr12	76449265	chr1	151689131
chr1	111002877	chr12	76890960	chr1	151707470
chr1	111037511	chr12	77459528	chr1	151809012
chr1	111059312	chr12	78031670	chr1	151833373
chr1	111099426	chr12	78038875	chr1	151882445
chr1	111294882	chr12	79045606	chr1	151909214
chr1	111682000	chr12	80178006	chr1	151991113
chr1	111761999	chr12	81078081	chr1	152016267
chr1	111814860	chr12	81240734	chr1	152040402
chr1	111928269	chr12	82152771	chr1	153643441
chr1	112050952	chr12	83953435	chr1	153717980
chr1	112080872	chr12	84678858	chr1	153845453
chr1	112084520	chr12	85199185	chr1	153854694
chr1	112396020	chr12	85862522	chr1	153959148
chr1	112429327	chr12	86343139	chr1	153962889
chr1	112506376	chr12	87310938	chr1	154159429
chr1	112549707	chr12	88061207	chr1	154171661
chr1	112635548	chr12	89257557	chr1	154451052
chr1	112782011	chr12	89345722	chr1	154506722
chr1	112946265	chr12	89352049	chr1	154581850
chr1	112947013	chr12	89444819	chr1	154600327
chr1	113008686	chr12	89492108	chr1	154625208
chr1	113014843	chr12	89743710	chr1	154642112
chr1	113067849	chr12	90277677	chr1	154675835
chr1	113243234	chr12	90715284	chr1	154841403
chr1	113337297	chr12	90807626	chr1	154850920
chr1	113360453	chr12	92432813	chr1	154857925
chr1	113370144	chr12	93043847	chr1	154954873
chr1	113383617	chr12	94070903	chr1	154979410
chr1	113420254	chr12	94093000	chr1	155037267
chr1	113454209	chr12	94135476	chr1	155057187
chr1	113499937	chr12	94384866	chr1	155063946
chr1	113569728	chr12	94404158	chr1	155138698
chr1	113584406	chr12	94654981	chr1	155165965
chr1	113596599	chr12	94819908	chr1	155188605
chr1	113599587	chr12	94926625	chr1	155220495
chr1	113614788	chr12	95043484	chr1	155249494
chr1	113615102	chr12	95209742	chr1	155532448
chr1	113672847	chr12	95350671	chr1	155561638
chr1	113742111	chr12	95601257	chr1	155618405
chr1	113797555	chr12	95611071	chr1	155904044
chr1	113798340	chr12	96017452	chr1	156024203
chr1	113819132	chr12	96795680	chr1	156031186
chr1	113863728	chr12	97526197	chr1	156036062
chr1	114037205	chr12	97857952	chr1	156100066
chr1	114090277	chr12	98178843	chr1	156111064
chr1	114136636	chr12	98884758	chr1	156115690
chr1	114223448	chr12	99420472	chr1	156186162
chr1	114354533	chr12	100496326	chr1	156195239
chr1	114447676	chr12	101173065	chr1	156252594
chr1	114471853	chr12	102224736	chr1	156265420
chr1	114519535	chr12	103218290	chr1	156307982
chr1	114566758	chr12	103969161	chr1	156355552
chr1	114577394	chr12	104264230	chr1	156391945
chr1	114580292	chr12	104642231	chr1	156409392
chr1	114592764	chr12	105182652	chr1	156495929
chr1	114618181	chr12	105446897	chr1	156553912
chr1	114623139	chr12	105724587	chr1	156571361
chr1	114630520	chr12	106751395	chr1	156629705
chr1	114631195	chr12	106976335	chr1	156643369
chr1	114688243	chr12	107161989	chr1	156695636
chr1	114777117	chr12	107259412	chr1	156736754
chr1	114825357	chr12	107889773	chr1	156767017
chr1	115183239	chr12	108154691	chr1	156862070
chr1	115295909	chr12	108647562	chr1	156944725
chr1	115522015	chr12	108757093	chr1	157016844
chr1	115625381	chr12	108835921	chr1	157039630
chr1	115681516	chr12	108868882	chr1	157110081
chr1	115817905	chr12	109458568	chr1	157179466
chr1	115870612	chr12	109530999	chr1	157210877
chr1	116069724	chr12	109660449	chr1	157459107
chr1	116150690	chr12	109746967	chr1	157549957
chr1	116175375	chr12	109865910	chr1	157840349
chr1	116339531	chr12	110035623	chr1	157918245
chr1	116454628	chr12	110243173	chr1	157945071
chr1	116467211	chr12	110888094	chr1	157961820
chr1	116488660	chr12	110939792	chr1	157989405
chr1	116502992	chr12	111249165	chr1	158072934
chr1	116523948	chr12	111264546	chr1	158091432
chr1	116537114	chr12	111325721	chr1	158094859
chr1	116681767	chr12	111612318	chr1	158178600
chr1	116877857	chr12	111751565	chr1	158392075
chr1	116940264	chr12	112856385	chr1	158456520
chr1	117129542	chr12	113015780	chr1	158942764
chr1	117230311	chr12	113028179	chr1	158976332
chr1	117374892	chr12	113573499	chr1	159147082
chr1	117396559	chr12	114075629	chr1	159167808
chr1	117403613	chr12	114299531	chr1	159181069
chr1	117492342	chr12	114710016	chr1	159190697
chr1	117714689	chr12	114888407	chr1	159768726
chr1	117811168	chr12	115106671	chr1	159801398
chr1	117815327	chr12	115411553	chr1	159976070
chr1	117827257	chr12	115945797	chr1	160027860
chr1	117888930	chr12	116786792	chr1	160139259
chr1	118050282	chr12	116865102	chr1	160227103
chr1	118117093	chr12	117037546	chr1	160345453
chr1	118408932	chr12	117125757	chr1	160346165
chr1	118655709	chr12	117141133	chr1	160370086
chr1	118790259	chr12	118275131	chr1	160432684
chr1	118792893	chr12	118558272	chr1	160514581
chr1	119025760	chr12	119207684	chr1	160576862
chr1	119254132	chr12	119418668	chr1	160641758
chr1	119297395	chr12	119835502	chr1	160651175
chr1	119326048	chr12	119882339	chr1	160776180
chr1	119364350	chr12	120427389	chr1	160804637
chr1	119471481	chr12	120524503	chr1	160924149
chr1	119502711	chr12	120832342	chr1	160941665
chr1	119545502	chr12	120851703	chr1	160951406
chr1	119551373	chr12	121466409	chr1	160957515
chr1	119585260	chr12	121905051	chr1	161004381
chr1	119740391	chr12	122020569	chr1	161109674
chr1	119818176	chr12	122135077	chr1	161123584
chr1	119868901	chr12	122188286	chr1	161170501
chr1	119883312	chr12	122459493	chr1	161190449
chr1	120222049	chr12	122985467	chr1	161197157
chr1	120230319	chr12	123310621	chr1	161373075
chr1	120232251	chr12	123319661	chr1	161707340
chr1	120316394	chr12	123356663	chr1	161719911
chr1	121161801	chr12	123453707	chr1	161875198
chr1	121484067	chr12	123755615	chr1	161935799
chr1	144533785	chr12	123849395	chr1	161958955
chr1	144913721	chr12	123868279	chr1	162025856
chr1	144936325	chr12	124625428	chr1	162061693
chr1	144941055	chr12	124997691	chr1	162117594
chr1	145023018	chr12	125230684	chr1	162142516
chr1	145058799	chr12	125382957	chr1	162167956
chr1	145092231	chr12	125765084	chr1	162195960
chr1	145112789	chr12	126018088	chr1	162218523
chr1	145382803	chr12	127039261	chr1	162269836
chr1	145421625	chr12	127650654	chr1	162361715
chr1	145437878	chr12	128022479	chr1	162368558
chr1	145457245	chr12	130255909	chr1	162583377
chr1	145486995	chr12	130481741	chr1	162661043
chr1	145547823	chr12	130498394	chr1	162863196
chr1	145554912	chr12	130539367	chr1	162955691
chr1	145629727	chr12	130621807	chr1	163041636
chr1	146555916	chr12	130641887	chr1	163127090
chr1	146656700	chr12	130815785	chr1	163172878
chr1	146808006	chr12	130825091	chr1	163285470
chr1	146976596	chr12	130924111	chr1	163291351
chr1	147039731	chr12	131338047	chr1	163331028
chr1	147059221	chr12	131589277	chr1	163369547
chr1	147069474	chr12	132311827	chr1	163374609
chr1	147198201	chr12	132678658	chr1	163379712
chr1	147253220	chr12	132906206	chr1	163437177
chr1	147308743	chr12	133263383	chr1	163531349
chr1	147362398	chr12	133305889	chr1	163566723
chr1	147364792	chr12	133345125	chr1	163580946
chr1	147727198	chr12	133385996	chr1	163584073
chr1	147806488	chr12	133757851	chr1	163769157
chr1	149817065	chr13	20392438	chr1	163805717
chr1	149859421	chr13	20987096	chr1	164023485
chr1	150022452	chr13	21141114	chr1	164132500
chr1	150228536	chr13	21803368	chr1	164197066
chr1	150241340	chr13	22051021	chr1	164209473
chr1	150275117	chr13	22486028	chr1	164267139
chr1	150402375	chr13	23172592	chr1	164279936
chr1	150459567	chr13	23896802	chr1	164391918
chr1	150533491	chr13	24007181	chr1	164479687
chr1	150540700	chr13	24914542	chr1	164495774
chr1	150545688	chr13	25201336	chr1	164527377
chr1	150551500	chr13	25258124	chr1	164544477
chr1	150576946	chr13	26484971	chr1	164574250
chr1	150582139	chr13	26554529	chr1	164586955
chr1	150594023	chr13	27281884	chr1	164603699
chr1	150601586	chr13	27323509	chr1	164642980
chr1	150669602	chr13	28396899	chr1	164682646
chr1	150778980	chr13	28404196	chr1	164704586
chr1	150885191	chr13	28528059	chr1	164756631
chr1	150898517	chr13	28624394	chr1	164871660
chr1	151061521	chr13	28868724	chr1	164883398
chr1	151168760	chr13	29029947	chr1	164922509
chr1	151170671	chr13	30982509	chr1	165022502
chr1	151267399	chr13	31191818	chr1	165039637
chr1	151371886	chr13	31787670	chr1	165042380
chr1	151549769	chr13	31953439	chr1	165083611
chr1	151707512	chr13	32238042	chr1	165227285
chr1	151762876	chr13	32820611	chr1	165256573
chr1	151833205	chr13	32965469	chr1	165320113
chr1	151882381	chr13	33833580	chr1	165377830
chr1	151909252	chr13	35390282	chr1	165413298
chr1	151945458	chr13	35474449	chr1	165495105
chr1	152016156	chr13	36147864	chr1	165530286
chr1	152040554	chr13	37369768	chr1	165562269
chr1	153095427	chr13	37890558	chr1	165585331
chr1	153107630	chr13	38509119	chr1	165604061
chr1	153438775	chr13	39198974	chr1	165687162
chr1	153571298	chr13	39903250	chr1	165893980
chr1	153643374	chr13	39959681	chr1	165897383
chr1	153717882	chr13	40139744	chr1	166000019
chr1	153854682	chr13	41254629	chr1	166035487
chr1	154159617	chr13	41345227	chr1	166059680
chr1	154244784	chr13	41548931	chr1	166162252
chr1	154583513	chr13	42744165	chr1	166242052
chr1	154642200	chr13	43167227	chr1	166272377
chr1	154950102	chr13	43450627	chr1	166323669
chr1	154954920	chr13	43877218	chr1	166352409
chr1	154979415	chr13	44379751	chr1	166448065
chr1	154989996	chr13	44652895	chr1	166497016
chr1	155108142	chr13	45451031	chr1	166829221
chr1	155188683	chr13	45492150	chr1	166879641
chr1	155196786	chr13	45621555	chr1	167127303
chr1	155214919	chr13	46038747	chr1	167132481
chr1	155220409	chr13	46343115	chr1	167175488
chr1	155278276	chr13	48391004	chr1	167237414
chr1	155349581	chr13	48611446	chr1	167297965
chr1	155826979	chr13	48809966	chr1	167342492
chr1	155904029	chr13	50226681	chr1	167399645
chr1	155908034	chr13	50422080	chr1	167426827
chr1	155959224	chr13	50510252	chr1	167509657
chr1	156030919	chr13	51375492	chr1	167676089
chr1	156053583	chr13	51796030	chr1	167684536
chr1	156163589	chr13	51817971	chr1	167739217
chr1	156186159	chr13	51877228	chr1	167772462
chr1	156195242	chr13	52077402	chr1	167831349
chr1	156252598	chr13	52097668	chr1	167844372
chr1	156391986	chr13	52157916	chr1	167874338
chr1	156409534	chr13	53024763	chr1	168051498
chr1	156473070	chr13	53311564	chr1	168115157
chr1	156553773	chr13	53454204	chr1	168204572
chr1	156606377	chr13	53542208	chr1	168303286
chr1	156621786	chr13	53917570	chr1	168356878
chr1	156643433	chr13	54768536	chr1	168397427
chr1	156662766	chr13	54930997	chr1	168409067
chr1	156678050	chr13	54983006	chr1	168540003
chr1	156710739	chr13	55520117	chr1	168572732
chr1	156717077	chr13	56741169	chr1	168606548
chr1	156736697	chr13	59805603	chr1	168888321
chr1	156767103	chr13	59983877	chr1	169042990
chr1	156944624	chr13	60022433	chr1	169053637
chr1	157016835	chr13	60053884	chr1	169103535
chr1	157039501	chr13	60909626	chr1	169114096
chr1	157051424	chr13	61157746	chr1	169257138
chr1	157059983	chr13	63085501	chr1	169278535
chr1	157109882	chr13	65108564	chr1	169317548
chr1	157179469	chr13	65583356	chr1	169448585
chr1	157210870	chr13	66190261	chr1	169498579
chr1	157296323	chr13	66798647	chr1	169515740
chr1	157536321	chr13	67832843	chr1	169615684
chr1	157549965	chr13	67990522	chr1	169665931
chr1	157610346	chr13	69287575	chr1	169714393
chr1	157641329	chr13	70197119	chr1	170065449
chr1	157661072	chr13	71344277	chr1	170115101
chr1	157840200	chr13	72303687	chr1	170178130
chr1	157918433	chr13	74163613	chr1	170456458
chr1	157989425	chr13	74282565	chr1	170472754
chr1	158072893	chr13	74296344	chr1	170501826
chr1	158091436	chr13	77477794	chr1	170584204
chr1	158155477	chr13	78248897	chr1	170632230
chr1	158178582	chr13	78427855	chr1	170789055
chr1	158391942	chr13	78711929	chr1	171157736
chr1	158456562	chr13	79232357	chr1	171179651
chr1	158898248	chr13	80540426	chr1	171182678
chr1	158976236	chr13	81158891	chr1	171189259
chr1	159059077	chr13	81553201	chr1	171195938
chr1	159147086	chr13	82561789	chr1	171267652
chr1	159188982	chr13	83249300	chr1	171280035
chr1	159190930	chr13	83474545	chr1	171282913
chr1	159801388	chr13	83732682	chr1	171341440
chr1	159976221	chr13	84467989	chr1	171389943
chr1	160079119	chr13	84804687	chr1	171400998
chr1	160139060	chr13	85096836	chr1	171449049
chr1	160221862	chr13	85370820	chr1	171457337
chr1	160227054	chr13	87533736	chr1	171556566
chr1	160369379	chr13	87534357	chr1	171614082
chr1	160432717	chr13	87786498	chr1	171770606
chr1	160589725	chr13	88997607	chr1	171878604
chr1	160641689	chr13	89113640	chr1	171935928
chr1	160651282	chr13	89416184	chr1	172059258
chr1	160804864	chr13	89766082	chr1	172104515
chr1	160924089	chr13	90577329	chr1	172247649
chr1	160931043	chr13	90874673	chr1	172329284
chr1	160957475	chr13	92166176	chr1	172360055
chr1	160988158	chr13	93732885	chr1	172398432
chr1	161004591	chr13	93886318	chr1	172500398
chr1	161195447	chr13	94177335	chr1	172507061
chr1	161398307	chr13	94792292	chr1	172552879
chr1	161707343	chr13	94796270	chr1	172673616
chr1	161719952	chr13	94964700	chr1	172697266
chr1	161735866	chr13	95014757	chr1	172711683
chr1	161875001	chr13	95130393	chr1	172795280
chr1	161886908	chr13	95413650	chr1	172820234
chr1	161935056	chr13	95677436	chr1	172960132
chr1	161983811	chr13	95806313	chr1	173171501
chr1	162025870	chr13	95828400	chr1	173224215
chr1	162061600	chr13	95843966	chr1	173369384
chr1	162114441	chr13	95953904	chr1	173389490
chr1	162117364	chr13	96056619	chr1	173399443
chr1	162167961	chr13	96947370	chr1	173414197
chr1	162174918	chr13	97550310	chr1	173500109
chr1	162196036	chr13	97879384	chr1	173514845
chr1	162218519	chr13	99340535	chr1	173857786
chr1	162233972	chr13	99828907	chr1	173930397
chr1	162441225	chr13	100031337	chr1	174044006
chr1	162863085	chr13	100311508	chr1	174083911
chr1	163056100	chr13	100342977	chr1	174186829
chr1	163136516	chr13	100370640	chr1	174220401
chr1	163173047	chr13	100450090	chr1	174231832
chr1	163330994	chr13	100544310	chr1	174419011
chr1	163369767	chr13	100710655	chr1	174538335
chr1	163374421	chr13	100800653	chr1	174712975
chr1	163379776	chr13	100927003	chr1	174739038
chr1	163396647	chr13	102106733	chr1	174840685
chr1	163397189	chr13	102167211	chr1	174992474
chr1	163437182	chr13	102962973	chr1	174998836
chr1	163473538	chr13	103109686	chr1	175005816
chr1	163531287	chr13	103446012	chr1	175094399
chr1	163566580	chr13	103497940	chr1	175099114
chr1	163580755	chr13	104833586	chr1	175123972
chr1	163584343	chr13	106954478	chr1	175199039
chr1	163716403	chr13	107333480	chr1	175286495
chr1	163805802	chr13	107448809	chr1	175345443
chr1	163844564	chr13	108226994	chr1	175546083
chr1	163853137	chr13	108867498	chr1	175549428
chr1	164023566	chr13	110076519	chr1	175694886
chr1	164132580	chr13	110679767	chr1	175754004
chr1	164267372	chr13	111024981	chr1	175766842
chr1	164279655	chr13	111108362	chr1	175777660
chr1	164342847	chr13	111449942	chr1	175793450
chr1	164383973	chr13	112170243	chr1	175834268
chr1	164391928	chr13	112258905	chr1	175887536
chr1	164479653	chr13	112286881	chr1	175929788
chr1	164495623	chr13	113390143	chr1	176042801
chr1	164527395	chr13	113560533	chr1	176088602
chr1	164544684	chr13	113597055	chr1	176176264
chr1	164574450	chr13	113704915	chr1	176196720
chr1	164581002	chr13	113808246	chr1	176211000
chr1	164586593	chr13	113898746	chr1	176514303
chr1	164704660	chr13	113980613	chr1	176608185
chr1	164741020	chr13	114018395	chr1	176660688
chr1	164756676	chr13	114854570	chr1	176812944
chr1	164793841	chr13	114920950	chr1	177139775
chr1	164871671	chr13	115022393	chr1	177322739
chr1	164921062	chr14	20929348	chr1	177383269
chr1	164951872	chr14	21131308	chr1	177675285
chr1	165017341	chr14	21482995	chr1	177763727
chr1	165022517	chr14	21777027	chr1	177968701
chr1	165039628	chr14	21924187	chr1	178000908
chr1	165083498	chr14	22694303	chr1	178030008
chr1	165185498	chr14	22782747	chr1	178091165
chr1	165197506	chr14	23322249	chr1	178148689
chr1	165249256	chr14	23564653	chr1	178252522
chr1	165314206	chr14	24050012	chr1	178263846
chr1	165320082	chr14	24527588	chr1	178279714
chr1	165413408	chr14	24559405	chr1	178545026
chr1	165530313	chr14	24559883	chr1	178898011
chr1	165562287	chr14	24685189	chr1	178971856
chr1	165571005	chr14	27260530	chr1	179163099
chr1	165585304	chr14	27606430	chr1	179221037
chr1	165687207	chr14	30954360	chr1	179250107
chr1	165826152	chr14	31592145	chr1	179265460
chr1	165893878	chr14	32953384	chr1	179287703
chr1	165902895	chr14	33045230	chr1	179338866
chr1	165912574	chr14	34525481	chr1	179498459
chr1	166142388	chr14	34697251	chr1	179523500
chr1	166272247	chr14	36738650	chr1	179554763
chr1	166276225	chr14	37295264	chr1	179615269
chr1	166305591	chr14	39081217	chr1	179670775
chr1	166352104	chr14	40349539	chr1	179744621
chr1	166449074	chr14	45267967	chr1	179757486
chr1	166497134	chr14	45315500	chr1	179890412
chr1	166710074	chr14	48134991	chr1	180150263
chr1	166730240	chr14	49640580	chr1	180206821
chr1	166829274	chr14	50571810	chr1	180208170
chr1	166830758	chr14	51133229	chr1	180237727
chr1	166879716	chr14	51344658	chr1	180323115
chr1	166919426	chr14	51620546	chr1	180385048
chr1	166921645	chr14	52598420	chr1	180451531
chr1	167091171	chr14	52718575	chr1	180484948
chr1	167107459	chr14	53300550	chr1	180609009
chr1	167117626	chr14	53521585	chr1	180716276
chr1	167127305	chr14	54208882	chr1	180832209
chr1	167132100	chr14	54449251	chr1	180851164
chr1	167167772	chr14	54828881	chr1	181012027
chr1	167175507	chr14	55144004	chr1	181034862
chr1	167237472	chr14	55150999	chr1	181053551
chr1	167297963	chr14	55272629	chr1	181111498
chr1	167342427	chr14	56108798	chr1	181135707
chr1	167399719	chr14	56219317	chr1	181149268
chr1	167426868	chr14	56424580	chr1	181185894
chr1	167458848	chr14	56933210	chr1	181470431
chr1	167472242	chr14	57200192	chr1	181532344
chr1	167509687	chr14	57361321	chr1	181578061
chr1	167657091	chr14	57496281	chr1	181645443
chr1	167674528	chr14	57649452	chr1	181708762
chr1	167739440	chr14	59235675	chr1	181880131
chr1	167740406	chr14	59824880	chr1	181939074
chr1	167766197	chr14	60286079	chr1	181984459
chr1	167772609	chr14	61111634	chr1	182023809
chr1	167826229	chr14	61568544	chr1	182070365
chr1	167831315	chr14	61721975	chr1	182106249
chr1	167844418	chr14	61965799	chr1	182270948
chr1	167874346	chr14	63079023	chr1	182284042
chr1	168080425	chr14	64556691	chr1	182332178
chr1	168228882	chr14	64761571	chr1	182365765
chr1	168260565	chr14	65007048	chr1	182415102
chr1	168303453	chr14	65174816	chr1	182563097
chr1	168357035	chr14	65936735	chr1	182564859
chr1	168408924	chr14	67999843	chr1	182571266
chr1	168494434	chr14	68038112	chr1	182631724
chr1	168540009	chr14	68066845	chr1	182927058
chr1	168770702	chr14	68400707	chr1	182988871
chr1	168797716	chr14	68727934	chr1	183004720
chr1	168888285	chr14	70002048	chr1	183066474
chr1	169042994	chr14	70193723	chr1	183204062
chr1	169082980	chr14	70233606	chr1	183248352
chr1	169210131	chr14	70454614	chr1	183275495
chr1	169240266	chr14	70883662	chr1	183289758
chr1	169257136	chr14	72113743	chr1	183372334
chr1	169317643	chr14	72243700	chr1	183512654
chr1	169337013	chr14	72322220	chr1	183515721
chr1	169448697	chr14	72710055	chr1	183624767
chr1	169498396	chr14	73271070	chr1	183885018
chr1	169515577	chr14	73371774	chr1	183914424
chr1	169526956	chr14	73540523	chr1	183964020
chr1	169570401	chr14	73646403	chr1	183971455
chr1	169651309	chr14	73875769	chr1	183994144
chr1	169659589	chr14	74769504	chr1	184025622
chr1	169763915	chr14	74793063	chr1	184031818
chr1	169865043	chr14	74896005	chr1	184126240
chr1	170114866	chr14	75348246	chr1	184128477
chr1	170178294	chr14	75555264	chr1	184241577
chr1	170406732	chr14	75770306	chr1	184353005
chr1	170456720	chr14	75985014	chr1	184466983
chr1	170472824	chr14	76027389	chr1	184543471
chr1	170532186	chr14	76819089	chr1	184660626
chr1	170549887	chr14	77251180	chr1	184665689
chr1	170632246	chr14	77333207	chr1	184729204
chr1	170648199	chr14	77342436	chr1	184869504
chr1	170862992	chr14	77525926	chr1	184915251
chr1	171081232	chr14	77687753	chr1	185055978
chr1	171157927	chr14	77891264	chr1	185194769
chr1	171182625	chr14	77949266	chr1	185218791
chr1	171189264	chr14	78630555	chr1	185219361
chr1	171192193	chr14	78799955	chr1	185500949
chr1	171195843	chr14	79477608	chr1	185514270
chr1	171236074	chr14	79840668	chr1	185565352
chr1	171267803	chr14	80035030	chr1	185615232
chr1	171275572	chr14	83417505	chr1	185650204
chr1	171280036	chr14	83695843	chr1	185669096
chr1	171282919	chr14	84182450	chr1	185812456
chr1	171389969	chr14	84360820	chr1	185881668
chr1	171401000	chr14	84427169	chr1	185886782
chr1	171449250	chr14	85010874	chr1	185927578
chr1	171610586	chr14	85977502	chr1	186181821
chr1	171750281	chr14	86012772	chr1	186469764
chr1	171770614	chr14	87293285	chr1	186631829
chr1	171786882	chr14	87616357	chr1	186851836
chr1	171878615	chr14	87653130	chr1	186955006
chr1	171908749	chr14	88237522	chr1	186977533
chr1	171936001	chr14	88831155	chr1	187016182
chr1	172061849	chr14	88958551	chr1	187348402
chr1	172154225	chr14	89084773	chr1	187572945
chr1	172247619	chr14	89317818	chr1	187593944
chr1	172329586	chr14	89606192	chr1	188058377
chr1	172398529	chr14	89759834	chr1	188290035
chr1	172552903	chr14	89762396	chr1	188551989
chr1	172795417	chr14	89907483	chr1	188638918
chr1	172960142	chr14	90809815	chr1	188667235
chr1	173171582	chr14	91282437	chr1	188718519
chr1	173224445	chr14	91838799	chr1	188733214
chr1	173244659	chr14	92036410	chr1	188751427
chr1	173248109	chr14	92044502	chr1	188873337
chr1	173369510	chr14	92297172	chr1	188910943
chr1	173399711	chr14	92302809	chr1	188962278
chr1	173487792	chr14	93626606	chr1	189154026
chr1	173822106	chr14	94454622	chr1	189284311
chr1	173857798	chr14	94468082	chr1	189398582
chr1	173869054	chr14	94660223	chr1	189476377
chr1	173903683	chr14	95247435	chr1	189647885
chr1	174084023	chr14	95465055	chr1	189785735
chr1	174175351	chr14	95786151	chr1	189789778
chr1	174186832	chr14	96086418	chr1	189868739
chr1	174538437	chr14	96166862	chr1	190020581
chr1	174662347	chr14	96414931	chr1	190342851
chr1	174739240	chr14	96445832	chr1	190448027
chr1	174840762	chr14	97053943	chr1	190508240
chr1	174844266	chr14	97733113	chr1	190520690
chr1	174929880	chr14	97853491	chr1	190827202
chr1	174967748	chr14	98920289	chr1	190905065
chr1	174992519	chr14	99117296	chr1	191081246
chr1	174998810	chr14	99567153	chr1	191096070
chr1	175005619	chr14	99712420	chr1	191357369
chr1	175042770	chr14	99887144	chr1	191740098
chr1	175098967	chr14	100210765	chr1	191876334
chr1	175199043	chr14	100219311	chr1	191962803
chr1	175307448	chr14	100633618	chr1	192095371
chr1	175357439	chr14	101194883	chr1	192343489
chr1	175369425	chr14	101348142	chr1	192415049
chr1	175390231	chr14	101544409	chr1	192443215
chr1	175532784	chr14	101962530	chr1	192446718
chr1	175545909	chr14	102054890	chr1	192563869
chr1	175549422	chr14	102227630	chr1	192660353
chr1	175566050	chr14	102384609	chr1	192774922
chr1	175754001	chr14	102605995	chr1	192779437
chr1	175766780	chr14	103414406	chr1	192899591
chr1	175777658	chr14	103549845	chr1	192946036
chr1	175817567	chr14	103737709	chr1	192988531
chr1	175834207	chr14	103759246	chr1	192991019
chr1	175887393	chr14	103984972	chr1	193154285
chr1	175891402	chr14	104387775	chr1	193375916
chr1	175905286	chr14	104651753	chr1	193431988
chr1	175937617	chr14	104758383	chr1	193533660
chr1	176088832	chr14	105116573	chr1	193562168
chr1	176126364	chr14	105282191	chr1	193649400
chr1	176194294	chr14	105344173	chr1	193670694
chr1	176210547	chr14	105818629	chr1	193710177
chr1	176403426	chr14	105947130	chr1	194143497
chr1	176514299	chr14	107150772	chr1	194227093
chr1	176608223	chr15	23045638	chr1	194264777
chr1	176631266	chr15	23086188	chr1	194412325
chr1	176664022	chr15	25068822	chr1	194485163
chr1	176689542	chr15	25101605	chr1	194555536
chr1	176781227	chr15	26184170	chr1	194976831
chr1	176812970	chr15	26480505	chr1	195260382
chr1	176928255	chr15	26505745	chr1	195577999
chr1	176965730	chr15	26936456	chr1	195683861
chr1	177013484	chr15	27018095	chr1	195793672
chr1	177017938	chr15	27420848	chr1	195855048
chr1	177034662	chr15	27997836	chr1	196003261
chr1	177041534	chr15	28022040	chr1	196057498
chr1	177199365	chr15	29903247	chr1	196075086
chr1	177322625	chr15	30260680	chr1	196117405
chr1	177383272	chr15	31189217	chr1	196272053
chr1	177763633	chr15	31371833	chr1	196280824
chr1	177890632	chr15	31598674	chr1	196287009
chr1	177953390	chr15	32015515	chr1	196313483
chr1	178001051	chr15	32269981	chr1	196324416
chr1	178029771	chr15	32295722	chr1	196342899
chr1	178090920	chr15	33191480	chr1	196630134
chr1	178235808	chr15	33472219	chr1	197259297
chr1	178252517	chr15	33961929	chr1	197408635
chr1	178310233	chr15	34127170	chr1	197490254
chr1	178314017	chr15	34506412	chr1	197510655
chr1	178511634	chr15	34517101	chr1	197564322
chr1	178544974	chr15	35312671	chr1	197779888
chr1	178575014	chr15	36771527	chr1	197783445
chr1	178743552	chr15	36837076	chr1	197860103
chr1	178971821	chr15	37000321	chr1	198065344
chr1	179068419	chr15	37045198	chr1	198201397
chr1	179088653	chr15	39823093	chr1	198286669
chr1	179110841	chr15	40101123	chr1	198328130
chr1	179163101	chr15	40179387	chr1	198434664
chr1	179250141	chr15	40342719	chr1	198655260
chr1	179265440	chr15	40886036	chr1	198697321
chr1	179300295	chr15	41047275	chr1	198758640
chr1	179338764	chr15	41090851	chr1	198962791
chr1	179498607	chr15	41218190	chr1	199130295
chr1	179523594	chr15	41694531	chr1	199280508
chr1	179890710	chr15	41718874	chr1	199372771
chr1	180148032	chr15	41779995	chr1	199432656
chr1	180208326	chr15	41851348	chr1	199460005
chr1	180237728	chr15	41943917	chr1	199600843
chr1	180322911	chr15	42066657	chr1	199647664
chr1	180334286	chr15	42174280	chr1	199660641
chr1	180343504	chr15	42376511	chr1	199799443
chr1	180385050	chr15	42426193	chr1	199835641
chr1	180394058	chr15	42676938	chr1	200017009
chr1	180455326	chr15	42912026	chr1	200050660
chr1	180491443	chr15	43182653	chr1	200195315
chr1	180644728	chr15	43585820	chr1	200271419
chr1	180716349	chr15	44196038	chr1	200276581
chr1	180805997	chr15	44930625	chr1	200333202
chr1	180851127	chr15	45102469	chr1	200343026
chr1	180892289	chr15	45492557	chr1	200365596
chr1	180950670	chr15	46162510	chr1	200380534
chr1	181012159	chr15	48035027	chr1	200422876
chr1	181053415	chr15	48070597	chr1	200457662
chr1	181071141	chr15	49338597	chr1	200527759
chr1	181135578	chr15	49447695	chr1	200530949
chr1	181149492	chr15	49912977	chr1	200634975
chr1	181185694	chr15	50168940	chr1	200787264
chr1	181220799	chr15	50716547	chr1	200901008
chr1	181532146	chr15	51973489	chr1	201012044
chr1	181552652	chr15	52068293	chr1	201077932
chr1	181560166	chr15	52519694	chr1	201144103
chr1	181577970	chr15	52684559	chr1	201264113
chr1	181631661	chr15	53037550	chr1	201368356
chr1	181752433	chr15	53879066	chr1	201472566
chr1	181939060	chr15	53917612	chr1	201528737
chr1	181984582	chr15	54755385	chr1	201574207
chr1	182053570	chr15	55460586	chr1	201655845
chr1	182070400	chr15	55581950	chr1	201729550
chr1	182112230	chr15	56285762	chr1	201847109
chr1	182199185	chr15	57210673	chr1	201941835
chr1	182271049	chr15	57543417	chr1	201978523
chr1	182365853	chr15	59063076	chr1	202032401
chr1	182415198	chr15	59222149	chr1	202070853
chr1	182417870	chr15	59453525	chr1	202182601
chr1	182419305	chr15	59646038	chr1	202206321
chr1	182571284	chr15	60197453	chr1	202249736
chr1	182585351	chr15	60317153	chr1	202291352
chr1	182599768	chr15	61296130	chr1	202299201
[truncated: 33,193 more rows]
