# Supplementary material for: RFECS: A Random-Forest Based Algorithm for Enhancer Identification from Chromatin State
Source: PLoS Comput Biol. 2013 Mar 14;9(3):e1002968. doi: 10.1371/journal.pcbi.1002968 (PMC3597546; doi:10.1371/journal.pcbi.1002968)
Supplement: Table S5 — All p300 binding-sites called using MACS in IMR90 cells (hg19). (XLS) [file pcbi.1002968.s012.xls]

## Sheet: p300_all
Table S5.All p300 binding-sites called using MACS in IMR90 cells(hg19)
Chromosome	Location
chr1	565801
chr1	752763
chr1	753647
chr1	856587
chr1	873944
chr1	875880
chr1	878729
chr1	879912
chr1	936283
chr1	948695
chr1	956643
chr1	999718
chr1	1014996
chr1	1092974
chr1	1136980
chr1	1143752
chr1	1167399
chr1	1199626
chr1	1200410
chr1	1209254
chr1	1240197
chr1	1287182
chr1	1296119
chr1	1297519
chr1	1310674
chr1	1334976
chr1	1342695
chr1	1365981
chr1	1551140
chr1	1567401
chr1	1711871
chr1	1790886
chr1	1821444
chr1	1822489
chr1	2019988
chr1	2071591
chr1	2121187
chr1	2126883
chr1	2130744
chr1	2139875
chr1	2160702
chr1	2163266
chr1	2166124
chr1	2178014
chr1	2210928
chr1	2222324
chr1	2243232
chr1	2245958
chr1	2345996
chr1	2383386
chr1	2454810
chr1	2466571
chr1	2985758
chr1	3223836
chr1	3229807
chr1	3390290
chr1	3412862
chr1	3420928
chr1	3460105
chr1	3462503
chr1	3464951
chr1	3470198
chr1	3530127
chr1	3663897
chr1	3713119
chr1	3812329
chr1	3817064
chr1	4551246
chr1	5998611
chr1	6043628
chr1	6067597
chr1	6259734
chr1	6333578
chr1	6336660
chr1	6419832
chr1	6454045
chr1	6464916
chr1	6614629
chr1	6661372
chr1	6664358
chr1	6672983
chr1	6685844
chr1	6746587
chr1	6761867
chr1	6784821
chr1	6844631
chr1	6920276
chr1	6941284
chr1	7178120
chr1	7278573
chr1	7283801
chr1	7290046
chr1	7325040
chr1	7325926
chr1	7327765
chr1	7339653
chr1	7342026
chr1	7351936
chr1	7359523
chr1	7361195
chr1	7393742
chr1	7395495
chr1	7439612
chr1	7462113
chr1	7531182
chr1	7539135
chr1	7601983
chr1	7727798
chr1	7870639
chr1	7954093
chr1	7962975
chr1	8001682
chr1	8002478
chr1	8021460
chr1	8035521
chr1	8042524
chr1	8054271
chr1	8065336
chr1	8077822
chr1	8080291
chr1	8087605
chr1	8100864
chr1	8107818
chr1	8121539
chr1	8137489
chr1	8138443
chr1	8143272
chr1	8149952
chr1	8155230
chr1	8157686
chr1	8177206
chr1	8181596
chr1	8193521
chr1	8193962
chr1	8197952
chr1	8214898
chr1	8229990
chr1	8257968
chr1	8262379
chr1	8272186
chr1	8276225
chr1	8278898
chr1	8285135
chr1	8290601
chr1	8298287
chr1	8319845
chr1	8363437
chr1	8374551
chr1	8402573
chr1	8403685
chr1	8412425
chr1	8434146
chr1	8438381
chr1	8455248
chr1	8457192
chr1	8462536
chr1	8467207
chr1	8468347
chr1	8472370
chr1	8483618
chr1	8484411
chr1	8501551
chr1	8516751
chr1	8523568
chr1	8541981
chr1	8570454
chr1	8586160
chr1	8602211
chr1	8615442
chr1	8658271
chr1	8686722
chr1	8689492
chr1	8721590
chr1	8726565
chr1	8728475
chr1	8731563
chr1	8747321
chr1	8761413
chr1	8763667
chr1	8772984
chr1	8779309
chr1	8800461
chr1	8877666
chr1	8883063
chr1	8918317
chr1	8933818
chr1	8938155
chr1	8940259
chr1	8950169
chr1	8964156
chr1	9046430
chr1	9048248
chr1	9089681
chr1	9127491
chr1	9161017
chr1	9203587
chr1	9224169
chr1	9240424
chr1	9242224
chr1	9246816
chr1	9253591
chr1	9256454
chr1	9261702
chr1	9267341
chr1	9271659
chr1	9293568
chr1	9294630
chr1	9335723
chr1	9340608
chr1	9350399
chr1	9354743
chr1	9360412
chr1	9363408
chr1	9375816
chr1	9381284
chr1	9386902
chr1	9431711
chr1	9436984
chr1	9460880
chr1	9462086
chr1	9473299
chr1	9498912
chr1	9504225
chr1	9508985
chr1	9533297
chr1	9551324
chr1	9712545
chr1	9719544
chr1	9731757
chr1	9747499
chr1	9750165
chr1	9760599
chr1	9779354
chr1	9785283
chr1	9819751
chr1	9826046
chr1	9827008
chr1	9885829
chr1	9927758
chr1	9950609
chr1	9953449
chr1	9970810
chr1	10003466
chr1	10093148
chr1	10106220
chr1	10125211
chr1	10134652
chr1	10168439
chr1	10183121
chr1	10269989
chr1	10271641
chr1	10314020
chr1	10448034
chr1	10459207
chr1	10462986
chr1	10475648
chr1	10488256
chr1	10511444
chr1	10532665
chr1	10535017
chr1	10568779
chr1	10570796
chr1	10588564
chr1	10590537
chr1	10651371
chr1	10659464
chr1	10856773
chr1	11097852
chr1	11218845
chr1	11236666
chr1	11322867
chr1	11327924
chr1	11333344
chr1	11342288
chr1	11702684
chr1	11741515
chr1	11791991
chr1	11797053
chr1	11847790
chr1	11851084
chr1	11863834
chr1	11865972
chr1	11968596
chr1	11969733
chr1	11990063
chr1	11991301
chr1	12079624
chr1	12144040
chr1	12181868
chr1	12185043
chr1	12193192
chr1	12203847
chr1	12213733
chr1	12222065
chr1	12238360
chr1	12244441
chr1	12246227
chr1	12465837
chr1	12467627
chr1	12484511
chr1	12494468
chr1	12507520
chr1	12509481
chr1	12514815
chr1	12515260
chr1	12517259
chr1	12517836
chr1	12521518
chr1	12524807
chr1	12534304
chr1	12538469
chr1	12540985
chr1	12545748
chr1	12551923
chr1	12570574
chr1	12588518
chr1	12600397
chr1	12601799
chr1	12610103
chr1	12616659
chr1	12617539
chr1	12634052
chr1	12653788
chr1	12655264
chr1	12656678
chr1	12662122
chr1	12664564
chr1	12676232
chr1	12696772
chr1	12710389
chr1	14075393
chr1	14091181
chr1	14093789
chr1	14740508
chr1	15058490
chr1	15068991
chr1	15152884
chr1	15162315
chr1	15169046
chr1	15252907
chr1	15256183
chr1	15269564
chr1	15272158
chr1	15273557
chr1	15295197
chr1	15298516
chr1	15322976
chr1	15335454
chr1	15354791
chr1	15360039
chr1	15373184
chr1	15479000
chr1	15480761
chr1	15482485
chr1	15485903
chr1	15487275
chr1	15494087
chr1	15495181
chr1	15505583
chr1	15513585
chr1	15527307
chr1	15539839
chr1	15541204
chr1	15572318
chr1	15617130
chr1	15650199
chr1	15664334
chr1	15668664
chr1	15679084
chr1	15683596
chr1	15733878
chr1	15742599
chr1	15744194
chr1	15756446
chr1	15757814
chr1	15759601
chr1	15761485
chr1	15851222
chr1	15853176
chr1	15930269
chr1	15943998
chr1	15946850
chr1	16007321
chr1	16041152
chr1	16087550
chr1	16118714
chr1	16125705
chr1	16126795
chr1	16147128
chr1	16161513
chr1	16162266
chr1	16176101
chr1	16212374
chr1	16219856
chr1	16246023
chr1	16251386
chr1	16266062
chr1	16276402
chr1	16279444
chr1	16292648
chr1	16302577
chr1	16339410
chr1	16339921
chr1	16400430
chr1	16402718
chr1	16405541
chr1	16409021
chr1	16415727
chr1	16428345
chr1	16438402
chr1	16449631
chr1	16466197
chr1	16470564
chr1	16472981
chr1	16479119
chr1	16482569
chr1	16490868
chr1	16500209
chr1	16502611
chr1	16508570
chr1	16514386
chr1	16533267
chr1	16575497
chr1	16576561
chr1	16581241
chr1	16587487
chr1	16593196
chr1	16679089
chr1	16693586
chr1	16699300
chr1	16702220
chr1	16713127
chr1	16767143
chr1	16840791
chr1	16947635
chr1	17222731
chr1	17231615
chr1	17293948
chr1	17305343
chr1	17330570
chr1	17452426
chr1	17455141
chr1	17495266
chr1	17497504
chr1	17516620
chr1	17534700
chr1	17539388
chr1	17560433
chr1	17563708
chr1	17577320
chr1	17591863
chr1	17614125
chr1	17750341
chr1	17765074
chr1	17766131
chr1	17770146
chr1	17828979
chr1	17865111
chr1	17866626
chr1	17877609
chr1	17880717
chr1	17896309
chr1	17912869
chr1	17945477
chr1	17960230
chr1	17988254
chr1	18023079
chr1	18092164
chr1	18095210
chr1	18188545
chr1	18193166
chr1	18200895
chr1	18205545
chr1	18236356
chr1	18924111
chr1	19239745
chr1	19248968
chr1	19253320
chr1	19254416
chr1	19256421
chr1	19263159
chr1	19268084
chr1	19276335
chr1	19283426
chr1	19292523
chr1	19337752
chr1	19490124
chr1	19536828
chr1	19547685
chr1	19559191
chr1	19578000
chr1	19712471
chr1	19725019
chr1	19727923
chr1	19732767
chr1	19745179
chr1	19753920
chr1	19759668
chr1	19767135
chr1	19775572
chr1	19777536
chr1	19779068
chr1	19803457
chr1	19812025
chr1	19831602
chr1	19841189
chr1	19923549
chr1	19966667
chr1	19978941
chr1	19980370
chr1	20084985
chr1	20092274
chr1	20126847
chr1	20208776
chr1	20479024
chr1	20521853
chr1	20649839
chr1	20652750
chr1	20685316
chr1	20703587
chr1	20707194
chr1	20717285
chr1	20737877
chr1	20753592
chr1	20773459
chr1	20804330
chr1	20809096
chr1	20813283
chr1	20821695
chr1	20822834
chr1	20834671
chr1	20916325
chr1	20928122
chr1	20929431
chr1	20930870
chr1	20940528
chr1	20959850
chr1	21023527
chr1	21025217
chr1	21059777
chr1	21114043
chr1	21118926
chr1	21133696
chr1	21173247
chr1	21193690
chr1	21198223
chr1	21348946
chr1	21396269
chr1	21448555
chr1	21476535
chr1	21503294
chr1	21538793
chr1	21565101
chr1	21588483
chr1	21591655
chr1	21629314
chr1	21639818
chr1	21643994
chr1	21646298
chr1	21647765
chr1	21649763
chr1	21651370
chr1	21660926
chr1	21665339
chr1	21669080
chr1	21672456
chr1	21697238
chr1	21838684
chr1	21864740
chr1	21868491
chr1	21880321
chr1	21894236
chr1	21900710
chr1	21913587
chr1	21965295
chr1	21985769
chr1	22000157
chr1	22091359
chr1	22102959
chr1	22109827
chr1	22143592
chr1	22188789
chr1	22196490
chr1	22246135
chr1	22247229
chr1	22253411
chr1	22257811
chr1	22262165
chr1	22266319
chr1	22290585
chr1	22345719
chr1	22351981
chr1	22379189
chr1	22577480
chr1	22584014
chr1	22586250
chr1	22668753
chr1	22735692
chr1	22740888
chr1	22743261
chr1	22747136
chr1	22774283
chr1	22778442
chr1	22827181
chr1	23016121
chr1	23039336
chr1	23055482
chr1	23066383
chr1	23072756
chr1	23074078
chr1	23077033
chr1	23080355
chr1	23135007
chr1	23158749
chr1	23188428
chr1	23295906
chr1	23303086
chr1	23345844
chr1	23426914
chr1	23428248
chr1	23428902
chr1	23449058
chr1	23494484
chr1	23504634
chr1	23515563
chr1	23521033
chr1	23523615
chr1	23525050
chr1	23551712
chr1	23600128
chr1	23609588
chr1	23670799
chr1	23688680
chr1	23695581
chr1	23703766
chr1	23721313
chr1	23729617
chr1	23730565
chr1	23748944
chr1	23770846
chr1	23797532
chr1	23823765
chr1	23866438
chr1	23871367
chr1	23881399
chr1	23885965
chr1	23888933
chr1	23895413
chr1	23904051
chr1	23907913
chr1	23912218
chr1	23955865
chr1	23961602
chr1	24018368
chr1	24053948
chr1	24117577
chr1	24127372
chr1	24136367
chr1	24151900
chr1	24278248
chr1	24281882
chr1	24286506
chr1	24306887
chr1	24336112
chr1	24345451
chr1	24346784
chr1	24349348
chr1	24372945
chr1	24593023
chr1	24610538
chr1	24621002
chr1	24648906
chr1	24656507
chr1	24689695
chr1	24691885
chr1	24717926
chr1	24720635
chr1	24743603
chr1	24867686
chr1	25010369
chr1	25029108
chr1	25032364
chr1	25034460
chr1	25039778
chr1	25045494
chr1	25046795
chr1	25051464
chr1	25054191
chr1	25062369
chr1	25067997
chr1	25069030
chr1	25070365
chr1	25071509
chr1	25072787
chr1	25112904
chr1	25120004
chr1	25120498
chr1	25174632
chr1	25275948
chr1	25278482
chr1	25281794
chr1	25293382
chr1	25336863
chr1	25349018
chr1	25392521
chr1	25558920
chr1	25566510
chr1	25573919
chr1	25580625
chr1	25664889
chr1	25670500
chr1	25675526
chr1	25687878
chr1	25827936
chr1	25831817
chr1	25877377
chr1	25895575
chr1	25917175
chr1	25935264
chr1	25999523
chr1	26015056
chr1	26021730
chr1	26026780
chr1	26029010
chr1	26036642
chr1	26038283
chr1	26111220
chr1	26123490
chr1	26137474
chr1	26146410
chr1	26219153
chr1	26285152
chr1	26318911
chr1	26324833
chr1	26344461
chr1	26346339
chr1	26602948
chr1	26607141
chr1	26608711
chr1	26611407
chr1	26704760
chr1	26735223
chr1	26799713
chr1	26827690
chr1	26947439
chr1	27004166
chr1	27011865
chr1	27019599
chr1	27022145
chr1	27024795
chr1	27027957
chr1	27032428
chr1	27050298
chr1	27057504
chr1	27060681
chr1	27070754
chr1	27095509
chr1	27098383
chr1	27110764
chr1	27114317
chr1	27115838
chr1	27126526
chr1	27226923
chr1	27288553
chr1	27317940
chr1	27320218
chr1	27324320
chr1	27326104
chr1	27337685
chr1	27358140
chr1	27438901
chr1	27445607
chr1	27449367
chr1	27472572
chr1	27481659
chr1	27561194
chr1	27618850
chr1	27626075
chr1	27648592
chr1	27692012
chr1	27718924
chr1	27745031
chr1	27759710
chr1	27816851
chr1	27831894
chr1	27852110
chr1	27853523
chr1	27865495
chr1	27867013
chr1	27869018
chr1	27902115
chr1	27915434
chr1	27925857
chr1	27928799
chr1	27930629
chr1	27985549
chr1	28079053
chr1	28099791
chr1	28157379
chr1	28189852
chr1	28201906
chr1	28231296
chr1	28241209
chr1	28286386
chr1	28295447
chr1	28297136
chr1	28415139
chr1	28425751
chr1	28450408
chr1	28471232
chr1	28479867
chr1	28483547
chr1	28487644
chr1	28490499
chr1	28535566
chr1	28559477
chr1	28562338
chr1	28574016
chr1	28585794
chr1	28640706
chr1	28655490
chr1	28670114
chr1	28672872
chr1	28696641
chr1	28718718
chr1	28764616
chr1	28832618
chr1	28833069
chr1	28835580
chr1	28844716
chr1	28879450
chr1	28908334
chr1	28928344
chr1	28929551
chr1	28969520
chr1	28975179
chr1	29063271
chr1	29192583
chr1	29208752
chr1	29211629
chr1	29299127
chr1	29451085
chr1	29472397
chr1	29508618
chr1	29523632
chr1	29529513
chr1	29570483
chr1	29575837
chr1	29598381
chr1	29840002
chr1	30043023
chr1	30113156
chr1	30161479
chr1	30182600
chr1	30266105
chr1	30447388
chr1	30532023
chr1	30557028
chr1	30558746
chr1	31173904
chr1	31192301
chr1	31221115
chr1	31236621
chr1	31274751
chr1	31281318
chr1	31282519
chr1	31289533
chr1	31296990
chr1	31331564
chr1	31350554
chr1	31361505
chr1	31375187
chr1	31384371
chr1	31428677
chr1	31439800
chr1	31463478
chr1	31538457
chr1	31575371
chr1	31625394
chr1	31628306
chr1	31643805
chr1	31655372
chr1	31673118
chr1	31779316
chr1	31849894
chr1	31867642
chr1	31870014
chr1	31882933
chr1	31883934
chr1	31886665
chr1	31895740
chr1	31907963
chr1	31956407
chr1	31971683
chr1	32014673
chr1	32039660
chr1	32043800
chr1	32059787
chr1	32110793
chr1	32112904
chr1	32129650
chr1	32155625
chr1	32166882
chr1	32169639
chr1	32170956
chr1	32177854
chr1	32180167
chr1	32227679
chr1	32254997
chr1	32264526
chr1	32281746
chr1	32309335
chr1	32403124
chr1	32404192
chr1	32410204
chr1	32420450
chr1	32421731
chr1	32429860
chr1	32479191
chr1	32480532
chr1	32514141
chr1	32532373
chr1	32537525
chr1	32538633
chr1	32566792
chr1	32573645
chr1	32599240
chr1	32645693
chr1	32701916
chr1	32706158
chr1	32707068
chr1	32732978
chr1	32757504
chr1	32787525
chr1	32816666
chr1	32819674
chr1	32828041
chr1	32859940
chr1	32870759
chr1	32958462
chr1	32986209
chr1	33117085
chr1	33160902
chr1	33169563
chr1	33190985
chr1	33225862
chr1	33227058
chr1	33232997
chr1	33241031
chr1	33263954
chr1	33266917
chr1	33282959
chr1	33405494
chr1	33430666
chr1	33447078
chr1	33455066
chr1	33458228
chr1	33473024
chr1	33502705
chr1	33562085
chr1	33564999
chr1	33592890
chr1	33609535
chr1	33629500
chr1	33647661
chr1	33684519
chr1	33722575
chr1	33766443
chr1	33782167
chr1	33783772
chr1	33793766
chr1	33804576
chr1	33808092
chr1	33812728
chr1	33815893
chr1	33829946
chr1	33831328
chr1	33833549
chr1	33850168
chr1	33853470
chr1	33855219
chr1	33856444
chr1	33862428
chr1	33899565
chr1	33900873
chr1	33924434
chr1	33938355
chr1	34078654
chr1	34409778
chr1	35252216
chr1	35450981
chr1	35496878
chr1	35497256
chr1	35513175
chr1	35545124
chr1	35658665
chr1	35688539
chr1	35914275
chr1	35915154
chr1	35917953
chr1	36004306
chr1	36005754
chr1	36023295
chr1	36107224
chr1	36181267
chr1	36183675
chr1	36240443
chr1	36348706
chr1	36391568
chr1	36554430
chr1	36602298
chr1	36615378
chr1	36621451
chr1	36622250
chr1	36626794
chr1	36653915
chr1	36669645
chr1	36689780
chr1	36706142
chr1	36714102
chr1	36765675
chr1	36772755
chr1	36786914
chr1	36789472
chr1	36808549
chr1	36818223
chr1	36831895
chr1	36834857
chr1	36839579
chr1	36852249
chr1	36874321
chr1	36885486
chr1	36886605
chr1	36916310
chr1	36930005
chr1	37920636
chr1	37930755
chr1	37937493
chr1	37940192
chr1	37942402
chr1	37945413
chr1	37980484
chr1	38000297
chr1	38003162
chr1	38019913
chr1	38040937
chr1	38072259
chr1	38274660
chr1	38325255
chr1	38325935
chr1	38398686
chr1	38412722
chr1	38424548
chr1	38455750
chr1	38461927
chr1	38466316
chr1	38478200
chr1	38495855
chr1	38541775
chr1	38604439
chr1	38605935
chr1	38686927
chr1	38917417
chr1	39201736
chr1	39325578
chr1	39427327
chr1	39456893
chr1	39491970
chr1	39558216
chr1	39569145
chr1	39572333
chr1	39577721
chr1	39607908
chr1	39620830
chr1	39624029
chr1	39633676
chr1	39636574
chr1	39644385
chr1	39649596
chr1	39651475
chr1	39657441
chr1	39657935
chr1	39661017
chr1	39670366
chr1	39696424
chr1	39735864
chr1	39738135
chr1	39763415
chr1	39812767
chr1	39851151
chr1	39853334
chr1	39861402
chr1	39864499
chr1	39872507
chr1	39873855
chr1	39875356
chr1	39876705
chr1	39897782
chr1	39916971
chr1	39919457
chr1	39927960
chr1	40006353
chr1	40025336
chr1	40041396
chr1	40042454
chr1	40079164
chr1	40091410
chr1	40112131
chr1	40164463
chr1	40204584
chr1	40265707
chr1	40311492
chr1	40311966
chr1	40318013
chr1	40349009
chr1	40358442
chr1	40359054
chr1	40400235
chr1	40481104
chr1	40498154
chr1	40505678
chr1	40627016
chr1	40723616
chr1	40781111
chr1	40840251
chr1	40841444
chr1	40856014
chr1	40858028
chr1	40916748
chr1	40942750
chr1	40974373
chr1	41139286
chr1	41157353
chr1	41332154
chr1	41341596
chr1	41343591
chr1	41364317
chr1	41402630
chr1	41405581
chr1	41410134
chr1	41433534
chr1	41442884
chr1	41445446
chr1	41446720
chr1	41447832
chr1	41469528
chr1	41568070
chr1	41575489
chr1	41589042
chr1	41618372
chr1	41799323
chr1	41898528
chr1	41948077
chr1	41952181
chr1	41958868
chr1	41962108
chr1	41964649
chr1	41968853
chr1	42039960
chr1	42079480
chr1	42083883
chr1	42089039
chr1	42092046
chr1	42092789
chr1	42097875
chr1	42105498
chr1	42131099
chr1	42136367
chr1	42138112
chr1	42143861
chr1	42179490
chr1	42204885
chr1	42217901
chr1	42237205
chr1	42249013
chr1	42278285
chr1	42328775
chr1	42335946
chr1	42368106
chr1	42385866
chr1	42612715
chr1	42643419
chr1	42645199
chr1	42680392
chr1	42785458
chr1	42801060
chr1	42921763
chr1	42950256
chr1	43124055
chr1	43147811
chr1	43149965
chr1	43231748
chr1	43232667
chr1	43282899
chr1	43379243
chr1	43390241
chr1	43403028
chr1	43405703
chr1	43406842
chr1	43416079
chr1	43424514
chr1	43427634
chr1	43429373
chr1	43432927
chr1	43437583
chr1	43444442
chr1	43464360
chr1	43465229
chr1	43504466
chr1	43522990
chr1	43524337
chr1	43526138
chr1	43539529
chr1	43672704
chr1	43695891
chr1	43697942
chr1	43815740
chr1	43824217
chr1	43833616
chr1	43838932
chr1	43855328
chr1	43918865
chr1	43920316
chr1	43938263
chr1	43941896
chr1	43959853
chr1	43989013
chr1	43994980
chr1	43996451
chr1	43997594
chr1	44024126
chr1	44048043
chr1	44053488
chr1	44116245
chr1	44177347
chr1	44229331
chr1	44240206
chr1	44266078
chr1	44287935
chr1	44300983
chr1	44324152
chr1	44327202
chr1	44334411
chr1	44378526
chr1	44395403
chr1	44398597
chr1	44445588
chr1	44514083
chr1	44538039
chr1	44679101
chr1	44686295
chr1	44793772
chr1	44955281
chr1	45061009
chr1	45087766
chr1	45094715
chr1	45097600
chr1	45112164
chr1	45118707
chr1	45139683
chr1	45172930
chr1	45197084
chr1	45205318
chr1	45241291
chr1	45265550
chr1	45268133
chr1	45273518
chr1	45277572
chr1	45285116
chr1	45361744
chr1	45412855
chr1	45452321
chr1	45477016
chr1	45477799
chr1	45480332
chr1	45657174
chr1	45712725
chr1	45732259
chr1	45769757
chr1	45956806
chr1	45965807
chr1	45987585
chr1	46016373
chr1	46135298
chr1	46152195
chr1	46153798
chr1	46216503
chr1	46235121
chr1	46268608
chr1	46337990
chr1	46379234
chr1	46395135
chr1	46396432
chr1	46420205
chr1	46598305
chr1	46603439
chr1	46649041
chr1	46713358
chr1	46769003
chr1	46806501
chr1	46986375
chr1	46988256
chr1	47082407
chr1	47109130
chr1	47139567
chr1	47644938
chr1	47658727
chr1	47806078
chr1	47845531
chr1	47875213
chr1	47897380
chr1	48142202
chr1	48176345
chr1	48254224
chr1	48938158
chr1	48960276
chr1	50814547
chr1	51110477
chr1	51425994
chr1	51435722
chr1	51444060
chr1	51529056
chr1	51655305
chr1	51701801
chr1	51727086
chr1	51730336
chr1	51780042
chr1	51985186
chr1	52033512
chr1	52035620
chr1	52078505
chr1	52082841
chr1	52102889
chr1	52108489
chr1	52110399
chr1	52114299
chr1	52127019
chr1	52129047
chr1	52137606
chr1	52156035
chr1	52250704
chr1	52344556
chr1	52363444
chr1	52365252
chr1	52372076
chr1	52382491
chr1	52390318
chr1	52435235
chr1	52436289
chr1	52439477
chr1	52468129
chr1	52499359
chr1	52503418
chr1	52520840
chr1	52658273
chr1	52660997
chr1	52704800
chr1	52728890
chr1	52831789
chr1	52870197
chr1	52989297
chr1	53017992
chr1	53040531
chr1	53128638
chr1	53152007
chr1	53163918
chr1	53169138
chr1	53174088
chr1	53192175
chr1	53280363
chr1	53387474
chr1	53480581
chr1	53490888
chr1	53509211
chr1	53513771
chr1	53552314
chr1	53573463
chr1	53575097
chr1	53578312
chr1	53581815
chr1	53587549
chr1	53601492
chr1	53612080
chr1	53638617
chr1	53642609
chr1	53646126
chr1	53647848
chr1	53649275
chr1	53685987
chr1	53704199
chr1	53712414
chr1	53744060
chr1	53791831
chr1	53847924
chr1	53878887
chr1	53914321
chr1	53914853
chr1	53992525
chr1	54008020
chr1	54018100
chr1	54038295
chr1	54083279
chr1	54086288
chr1	54105144
chr1	54120710
chr1	54122084
chr1	54151109
chr1	54200404
chr1	54202218
chr1	54206467
chr1	54247562
chr1	54362832
chr1	54423102
chr1	54437432
chr1	54587292
chr1	54601346
chr1	54695323
chr1	54719365
chr1	54738820
chr1	54745026
chr1	54760735
chr1	54792448
chr1	54800915
chr1	54828848
chr1	54843278
chr1	54849201
chr1	54851476
chr1	54869711
chr1	54873422
chr1	54954013
chr1	55010019
chr1	55181489
chr1	55237901
chr1	55276312
chr1	55280027
chr1	55316657
chr1	55322288
chr1	55323650
chr1	55326838
chr1	55332937
chr1	55350037
chr1	55370472
chr1	55371187
chr1	55416101
chr1	55480580
chr1	55547114
chr1	55593630
chr1	55657151
chr1	55680300
chr1	55743391
chr1	55774947
chr1	55776480
chr1	55792224
chr1	55828409
chr1	55844546
chr1	55892474
chr1	55895005
chr1	55909338
chr1	55912240
chr1	55956460
chr1	55969508
chr1	55973160
chr1	55985821
chr1	56008761
chr1	56010611
chr1	56046992
chr1	56050801
chr1	56076162
chr1	56089216
chr1	56098761
chr1	56115931
chr1	56160248
chr1	56161461
chr1	56162058
chr1	56166301
chr1	56169944
chr1	56177922
chr1	56182008
chr1	56182529
chr1	56183124
chr1	56184656
chr1	56186111
chr1	56190527
chr1	56192811
chr1	56200945
chr1	56207378
chr1	56239150
chr1	56248073
chr1	56278203
chr1	56279506
chr1	56293204
chr1	56299539
chr1	56314770
chr1	56335103
chr1	56348852
chr1	56421036
chr1	56440982
chr1	56446448
chr1	56526741
chr1	56530568
chr1	56532144
chr1	56539882
chr1	56546987
chr1	56562129
chr1	56564833
chr1	56602960
chr1	56619132
chr1	56721650
chr1	56767704
chr1	56796271
chr1	56798116
chr1	56802919
chr1	56825907
chr1	56841359
chr1	56895953
chr1	56912552
chr1	56914753
chr1	56943191
chr1	56991399
chr1	57045062
chr1	57093474
chr1	57142511
chr1	57265775
chr1	57286876
chr1	57298150
chr1	57332587
chr1	57765715
chr1	57785039
chr1	57819494
chr1	57832483
chr1	57877231
chr1	57888662
chr1	57935879
chr1	57940060
chr1	57945377
chr1	57955372
chr1	58603561
chr1	58861224
chr1	58867983
chr1	59012574
chr1	59046078
chr1	59050430
chr1	59058409
chr1	59084119
chr1	59094881
chr1	59184342
chr1	59193241
chr1	59212624
chr1	59218443
chr1	59221361
chr1	59229044
chr1	59230242
chr1	59235095
chr1	59239226
chr1	59249697
chr1	59280956
chr1	59283955
chr1	59289273
chr1	59314655
chr1	59321068
chr1	59347379
chr1	59349174
chr1	59364844
chr1	59369966
chr1	59398614
chr1	59452860
chr1	59481610
chr1	59486094
chr1	59491043
chr1	59492283
chr1	59495244
chr1	59509650
chr1	59523079
chr1	59528557
chr1	59550136
chr1	59582784
chr1	59594630
chr1	59602250
chr1	59608963
chr1	59612728
chr1	59616907
chr1	59639640
chr1	59652587
chr1	59680574
chr1	59684394
chr1	59690139
chr1	59758424
chr1	59762784
chr1	59782460
chr1	59798804
chr1	59833507
chr1	59841023
chr1	59859281
chr1	59874410
chr1	59893034
chr1	59947992
chr1	59949957
chr1	59951895
chr1	59986074
chr1	59986856
chr1	60015861
chr1	60061702
chr1	60069894
chr1	60071417
chr1	60138679
chr1	60144731
chr1	60158483
chr1	60167259
chr1	60169342
chr1	60171710
chr1	60173047
chr1	60196690
chr1	60198168
chr1	60204051
chr1	60216484
chr1	60225303
chr1	60242994
chr1	60413187
chr1	60437243
chr1	60598867
chr1	61508844
chr1	61542831
chr1	61545752
chr1	61548724
chr1	61607586
chr1	61623301
chr1	61649353
chr1	61784212
chr1	61803808
chr1	62107596
chr1	62158337
chr1	62159689
chr1	62190854
chr1	62223897
chr1	62353340
chr1	62808804
chr1	62901921
chr1	63087706
chr1	63154187
chr1	63155336
chr1	63217064
chr1	63249771
chr1	63953560
chr1	63988935
chr1	64059982
chr1	64083505
chr1	64087491
chr1	64101506
chr1	64127991
chr1	64157790
chr1	64164159
chr1	64180040
chr1	64187439
chr1	64197510
chr1	64212075
chr1	64239599
chr1	64240775
chr1	64241644
chr1	64245260
chr1	64260823
chr1	64265771
chr1	64287514
chr1	64293195
chr1	64339655
chr1	64343717
chr1	64379412
chr1	64386495
chr1	64397303
chr1	64433485
chr1	64434450
chr1	64472536
chr1	64499722
chr1	64503930
chr1	64505356
chr1	64508553
chr1	64548300
chr1	64553653
chr1	64598931
chr1	64602969
chr1	64604191
chr1	64627111
chr1	64629844
chr1	64649215
chr1	64689100
chr1	64694079
chr1	64935938
chr1	64942492
chr1	64980241
chr1	64981331
chr1	64983147
chr1	65023271
chr1	65064172
chr1	65090267
chr1	65199878
chr1	65363910
chr1	65376513
chr1	65381731
chr1	65383384
chr1	65399120
chr1	65431676
chr1	65467125
chr1	65468792
chr1	65531795
chr1	65532551
chr1	65533669
chr1	65661921
chr1	65878970
chr1	65886422
chr1	65891523
chr1	65895638
chr1	65980041
chr1	66277874
chr1	66286847
chr1	66298189
chr1	66356287
chr1	66648385
chr1	66708525
chr1	66728092
chr1	66737127
chr1	66752300
chr1	66776811
chr1	66797979
chr1	66820308
chr1	66837108
chr1	66840695
chr1	66870924
chr1	66881310
chr1	66882219
chr1	66900019
chr1	66905015
chr1	66930689
chr1	66932267
chr1	66969779
chr1	66971568
chr1	66993544
chr1	66999213
chr1	67005308
chr1	67006464
chr1	67008607
chr1	67012343
chr1	67018786
chr1	67019662
chr1	67030143
chr1	67041656
chr1	67084419
chr1	67390880
chr1	67396450
chr1	67417416
chr1	67479440
chr1	67485421
chr1	67486215
chr1	67507936
chr1	67519904
chr1	67526634
chr1	67813586
chr1	67896100
chr1	68001293
chr1	68036311
chr1	68039339
chr1	68041703
chr1	68084564
chr1	68116038
chr1	68118690
chr1	68148660
chr1	68152513
chr1	68153592
chr1	68154622
chr1	68158266
chr1	68166666
chr1	68190808
chr1	68201942
chr1	68213539
chr1	68214655
chr1	68215876
chr1	68232032
chr1	68233045
chr1	68257953
chr1	68259451
chr1	68269800
chr1	68297822
chr1	68306290
chr1	68319503
chr1	68326566
chr1	68346182
chr1	68354631
chr1	68355767
chr1	68363368
chr1	68364296
chr1	68383959
chr1	68414057
chr1	68453274
chr1	68578697
chr1	68593977
chr1	68606339
chr1	68607283
chr1	68608391
chr1	68639926
chr1	68668293
chr1	68698175
chr1	68710079
chr1	68735498
chr1	68794432
chr1	68796874
chr1	68808567
chr1	68824299
chr1	68824962
chr1	68850293
chr1	68875363
chr1	68963021
chr1	70500304
chr1	70509669
chr1	70510941
chr1	70538245
chr1	70556728
chr1	70598858
chr1	70612431
chr1	70622446
chr1	70671317
chr1	70687145
chr1	70819479
chr1	70953085
chr1	71546947
chr1	71556077
chr1	71932066
chr1	71987527
chr1	72031167
chr1	72103943
chr1	72466669
chr1	72591770
chr1	72748569
chr1	72750414
chr1	72863661
chr1	74624679
chr1	74627230
chr1	74664015
chr1	74671039
chr1	74682836
chr1	74686814
chr1	74822301
chr1	74861354
chr1	74891559
chr1	74929604
chr1	75116367
chr1	75118758
chr1	75180541
chr1	75198855
chr1	75300849
chr1	76189964
chr1	76251989
chr1	76457439
chr1	76472070
chr1	76539408
chr1	77367062
chr1	77497118
chr1	77505649
chr1	77685151
chr1	77781838
chr1	77788126
chr1	77813554
chr1	77836824
chr1	77844696
chr1	77933605
chr1	77939644
chr1	77977422
chr1	77980334
chr1	78002666
chr1	78005746
chr1	78022783
chr1	78071158
chr1	78148621
chr1	78215410
chr1	78225485
chr1	78245284
chr1	78283177
chr1	78297473
chr1	78298181
chr1	78298859
chr1	78300600
chr1	78342768
chr1	78354169
chr1	78355590
chr1	78366579
chr1	78400408
chr1	78445084
chr1	78470612
chr1	78471575
chr1	78561456
chr1	78567427
chr1	78610943
chr1	78693674
chr1	78695257
chr1	78740661
chr1	78741312
chr1	78743153
chr1	78745072
chr1	78752626
chr1	78769522
chr1	78805357
chr1	78806412
chr1	78886081
chr1	78957428
chr1	78985352
chr1	79043380
chr1	79182000
chr1	79297572
chr1	79299304
chr1	79350843
chr1	79509415
chr1	79545676
chr1	79594586
chr1	79659281
chr1	79789191
chr1	79820564
chr1	80365844
chr1	80378911
chr1	80448053
chr1	80841556
chr1	80883517
chr1	81593125
chr1	81616889
chr1	81621752
chr1	81622768
chr1	81624476
chr1	81639917
chr1	81640644
chr1	81764041
chr1	81771822
chr1	81857007
chr1	81889906
chr1	82126203
chr1	82136153
chr1	82147437
chr1	82148286
chr1	82155426
chr1	82161627
chr1	82168735
chr1	82266081
chr1	82267079
chr1	82268424
chr1	82386155
chr1	83568635
chr1	83974285
chr1	84167495
chr1	84367364
chr1	84464916
chr1	84543338
chr1	84561886
chr1	84569247
chr1	84583741
chr1	84612185
chr1	84622246
chr1	84713418
chr1	84718967
chr1	84719844
chr1	84737230
chr1	84764542
chr1	84831512
chr1	84836879
chr1	84843322
chr1	84845067
chr1	84878449
chr1	84899638
chr1	84944932
chr1	84972320
chr1	85039834
chr1	85064908
chr1	85083197
chr1	85098874
chr1	85164057
chr1	85164648
chr1	85178356
chr1	85192624
chr1	85208602
chr1	85216081
chr1	85219399
chr1	85224813
chr1	85313107
chr1	85320250
chr1	85410556
chr1	85411832
chr1	85412475
chr1	85425245
chr1	85426227
chr1	85575268
chr1	85594246
chr1	85600389
chr1	85614753
chr1	85667386
chr1	85681689
chr1	85686641
chr1	85691819
chr1	85710668
chr1	85725210
chr1	85742210
chr1	85744764
chr1	85755370
chr1	85763655
chr1	85774034
[truncated: 51,989 more rows]
