# Supplementary material for: RFECS: A Random-Forest Based Algorithm for Enhancer Identification from Chromatin State
Source: PLoS Comput Biol. 2013 Mar 14;9(3):e1002968. doi: 10.1371/journal.pcbi.1002968 (PMC3597546; doi:10.1371/journal.pcbi.1002968)
Supplement: Table S7 — IMR90 enhancers predicted using all 24 modifications. (XLS) [file pcbi.1002968.s014.xls]

## Sheet: Sheet1
Table S7.IMR90 enhancers predicted using all 24 modifications
Chromosome	location	voting_cutoff	Chromosome	location	voting_cutoff
chr1	10000	0.630769	chr14	92970400	0.938462
chr1	227500	0.661538	chr14	92978100	0.984615
chr1	267700	0.553846	chr14	92994400	0.969231
chr1	317800	0.6	chr14	92999100	0.615385
chr1	521400	0.507692	chr14	93002900	0.876923
chr1	570000	0.523077	chr14	93007200	0.969231
chr1	754000	0.553846	chr14	93012900	0.938462
chr1	787200	0.692308	chr14	93015800	0.538462
chr1	794400	0.569231	chr14	93020000	0.8
chr1	805600	0.676923	chr14	93031800	0.630769
chr1	826200	0.6	chr14	93045900	0.938462
chr1	842400	0.815385	chr14	93052800	1
chr1	846700	0.507692	chr14	93055800	0.646154
chr1	852200	0.507692	chr14	93064600	0.646154
chr1	856400	0.769231	chr14	93066900	0.953846
chr1	875800	0.907692	chr14	93070300	0.6
chr1	880200	0.676923	chr14	93075900	0.507692
chr1	911700	0.523077	chr14	93086700	0.861538
chr1	940900	0.553846	chr14	93091800	0.923077
chr1	959600	0.507692	chr14	93100200	0.738462
chr1	968600	0.538462	chr14	93103800	0.784615
chr1	976000	0.523077	chr14	93110600	0.969231
chr1	999700	0.753846	chr14	93113800	0.953846
chr1	1015100	0.507692	chr14	93116600	0.969231
chr1	1057600	0.723077	chr14	93122500	0.569231
chr1	1136800	0.507692	chr14	93137200	0.6
chr1	1143700	0.923077	chr14	93147600	0.830769
chr1	1174100	0.523077	chr14	93153400	0.723077
chr1	1185900	0.507692	chr14	93175600	0.892308
chr1	1194200	0.553846	chr14	93181300	0.707692
chr1	1196600	0.507692	chr14	93192700	0.630769
chr1	1200400	0.984615	chr14	93196400	0.8
chr1	1203100	0.6	chr14	93252300	0.923077
chr1	1206600	0.538462	chr14	93418400	0.753846
chr1	1211300	0.676923	chr14	93427700	0.538462
chr1	1217600	0.630769	chr14	93496600	0.661538
chr1	1240300	0.6	chr14	93509900	0.738462
chr1	1253900	0.6	chr14	93512600	0.738462
chr1	1297600	0.938462	chr14	93540500	0.692308
chr1	1307400	0.630769	chr14	93572000	0.523077
chr1	1358200	0.784615	chr14	93605800	0.738462
chr1	1365900	0.676923	chr14	93659600	0.8
chr1	1376600	0.507692	chr14	93701400	0.676923
chr1	1490400	0.6	chr14	93706900	0.907692
chr1	1594000	0.6	chr14	93725600	0.938462
chr1	1617900	0.907692	chr14	93736200	0.507692
chr1	1672700	0.507692	chr14	93771600	0.538462
chr1	1712000	0.538462	chr14	94370000	0.6
chr1	1714300	0.615385	chr14	94373400	0.569231
chr1	1790700	0.569231	chr14	94408200	0.753846
chr1	1837900	0.676923	chr14	94413300	0.523077
chr1	1850800	0.6	chr14	94418500	0.584615
chr1	1891700	0.584615	chr14	94426000	0.876923
chr1	2019900	0.707692	chr14	94429500	0.615385
chr1	2063400	0.630769	chr14	94432000	0.953846
chr1	2067100	0.569231	chr14	94437400	0.523077
chr1	2069700	0.523077	chr14	94443100	0.938462
chr1	2071800	0.6	chr14	94447400	0.846154
chr1	2106100	0.507692	chr14	94450800	0.969231
chr1	2140600	0.507692	chr14	94453700	0.830769
chr1	2144300	0.830769	chr14	94461700	0.630769
chr1	2146400	0.584615	chr14	94468300	0.6
chr1	2166100	0.553846	chr14	94529000	0.538462
chr1	2172000	0.553846	chr14	94567400	0.907692
chr1	2174800	0.615385	chr14	94587600	0.969231
chr1	2177600	0.6	chr14	94603200	0.676923
chr1	2187200	0.523077	chr14	94637800	0.784615
chr1	2207600	0.615385	chr14	94808800	0.984615
chr1	2211100	0.707692	chr14	94812000	0.861538
chr1	2222300	0.969231	chr14	94822000	0.538462
chr1	2225700	0.553846	chr14	94840300	0.984615
chr1	2244000	0.553846	chr14	94952700	0.584615
chr1	2248400	0.615385	chr14	95065800	0.861538
chr1	2253900	0.769231	chr14	95068700	0.738462
chr1	2262500	0.969231	chr14	95077200	0.984615
chr1	2292700	0.538462	chr14	95079400	0.523077
chr1	2313400	0.538462	chr14	95131600	0.753846
chr1	2381100	0.707692	chr14	95140600	0.938462
chr1	2383500	0.984615	chr14	95371200	0.938462
chr1	2391600	0.523077	chr14	95507700	0.661538
chr1	2401500	0.507692	chr14	95513500	0.907692
chr1	2455000	0.769231	chr14	95519100	0.569231
chr1	2466600	0.830769	chr14	95528000	0.676923
chr1	2479800	0.538462	chr14	95593300	0.538462
chr1	2684300	0.569231	chr14	95599500	0.707692
chr1	3223400	0.892308	chr14	95607000	0.523077
chr1	3229900	0.969231	chr14	95651800	0.6
chr1	3232100	0.8	chr14	95688700	0.553846
chr1	3236900	0.507692	chr14	95732000	0.984615
chr1	3341400	0.738462	chr14	95891000	0.523077
chr1	3388200	0.553846	chr14	95909100	0.876923
chr1	3390500	0.553846	chr14	95927600	0.584615
chr1	3412900	0.553846	chr14	95947100	0.569231
chr1	3418900	0.676923	chr14	95949800	0.984615
chr1	3421100	0.538462	chr14	95963300	0.584615
chr1	3460100	0.984615	chr14	95967500	0.8
chr1	3462400	0.815385	chr14	95970900	0.723077
chr1	3465000	0.8	chr14	95974000	0.723077
chr1	3530300	0.846154	chr14	95986100	0.815385
chr1	3535700	0.676923	chr14	95990300	0.953846
chr1	3641200	0.784615	chr14	95993800	0.769231
chr1	3692300	0.538462	chr14	95998000	0.846154
chr1	3812500	0.707692	chr14	96014300	0.876923
chr1	3845100	0.538462	chr14	96027600	0.615385
chr1	3995300	0.553846	chr14	96358400	0.907692
chr1	4363300	0.507692	chr14	96520400	0.923077
chr1	5998500	0.615385	chr14	96552700	0.769231
chr1	6040600	0.707692	chr14	96557000	0.569231
chr1	6043500	0.630769	chr14	96562300	0.923077
chr1	6067600	0.615385	chr14	96567300	0.876923
chr1	6112800	0.661538	chr14	96571200	0.953846
chr1	6305300	0.507692	chr14	96574300	0.723077
chr1	6333600	0.630769	chr14	96576600	0.615385
chr1	6336700	0.784615	chr14	96584400	0.892308
chr1	6377700	0.523077	chr14	96586500	0.676923
chr1	6390700	0.523077	chr14	96589000	1
chr1	6420000	0.523077	chr14	96592600	0.861538
chr1	6445800	0.569231	chr14	96597500	0.538462
chr1	6465000	0.753846	chr14	96603000	0.907692
chr1	6474400	0.615385	chr14	96606500	0.846154
chr1	6535900	0.523077	chr14	96608800	0.507692
chr1	6546700	0.753846	chr14	96612300	0.923077
chr1	6580300	0.553846	chr14	96615900	0.6
chr1	6599300	0.6	chr14	96626700	0.969231
chr1	6659500	0.569231	chr14	96628900	0.8
chr1	6664700	0.784615	chr14	96631400	0.784615
chr1	6746200	0.969231	chr14	96634000	0.984615
chr1	6748600	0.661538	chr14	96637100	0.553846
chr1	6756200	0.584615	chr14	96639900	0.784615
chr1	6780300	0.646154	chr14	96642100	0.861538
chr1	6784800	1	chr14	96645300	0.907692
chr1	6804100	0.938462	chr14	96648500	0.630769
chr1	6831000	0.8	chr14	96651400	0.507692
chr1	6855900	0.907692	chr14	96653600	0.553846
chr1	6859800	0.553846	chr14	96655800	0.830769
chr1	6861900	0.923077	chr14	96661300	0.538462
chr1	6864000	0.646154	chr14	96665300	0.723077
chr1	6867900	0.507692	chr14	96668500	0.815385
chr1	6880000	0.723077	chr14	96680800	0.6
chr1	6918100	0.584615	chr14	96682900	0.569231
chr1	6920300	0.984615	chr14	96685300	0.507692
chr1	6928900	0.707692	chr14	96687700	0.938462
chr1	6933900	0.938462	chr14	96691700	0.523077
chr1	6941100	0.723077	chr14	96700800	0.523077
chr1	6948700	0.661538	chr14	96710500	0.738462
chr1	7020600	0.584615	chr14	96713000	0.923077
chr1	7106500	0.6	chr14	96715500	0.892308
chr1	7130500	0.507692	chr14	96719600	0.938462
chr1	7178000	0.692308	chr14	96721900	0.553846
chr1	7279300	0.646154	chr14	96725600	0.523077
chr1	7281800	0.692308	chr14	96728000	0.784615
chr1	7283900	0.938462	chr14	96731900	0.723077
chr1	7286200	0.553846	chr14	96735600	0.969231
chr1	7289700	0.769231	chr14	96739800	0.846154
chr1	7309900	0.538462	chr14	96742100	0.769231
chr1	7313200	0.707692	chr14	96746200	0.569231
chr1	7323600	0.615385	chr14	96752500	0.661538
chr1	7327800	0.969231	chr14	96819200	0.523077
chr1	7339700	0.938462	chr14	99733100	0.6
chr1	7342100	0.984615	chr14	99882300	0.553846
chr1	7345300	0.892308	chr14	99894200	0.723077
chr1	7351900	0.861538	chr14	99903400	0.676923
chr1	7354700	0.646154	chr14	99978100	0.553846
chr1	7358500	0.830769	chr14	99988800	0.876923
chr1	7362100	0.861538	chr14	99991600	0.707692
chr1	7373800	0.569231	chr14	99997900	0.984615
chr1	7382900	0.630769	chr14	100003900	0.953846
chr1	7393900	0.876923	chr14	100015900	0.615385
chr1	7397000	0.553846	chr14	100028500	0.523077
chr1	7401700	0.584615	chr14	100035200	0.815385
chr1	7439600	0.953846	chr14	100041000	0.923077
chr1	7449100	0.707692	chr14	100043700	0.738462
chr1	7462100	0.953846	chr14	100046400	0.938462
chr1	7484800	0.6	chr14	100053300	0.569231
chr1	7514300	0.6	chr14	100057300	0.615385
chr1	7529600	0.907692	chr14	100079600	0.753846
chr1	7533400	0.907692	chr14	100082300	0.6
chr1	7537100	0.969231	chr14	100086500	0.676923
chr1	7539200	0.984615	chr14	100089700	0.969231
chr1	7542900	0.584615	chr14	100091900	0.507692
chr1	7545500	0.523077	chr14	100095300	0.692308
chr1	7551500	0.707692	chr14	100120800	0.615385
chr1	7587600	0.907692	chr14	100137400	0.569231
chr1	7594500	0.676923	chr14	100196700	0.538462
chr1	7610000	0.569231	chr14	100204000	0.523077
chr1	7676700	0.707692	chr14	100210500	0.907692
chr1	7703700	0.6	chr14	100212900	0.846154
chr1	7707400	0.830769	chr14	100215000	0.523077
chr1	7727800	0.6	chr14	100218800	0.984615
chr1	7870500	0.723077	chr14	100222700	0.923077
chr1	7907900	0.953846	chr14	100225100	0.953846
chr1	7948800	0.615385	chr14	100233500	0.615385
chr1	7963000	0.723077	chr14	100240200	0.615385
chr1	8001900	0.676923	chr14	100246300	0.784615
chr1	8009300	0.738462	chr14	100256700	0.676923
chr1	8014300	0.523077	chr14	100269400	0.569231
chr1	8017000	0.646154	chr14	100274900	0.523077
chr1	8042500	0.661538	chr14	100279200	0.507692
chr1	8048900	0.738462	chr14	100288200	0.538462
chr1	8052300	0.676923	chr14	100305200	0.692308
chr1	8054500	0.984615	chr14	100328800	0.553846
chr1	8062900	0.661538	chr14	100345800	0.907692
chr1	8065200	0.907692	chr14	100377100	0.892308
chr1	8067300	0.538462	chr14	100435000	0.830769
chr1	8075200	0.723077	chr14	100449000	0.569231
chr1	8078700	0.569231	chr14	100452900	0.523077
chr1	8089000	0.876923	chr14	100457600	0.753846
chr1	8092800	0.830769	chr14	100463500	0.892308
chr1	8100900	0.938462	chr14	100479100	0.523077
chr1	8106000	0.676923	chr14	100481700	0.861538
chr1	8108100	0.938462	chr14	100484200	0.861538
chr1	8116500	0.876923	chr14	100486700	0.507692
chr1	8119300	0.907692	chr14	100490000	0.723077
chr1	8121600	0.969231	chr14	100492200	0.553846
chr1	8135300	0.6	chr14	100495600	0.953846
chr1	8137500	1	chr14	100500300	0.523077
chr1	8139800	0.553846	chr14	100515700	0.538462
chr1	8144100	0.892308	chr14	100518000	0.615385
chr1	8147500	0.584615	chr14	100524100	0.507692
chr1	8150400	1	chr14	100543200	0.523077
chr1	8152600	0.661538	chr14	100563200	0.876923
chr1	8154700	0.892308	chr14	100570000	0.769231
chr1	8157900	0.953846	chr14	100574500	0.523077
chr1	8167100	0.676923	chr14	100578400	0.523077
chr1	8177300	0.984615	chr14	100632000	0.507692
chr1	8180400	0.861538	chr14	100659300	0.507692
chr1	8183000	0.938462	chr14	100690400	0.6
chr1	8187600	0.830769	chr14	100745300	0.523077
chr1	8194000	0.892308	chr14	100763900	0.630769
chr1	8198000	0.938462	chr14	100807900	0.938462
chr1	8215100	0.938462	chr14	100829100	0.907692
chr1	8217300	0.507692	chr14	100831200	0.6
chr1	8222100	0.507692	chr14	100838900	0.507692
chr1	8227800	0.769231	chr14	100844200	0.507692
chr1	8230100	0.938462	chr14	100852700	0.784615
chr1	8242400	0.584615	chr14	100858900	0.553846
chr1	8254700	0.784615	chr14	100875100	0.984615
chr1	8258000	0.953846	chr14	100884000	0.892308
chr1	8260200	0.769231	chr14	100906700	0.753846
chr1	8262700	0.969231	chr14	100910300	0.723077
chr1	8265300	0.861538	chr14	100943000	0.846154
chr1	8268900	0.507692	chr14	101112300	0.507692
chr1	8272200	0.984615	chr14	101115600	0.753846
chr1	8275100	0.861538	chr14	101118600	0.6
chr1	8277600	0.892308	chr14	101127500	0.507692
chr1	8279800	0.723077	chr14	101132500	0.538462
chr1	8282000	0.523077	chr14	101146600	0.523077
chr1	8285100	0.846154	chr14	101155300	0.984615
chr1	8287400	0.707692	chr14	101159600	0.969231
chr1	8290100	1	chr14	101213500	0.769231
chr1	8292400	0.646154	chr14	101228300	0.830769
chr1	8298500	0.923077	chr14	101242300	0.923077
chr1	8317200	0.676923	chr14	101282500	0.969231
chr1	8319700	0.892308	chr14	101309200	0.769231
chr1	8330200	0.523077	chr14	101381000	0.646154
chr1	8338700	0.538462	chr14	101446300	0.830769
chr1	8343200	0.507692	chr14	101448600	0.753846
chr1	8363500	1	chr14	101461300	0.692308
chr1	8374800	0.769231	chr14	101467700	0.861538
chr1	8403700	1	chr14	101471400	0.876923
chr1	8409200	0.538462	chr14	101525000	0.876923
chr1	8412000	0.553846	chr14	101529100	0.661538
chr1	8424000	0.569231	chr14	101538900	0.507692
chr1	8431300	0.707692	chr14	101541300	0.8
chr1	8434700	0.723077	chr14	101544000	0.738462
chr1	8438600	0.553846	chr14	101872100	0.846154
chr1	8452300	0.523077	chr14	101874700	0.538462
chr1	8455100	0.938462	chr14	101942400	0.6
chr1	8457200	0.969231	chr14	101947400	0.876923
chr1	8465600	0.553846	chr14	102094900	0.615385
chr1	8468400	0.969231	chr14	102173800	0.507692
chr1	8472500	0.846154	chr14	102186300	0.553846
chr1	8499200	0.830769	chr14	102291500	0.507692
chr1	8501900	0.876923	chr14	102301400	0.507692
chr1	8508900	0.723077	chr14	102394400	0.938462
chr1	8516600	0.938462	chr14	102429100	0.938462
chr1	8520100	0.507692	chr14	102439000	0.953846
chr1	8522300	0.784615	chr14	102447200	0.907692
chr1	8526300	0.553846	chr14	102487000	0.553846
chr1	8537700	0.753846	chr14	102495300	0.892308
chr1	8541900	0.507692	chr14	102517000	0.523077
chr1	8557800	0.523077	chr14	102522000	0.630769
chr1	8567000	0.538462	chr14	102529600	0.523077
chr1	8570500	0.876923	chr14	102537900	0.984615
chr1	8577600	0.692308	chr14	102563000	0.8
chr1	8584300	0.6	chr14	102653600	0.8
chr1	8587300	0.584615	chr14	102701800	0.938462
chr1	8600900	0.892308	chr14	102719800	0.584615
chr1	8613000	0.569231	chr14	102722300	0.969231
chr1	8624000	0.738462	chr14	102729500	0.692308
chr1	8627600	0.892308	chr14	102739000	0.707692
chr1	8631500	0.692308	chr14	102744400	0.769231
chr1	8656100	0.676923	chr14	102746500	0.923077
chr1	8658900	0.661538	chr14	102749800	0.676923
chr1	8686800	0.969231	chr14	102761800	0.876923
chr1	8689800	0.738462	chr14	102780800	0.523077
chr1	8707700	0.753846	chr14	102856700	0.646154
chr1	8712100	0.569231	chr14	102859000	0.676923
chr1	8721800	0.876923	chr14	102904600	0.615385
chr1	8724100	0.861538	chr14	102941300	0.8
chr1	8726800	0.815385	chr14	103006700	0.507692
chr1	8730900	0.661538	chr14	103018700	0.615385
chr1	8739500	0.507692	chr14	103046300	0.907692
chr1	8741700	0.553846	chr14	103052800	0.507692
chr1	8747300	0.738462	chr14	103112100	0.661538
chr1	8749400	0.538462	chr14	103126400	0.584615
chr1	8758300	0.538462	chr14	103242700	0.553846
chr1	8760400	0.538462	chr14	103261800	0.569231
chr1	8767400	0.569231	chr14	103266300	0.953846
chr1	8772700	0.769231	chr14	103291200	0.523077
chr1	8777800	0.784615	chr14	103295700	0.630769
chr1	8782200	0.738462	chr14	103315900	0.538462
chr1	8800500	0.969231	chr14	103360000	0.969231
chr1	8869600	0.738462	chr14	103416300	0.661538
chr1	8873400	0.6	chr14	103453800	0.815385
chr1	8875600	0.553846	chr14	103488800	0.6
chr1	8883000	1	chr14	103542100	0.553846
chr1	8909200	0.938462	chr14	103550600	0.738462
chr1	8933800	0.769231	chr14	103557800	0.507692
chr1	8940500	0.784615	chr14	103571700	0.507692
chr1	8950300	0.830769	chr14	103574800	0.815385
chr1	8960200	0.769231	chr14	103579000	0.784615
chr1	8964100	1	chr14	103584600	0.784615
chr1	8966300	0.523077	chr14	103588500	0.907692
chr1	8968700	0.676923	chr14	103597600	0.923077
chr1	8978400	0.723077	chr14	103603600	0.892308
chr1	9002300	0.553846	chr14	103610400	0.923077
chr1	9007400	0.6	chr14	103621600	0.553846
chr1	9046500	1	chr14	103661000	0.584615
chr1	9065400	0.738462	chr14	103665500	0.615385
chr1	9089600	0.661538	chr14	103675400	0.646154
chr1	9118700	0.861538	chr14	103712300	0.6
chr1	9122100	0.753846	chr14	103759400	0.6
chr1	9125200	0.676923	chr14	103769400	0.507692
chr1	9127500	1	chr14	103781800	0.907692
chr1	9129700	0.784615	chr14	103823100	0.769231
chr1	9145800	0.769231	chr14	103828400	1
chr1	9161100	0.676923	chr14	103834700	0.738462
chr1	9171100	0.646154	chr14	103839100	1
chr1	9203400	0.523077	chr14	103849100	0.676923
chr1	9211500	0.615385	chr14	103857700	0.553846
chr1	9224100	0.984615	chr14	103867900	0.676923
chr1	9226800	0.646154	chr14	103870400	0.538462
chr1	9244500	0.584615	chr14	103884300	0.646154
chr1	9246700	0.907692	chr14	103889600	0.8
chr1	9253500	0.538462	chr14	103894300	0.523077
chr1	9256500	0.938462	chr14	103911700	0.630769
chr1	9260400	0.553846	chr14	103923000	0.676923
chr1	9267400	0.969231	chr14	103950300	0.769231
chr1	9271600	0.907692	chr14	103955500	0.830769
chr1	9293100	0.523077	chr14	103985300	0.584615
chr1	9299900	0.615385	chr14	103994000	0.507692
chr1	9327300	0.723077	chr14	104007100	0.984615
chr1	9335800	0.969231	chr14	104013300	0.584615
chr1	9340700	1	chr14	104024600	0.523077
chr1	9343400	0.507692	chr14	104043200	0.846154
chr1	9350400	1	chr14	104061700	0.6
chr1	9355500	0.507692	chr14	104064200	0.553846
chr1	9360500	0.907692	chr14	104073800	0.507692
chr1	9363500	0.923077	chr14	104091200	0.938462
chr1	9375700	0.646154	chr14	104104800	0.507692
chr1	9378000	0.646154	chr14	104123900	0.523077
chr1	9381500	0.753846	chr14	104130500	0.892308
chr1	9387000	0.984615	chr14	104163000	0.569231
chr1	9409700	0.523077	chr14	104184800	0.538462
chr1	9431900	0.876923	chr14	104228600	0.646154
chr1	9437400	0.846154	chr14	104346900	0.584615
chr1	9458100	0.830769	chr14	104376900	0.507692
chr1	9462200	0.969231	chr14	104544500	0.830769
chr1	9464500	0.553846	chr14	105106500	0.646154
chr1	9473400	1	chr14	105132400	0.830769
chr1	9498900	1	chr14	105140100	0.507692
chr1	9504500	0.907692	chr14	105143500	0.507692
chr1	9509200	0.876923	chr14	105146100	0.553846
chr1	9516100	0.861538	chr14	105148400	0.815385
chr1	9533300	0.6	chr14	105154500	0.507692
chr1	9551300	0.553846	chr14	105175000	0.507692
chr1	9656800	0.507692	chr14	105202700	0.892308
chr1	9687200	0.8	chr14	105210000	0.846154
chr1	9719700	0.984615	chr14	105213100	0.707692
chr1	9731800	0.938462	chr14	105216600	0.861538
chr1	9751300	0.523077	chr14	105235100	0.6
chr1	9760600	0.969231	chr14	105264300	0.569231
chr1	9765500	0.8	chr14	105272000	0.8
chr1	9779400	0.969231	chr14	105287300	0.569231
chr1	9785200	0.553846	chr14	105399900	0.538462
chr1	9813500	0.676923	chr14	105434500	0.569231
chr1	9819500	0.523077	chr14	105437200	0.846154
chr1	9826900	0.984615	chr14	105440300	0.846154
chr1	9885800	0.569231	chr14	105442700	0.784615
chr1	9927800	0.676923	chr14	105446600	0.523077
chr1	9935400	0.553846	chr14	105485300	0.538462
chr1	9942000	0.815385	chr14	105491400	0.984615
chr1	9944700	0.507692	chr14	105494600	0.784615
chr1	9950400	0.861538	chr14	105512300	0.692308
chr1	9953700	0.861538	chr14	105533900	0.553846
chr1	10010600	0.553846	chr14	105536200	0.615385
chr1	10045100	0.507692	chr14	105554800	0.553846
chr1	10090900	0.615385	chr14	105556900	0.815385
chr1	10106200	0.938462	chr14	105642700	0.553846
chr1	10116000	0.907692	chr14	105742000	0.584615
chr1	10125200	0.830769	chr14	105784100	0.523077
chr1	10127300	0.938462	chr14	105789100	0.507692
chr1	10134700	0.969231	chr14	105797000	0.615385
chr1	10168500	0.784615	chr14	105830900	0.676923
chr1	10182900	0.646154	chr14	105837400	0.723077
chr1	10213200	0.6	chr15	22881200	0.630769
chr1	10313000	0.553846	chr15	22904400	0.646154
chr1	10398400	0.523077	chr15	22908800	0.861538
chr1	10421200	0.707692	chr15	22911100	0.8
chr1	10437700	0.892308	chr15	22984800	0.923077
chr1	10440900	1	chr15	22996600	0.738462
chr1	10448200	0.8	chr15	22999800	0.984615
chr1	10463800	0.523077	chr15	23027600	0.584615
chr1	10475700	0.830769	chr15	23935900	0.769231
chr1	10488400	0.661538	chr15	25104400	0.846154
chr1	10498900	0.6	chr15	25108200	0.707692
chr1	10511500	0.523077	chr15	25123500	0.676923
chr1	10519200	0.846154	chr15	25656100	0.507692
chr1	10568900	0.8	chr15	25749700	0.738462
chr1	10571100	0.923077	chr15	25930200	0.630769
chr1	10575800	0.553846	chr15	25936900	0.553846
chr1	10588700	0.830769	chr15	25982500	0.830769
chr1	10591100	0.569231	chr15	26020800	0.923077
chr1	10635500	0.6	chr15	26023900	0.769231
chr1	10657300	0.769231	chr15	26028500	0.615385
chr1	10659800	0.969231	chr15	26030600	0.953846
chr1	10667700	0.630769	chr15	26033300	0.907692
chr1	10692600	0.753846	chr15	26035600	0.753846
chr1	10885100	0.784615	chr15	26043900	0.538462
chr1	11036000	0.507692	chr15	26075300	0.646154
chr1	11097900	0.815385	chr15	26077900	0.553846
chr1	11194300	0.523077	chr15	26094400	0.707692
chr1	11199100	0.815385	chr15	26098200	0.584615
chr1	11219000	0.953846	chr15	26105500	0.523077
chr1	11327900	0.846154	chr15	26121700	0.569231
chr1	11342100	0.784615	chr15	26129300	1
chr1	11702700	0.6	chr15	26131800	0.676923
chr1	11753300	0.569231	chr15	26146200	0.523077
chr1	11780000	0.676923	chr15	26150600	0.723077
chr1	11790300	0.646154	chr15	26179300	0.753846
chr1	11792800	0.523077	chr15	26329200	0.846154
chr1	11845300	0.584615	chr15	26332800	0.553846
chr1	11847700	0.907692	chr15	27110000	0.661538
chr1	11851200	0.969231	chr15	28331600	0.569231
chr1	11856700	0.538462	chr15	28378400	0.630769
chr1	11882000	0.507692	chr15	29138200	0.769231
chr1	11899000	0.676923	chr15	29142400	0.923077
chr1	11979100	0.646154	chr15	29248100	0.569231
chr1	11987900	0.738462	chr15	29253300	0.984615
chr1	11991200	0.907692	chr15	29259000	0.553846
chr1	12050900	0.507692	chr15	29261100	0.923077
chr1	12100900	0.707692	chr15	29265300	0.615385
chr1	12112300	1	chr15	29269800	0.953846
chr1	12128200	0.538462	chr15	29277500	0.707692
chr1	12136100	0.923077	chr15	29301400	0.830769
chr1	12139800	0.538462	chr15	29337000	0.661538
chr1	12143900	0.630769	chr15	29570900	0.969231
chr1	12156700	0.676923	chr15	29657000	0.538462
chr1	12160400	0.6	chr15	29904700	0.861538
chr1	12173100	0.538462	chr15	29960500	0.615385
chr1	12181800	0.984615	chr15	29963300	0.753846
chr1	12185200	0.646154	chr15	29978100	0.615385
chr1	12192500	0.507692	chr15	29983600	0.6
chr1	12204000	1	chr15	30029000	0.615385
chr1	12208000	0.661538	chr15	30063200	0.615385
chr1	12210400	0.507692	chr15	30067100	0.615385
chr1	12213600	0.938462	chr15	30087900	0.553846
chr1	12218500	0.815385	chr15	30097500	0.6
chr1	12222200	0.984615	chr15	30107900	0.584615
chr1	12235500	0.6	chr15	30116100	0.523077
chr1	12238400	0.907692	chr15	30119800	0.753846
chr1	12244500	0.938462	chr15	30133000	0.523077
chr1	12246600	0.507692	chr15	30136000	0.907692
chr1	12269100	0.692308	chr15	30152600	0.892308
chr1	12335700	0.6	chr15	30175600	0.923077
chr1	12356600	0.553846	chr15	30177900	0.553846
chr1	12363600	0.507692	chr15	30181700	0.830769
chr1	12465200	0.569231	chr15	30206400	0.753846
chr1	12467300	0.907692	chr15	30210000	0.969231
chr1	12484100	0.523077	chr15	30213200	0.538462
chr1	12493800	0.615385	chr15	30217100	0.969231
chr1	12497000	0.738462	chr15	30226800	0.984615
chr1	12507400	0.846154	chr15	30230600	0.892308
chr1	12509500	0.969231	chr15	30335300	0.507692
chr1	12515000	0.892308	chr15	30776700	0.707692
chr1	12517300	0.969231	chr15	30942900	0.6
chr1	12519500	0.553846	chr15	31058800	0.507692
chr1	12521600	0.984615	chr15	31216800	0.507692
chr1	12524900	0.984615	chr15	31220600	0.738462
chr1	12534600	0.692308	chr15	31246400	0.861538
chr1	12538500	0.969231	chr15	31306200	0.861538
chr1	12541000	0.984615	chr15	31309300	0.507692
chr1	12545500	0.723077	chr15	31316700	0.984615
chr1	12570400	0.553846	chr15	31325500	0.953846
chr1	12585500	0.661538	chr15	31334500	0.615385
chr1	12588600	0.815385	chr15	31361900	0.784615
chr1	12600500	0.861538	chr15	31372000	0.892308
chr1	12603000	0.738462	chr15	31384000	0.615385
chr1	12610200	1	chr15	31397500	0.661538
chr1	12612900	0.953846	chr15	31529000	0.923077
chr1	12616700	0.984615	chr15	31631500	0.907692
chr1	12619300	0.507692	chr15	31645800	0.938462
chr1	12625400	0.569231	chr15	31649200	0.569231
chr1	12633700	0.538462	chr15	31658300	0.553846
chr1	12653800	0.876923	chr15	31665100	0.630769
chr1	12656800	0.846154	chr15	31680800	0.523077
chr1	12662200	0.969231	chr15	31689700	0.707692
chr1	12664600	0.969231	chr15	31695200	0.707692
chr1	12670900	0.615385	chr15	31727300	1
chr1	12674600	0.538462	chr15	31729400	0.538462
chr1	12680100	0.784615	chr15	31733100	0.569231
chr1	12710300	0.661538	chr15	31735600	0.738462
chr1	12719300	0.676923	chr15	31750000	0.553846
chr1	13053000	0.584615	chr15	31764300	0.969231
chr1	13103000	0.646154	chr15	31781100	0.861538
chr1	13219900	0.569231	chr15	31846700	0.953846
chr1	13320000	0.630769	chr15	31883000	0.907692
chr1	13607100	0.523077	chr15	31890800	0.784615
chr1	13992400	0.569231	chr15	31898600	0.984615
chr1	14084000	0.523077	chr15	31901700	0.738462
chr1	14091300	0.538462	chr15	32815400	0.523077
chr1	14093700	0.861538	chr15	32935400	0.815385
chr1	14106800	0.523077	chr15	32943700	0.646154
chr1	14109100	0.507692	chr15	32952000	0.938462
chr1	14111700	0.584615	chr15	32955400	0.569231
chr1	14287100	0.615385	chr15	32957600	0.569231
chr1	14740600	1	chr15	32962900	0.738462
chr1	14763500	0.553846	chr15	32969600	0.661538
chr1	14767900	0.769231	chr15	32975000	0.984615
chr1	14770000	0.553846	chr15	32977300	0.523077
chr1	14813400	0.907692	chr15	32980100	0.923077
chr1	14825700	0.538462	chr15	32993900	0.523077
chr1	14838400	0.6	chr15	32997600	0.753846
chr1	14842100	0.6	chr15	33002100	0.984615
chr1	14844200	0.923077	chr15	33008100	0.692308
chr1	14846500	0.876923	chr15	33023000	0.584615
chr1	14849600	0.769231	chr15	33059400	0.553846
chr1	14870100	0.661538	chr15	33062800	0.507692
chr1	15059800	0.661538	chr15	33066500	1
chr1	15068900	1	chr15	33068900	0.615385
chr1	15072300	0.584615	chr15	33076600	0.553846
chr1	15083500	0.523077	chr15	33079400	0.861538
chr1	15152900	0.969231	chr15	33082900	0.923077
chr1	15162600	0.815385	chr15	33088500	0.507692
chr1	15169200	0.923077	chr15	33094800	1
chr1	15176700	0.8	chr15	33111400	0.753846
chr1	15237000	0.615385	chr15	33114900	0.569231
chr1	15241900	0.676923	chr15	33117200	0.938462
chr1	15253100	0.907692	chr15	33121000	0.953846
chr1	15256200	0.907692	chr15	33124600	0.753846
chr1	15266600	0.523077	chr15	33127200	0.861538
chr1	15269700	1	chr15	33131100	0.861538
chr1	15274300	0.507692	chr15	33133500	0.923077
chr1	15276800	0.615385	chr15	33136000	0.538462
chr1	15295400	0.815385	chr15	33139900	0.523077
chr1	15298400	0.830769	chr15	33142700	0.830769
chr1	15307400	0.523077	chr15	33145700	0.876923
chr1	15322900	0.923077	chr15	33148400	0.984615
chr1	15335500	0.769231	chr15	33150500	0.8
chr1	15354700	0.507692	chr15	33154700	0.907692
chr1	15358000	0.538462	chr15	33157700	0.523077
chr1	15373100	0.569231	chr15	33159900	0.784615
chr1	15415600	0.723077	chr15	33162600	0.953846
chr1	15427100	0.769231	chr15	33165300	0.923077
chr1	15455300	0.846154	chr15	33167900	0.769231
chr1	15482800	0.738462	chr15	33170300	0.753846
chr1	15485700	0.815385	chr15	33172400	0.523077
chr1	15488000	0.815385	chr15	33176400	0.661538
chr1	15495300	0.923077	chr15	33179400	0.784615
chr1	15499100	0.784615	chr15	33181900	0.538462
chr1	15503100	0.615385	chr15	33194900	0.553846
chr1	15505700	0.923077	chr15	33198100	0.753846
chr1	15508200	0.569231	chr15	33200600	0.969231
chr1	15513800	0.661538	chr15	33206500	0.676923
chr1	15516400	0.707692	chr15	33209100	0.707692
chr1	15527400	0.876923	chr15	33212400	0.969231
chr1	15533000	0.507692	chr15	33215200	0.723077
chr1	15541300	0.8	chr15	33218600	0.830769
chr1	15599400	0.738462	chr15	33220700	0.646154
chr1	15617100	0.846154	chr15	33228600	0.553846
chr1	15650200	0.923077	chr15	33234600	0.876923
chr1	15655800	0.584615	chr15	33236700	0.646154
chr1	15659200	0.6	chr15	33243500	0.784615
chr1	15664400	0.892308	chr15	33245700	0.769231
chr1	15668600	0.892308	chr15	33248700	0.830769
chr1	15679000	0.938462	chr15	33251600	0.969231
chr1	15681400	0.830769	chr15	33259300	0.676923
chr1	15683700	0.815385	chr15	33263400	0.584615
chr1	15697900	0.6	chr15	33267300	0.738462
chr1	15733900	0.769231	chr15	33269800	0.661538
chr1	15742800	0.815385	chr15	33272200	0.984615
chr1	15753500	0.753846	chr15	33275800	0.876923
chr1	15756600	0.507692	chr15	33277900	0.738462
chr1	15759800	0.876923	chr15	33280200	0.723077
chr1	15781100	0.584615	chr15	33282500	0.692308
chr1	15870200	0.615385	chr15	33284700	0.646154
chr1	15942400	0.538462	chr15	33287200	0.861538
chr1	15947000	0.738462	chr15	33289600	0.738462
chr1	16007400	0.969231	chr15	33294400	0.523077
chr1	16018100	0.569231	chr15	33300800	0.584615
chr1	16030200	0.615385	chr15	33306200	0.923077
chr1	16041300	0.523077	chr15	33314900	0.692308
chr1	16068000	0.538462	chr15	33318700	0.553846
chr1	16076500	0.846154	chr15	33351600	0.615385
chr1	16115200	0.507692	chr15	33356500	0.646154
chr1	16119200	0.692308	chr15	33358800	0.784615
chr1	16121800	1	chr15	33361000	0.892308
chr1	16125800	0.984615	chr15	33372000	0.584615
chr1	16129000	0.723077	chr15	33376300	0.661538
chr1	16142400	0.753846	chr15	33378900	0.830769
chr1	16158700	0.507692	chr15	33381100	0.676923
chr1	16214500	0.553846	chr15	33384700	0.553846
chr1	16219900	0.938462	chr15	33386800	0.923077
chr1	16229700	0.953846	chr15	33390500	0.938462
chr1	16242900	0.8	chr15	33392900	0.553846
chr1	16246300	0.615385	chr15	33396900	0.923077
chr1	16249800	0.615385	chr15	33400700	0.830769
chr1	16265700	0.630769	chr15	33404600	0.907692
chr1	16276300	0.815385	chr15	33406800	0.923077
chr1	16279500	0.969231	chr15	33412000	0.784615
chr1	16283000	0.507692	chr15	33418900	0.969231
chr1	16285400	0.523077	chr15	33422200	0.569231
chr1	16292800	0.692308	chr15	33424500	0.692308
chr1	16309700	0.815385	chr15	33427900	0.646154
chr1	16335700	0.769231	chr15	33430400	0.538462
chr1	16339700	0.523077	chr15	33571200	0.523077
chr1	16346500	0.784615	chr15	33993200	0.784615
chr1	16353400	0.553846	chr15	34013400	0.507692
chr1	16359400	0.815385	chr15	34153200	0.784615
chr1	16382800	0.553846	chr15	34158200	0.523077
chr1	16402800	0.923077	chr15	34203200	0.615385
chr1	16405600	0.938462	chr15	34277800	0.738462
chr1	16409200	0.707692	chr15	34280500	0.523077
chr1	16415700	0.830769	chr15	34341500	0.923077
chr1	16428400	0.569231	chr15	34348600	0.984615
chr1	16438700	0.630769	chr15	34351100	0.630769
chr1	16449300	0.507692	chr15	34415200	0.738462
chr1	16466200	0.815385	chr15	34531800	0.969231
chr1	16470700	0.753846	chr15	34589400	0.676923
chr1	16473800	0.8	chr15	34597300	0.584615
chr1	16477800	0.8	chr15	34870200	0.538462
chr1	16483900	0.584615	chr15	34880400	0.615385
chr1	16491000	0.984615	chr15	34921200	0.769231
chr1	16494400	0.769231	chr15	34936600	0.938462
chr1	16500300	0.769231	chr15	34942500	0.707692
chr1	16502800	0.907692	chr15	35001000	0.892308
chr1	16505600	0.630769	chr15	35010200	0.861538
chr1	16508600	0.984615	chr15	35014200	0.8
chr1	16511200	0.676923	chr15	35018900	0.907692
chr1	16514600	0.876923	chr15	35088000	0.507692
chr1	16531700	0.507692	chr15	35092500	0.815385
chr1	16570900	0.584615	chr15	35100600	0.569231
chr1	16575700	0.723077	chr15	35102800	0.953846
chr1	16582900	0.523077	chr15	35105000	0.923077
chr1	16585400	0.538462	chr15	35108400	0.538462
chr1	16587700	0.907692	chr15	35110900	0.830769
chr1	16593500	0.523077	chr15	35129800	0.969231
chr1	16651200	0.584615	chr15	35145500	0.6
chr1	16675500	0.692308	chr15	35178600	0.969231
chr1	16690300	0.553846	chr15	35182000	0.938462
chr1	16696300	0.523077	chr15	35331300	0.738462
chr1	16699200	0.907692	chr15	35353400	0.538462
chr1	16702300	0.953846	chr15	35372600	0.984615
chr1	16705000	0.569231	chr15	35382000	0.815385
chr1	16713300	0.692308	chr15	35389100	0.538462
chr1	16719300	0.538462	chr15	35396600	0.507692
chr1	16723300	0.769231	chr15	35422700	0.615385
chr1	16914600	0.523077	chr15	35432700	0.8
chr1	16918600	0.830769	chr15	35434800	0.907692
chr1	16932300	0.6	chr15	35437500	0.846154
chr1	16945400	0.538462	chr15	35443500	0.507692
chr1	16947600	0.738462	chr15	35454700	0.861538
chr1	16980900	0.615385	chr15	35459000	0.815385
chr1	17004700	0.507692	chr15	35462800	0.984615
chr1	17097100	0.953846	chr15	35465800	0.507692
chr1	17099600	0.584615	chr15	35549000	0.953846
chr1	17236600	0.523077	chr15	35564200	0.923077
chr1	17278300	0.569231	chr15	35573900	0.538462
chr1	17287400	0.615385	chr15	35581500	0.892308
chr1	17294000	0.553846	chr15	35585900	0.892308
chr1	17305400	0.507692	chr15	35598500	0.923077
chr1	17308300	0.630769	chr15	35601400	0.953846
chr1	17311500	0.661538	chr15	35654700	0.646154
chr1	17330600	0.676923	chr15	35719600	0.553846
chr1	17386300	0.830769	chr15	35732000	0.830769
chr1	17390200	0.923077	chr15	35736900	0.523077
chr1	17446000	0.538462	chr15	35747500	0.615385
chr1	17449300	0.815385	chr15	35757900	0.538462
chr1	17452500	0.938462	chr15	35814200	0.692308
chr1	17455100	0.984615	chr15	35825700	0.615385
chr1	17457200	0.538462	chr15	35833300	1
chr1	17493800	0.846154	chr15	35836700	0.538462
chr1	17497500	0.923077	chr15	35849900	0.938462
chr1	17513600	0.769231	chr15	35917300	0.8
chr1	17516600	0.984615	chr15	35919700	0.584615
chr1	17520400	0.676923	chr15	35959900	0.538462
chr1	17525500	0.6	chr15	35964200	0.507692
chr1	17534900	0.830769	chr15	35967300	0.923077
chr1	17539300	0.861538	chr15	35982900	0.707692
chr1	17560500	0.923077	chr15	35985900	0.830769
chr1	17563700	0.923077	chr15	35990100	0.969231
chr1	17566300	0.538462	chr15	35998200	0.830769
chr1	17578400	0.876923	chr15	36012600	0.6
chr1	17586000	0.676923	chr15	36017800	0.753846
chr1	17600800	0.553846	chr15	36021000	0.661538
chr1	17614200	0.738462	chr15	36030700	0.538462
chr1	17662800	0.6	chr15	36044100	0.815385
chr1	17732900	0.646154	chr15	36120500	0.553846
chr1	17750400	0.615385	chr15	36166600	0.676923
chr1	17767800	0.815385	chr15	36273000	0.538462
chr1	17770100	0.953846	chr15	36321900	0.538462
chr1	17821000	0.738462	chr15	36402900	0.753846
chr1	17829100	0.569231	chr15	36426100	0.8
chr1	17858900	0.615385	chr15	36429600	0.769231
chr1	17863000	0.553846	chr15	36449200	0.815385
chr1	17872200	0.876923	chr15	36468300	0.876923
chr1	17877900	0.523077	chr15	36470400	0.692308
chr1	17880800	0.969231	chr15	36477800	0.584615
chr1	17888100	0.753846	chr15	36501700	0.553846
chr1	17896400	0.953846	chr15	36523300	0.815385
chr1	17913000	0.923077	chr15	36557800	0.676923
chr1	17915900	0.507692	chr15	36623600	0.584615
chr1	17944900	0.815385	chr15	36626300	0.815385
chr1	17960100	0.6	chr15	36648500	0.769231
chr1	17988300	0.769231	chr15	36650600	0.984615
chr1	18023100	0.738462	chr15	36654700	0.8
chr1	18092300	0.861538	chr15	36663100	0.892308
chr1	18095400	0.907692	chr15	36681600	0.553846
chr1	18178400	0.553846	chr15	36700200	0.953846
chr1	18193200	1	chr15	36708000	0.615385
chr1	18196300	0.907692	chr15	36717300	0.538462
chr1	18199900	0.769231	chr15	36720600	1
chr1	18202300	0.984615	chr15	36724700	0.784615
chr1	18206400	0.861538	chr15	36731400	0.507692
chr1	18924100	0.615385	chr15	36758200	0.784615
chr1	19202100	0.6	chr15	36761200	0.938462
chr1	19249000	0.815385	chr15	36763800	0.507692
chr1	19253300	0.953846	chr15	36771700	0.861538
chr1	19256100	0.553846	chr15	36776400	0.923077
chr1	19268000	0.676923	chr15	36785100	0.553846
chr1	19272100	0.8	chr15	36790300	0.507692
chr1	19275700	0.661538	chr15	36793700	0.938462
chr1	19277800	0.523077	chr15	36883700	0.753846
chr1	19292300	0.738462	chr15	36891700	0.707692
chr1	19325900	0.569231	chr15	36894000	0.907692
chr1	19330100	0.830769	chr15	36904900	1
chr1	19333900	0.692308	chr15	36981300	0.584615
chr1	19336400	0.923077	chr15	37031200	0.969231
chr1	19339100	0.907692	chr15	37061400	0.861538
chr1	19360500	0.830769	chr15	37068100	0.553846
chr1	19394100	0.553846	chr15	37070800	0.938462
chr1	19408200	0.584615	chr15	37078200	0.692308
chr1	19414200	0.707692	chr15	37084900	0.923077
chr1	19418400	0.584615	chr15	37090800	0.892308
chr1	19489900	0.507692	chr15	37101100	0.507692
chr1	19496400	0.523077	chr15	37124000	1
chr1	19534100	0.630769	chr15	37126300	0.846154
chr1	19568000	0.676923	chr15	37137000	0.815385
chr1	19587400	0.938462	chr15	37176000	0.676923
chr1	19642100	0.615385	chr15	37204500	0.523077
chr1	19713000	0.569231	chr15	37229000	0.584615
chr1	19717700	0.553846	chr15	37244400	0.507692
chr1	19722600	0.569231	chr15	37312200	0.769231
chr1	19725100	0.953846	chr15	37321500	0.661538
chr1	19727900	0.861538	chr15	37323700	0.892308
chr1	19732700	0.646154	chr15	37327700	0.538462
chr1	19746100	0.630769	chr15	37330700	0.569231
chr1	19749700	0.569231	chr15	37339100	0.615385
chr1	19754000	0.892308	chr15	37345900	0.707692
chr1	19756800	0.923077	chr15	37351700	0.892308
chr1	19760000	0.507692	chr15	37369000	0.646154
chr1	19762900	0.538462	chr15	37372200	0.692308
chr1	19767300	0.753846	chr15	37386600	0.569231
chr1	19769700	0.569231	chr15	37408700	0.630769
chr1	19772500	0.523077	chr15	37426800	0.553846
chr1	19775300	0.569231	chr15	37429200	0.938462
chr1	19777700	0.615385	chr15	38057300	0.615385
chr1	19781000	0.507692	chr15	38065700	0.8
chr1	19783800	0.507692	chr15	38082100	0.738462
chr1	19792900	0.553846	chr15	38117100	0.984615
chr1	19796100	0.938462	chr15	38165400	0.553846
chr1	19803500	0.876923	chr15	38170100	0.938462
chr1	19814000	0.6	chr15	38172700	0.876923
chr1	19822900	0.907692	chr15	38184500	0.615385
chr1	19831700	0.923077	chr15	38193200	1
chr1	19835700	0.784615	chr15	38214100	0.538462
chr1	19839100	0.523077	chr15	38221700	0.538462
chr1	19841300	0.984615	chr15	38226300	0.953846
chr1	19886700	0.830769	chr15	38288400	0.630769
chr1	19890300	0.8	chr15	38322000	0.646154
chr1	19943400	0.6	chr15	38328300	0.584615
chr1	19967100	0.538462	chr15	38331200	0.907692
chr1	19980400	0.676923	chr15	38334000	0.923077
chr1	19986400	0.661538	chr15	38342600	0.523077
chr1	19988600	0.538462	chr15	38352000	0.938462
chr1	20009000	0.538462	chr15	38361600	0.569231
chr1	20031300	0.784615	chr15	38378200	0.938462
chr1	20042200	0.753846	chr15	38381600	0.584615
chr1	20062500	0.938462	chr15	38423300	0.846154
chr1	20085000	0.953846	chr15	38462600	0.615385
chr1	20088900	0.523077	chr15	38509400	0.923077
chr1	20092400	1	chr15	38519300	0.676923
chr1	20095900	0.523077	chr15	38556400	0.6
chr1	20127900	0.553846	chr15	38558800	0.507692
chr1	20187700	0.646154	chr15	38591500	0.569231
chr1	20190600	0.753846	chr15	38641500	0.661538
chr1	20196500	0.815385	chr15	38665500	0.676923
chr1	20390500	0.615385	chr15	38670600	0.815385
chr1	20396600	0.615385	chr15	38690500	0.984615
chr1	20429600	0.830769	chr15	38693700	0.615385
chr1	20522000	0.523077	chr15	38706800	0.784615
chr1	20539500	0.8	chr15	38753500	0.569231
chr1	20582400	0.646154	chr15	38764100	0.569231
chr1	20606300	0.553846	chr15	38766600	0.769231
chr1	20649900	0.846154	chr15	38770900	0.507692
chr1	20652700	0.630769	chr15	38779600	0.815385
chr1	20685500	0.584615	chr15	38782800	0.938462
chr1	20688600	0.630769	chr15	38809800	0.953846
chr1	20703600	0.753846	chr15	38828600	0.953846
chr1	20707200	0.984615	chr15	38832500	0.553846
chr1	20717400	0.523077	chr15	38841700	0.861538
chr1	20732900	0.876923	chr15	38848400	1
chr1	20737800	1	chr15	38851300	0.523077
chr1	20753600	1	chr15	38882000	0.523077
chr1	20756300	0.538462	chr15	38946300	0.523077
chr1	20799800	0.6	chr15	38988800	0.830769
chr1	20805500	0.907692	chr15	38993500	0.830769
chr1	20808000	0.892308	chr15	38998100	0.507692
chr1	20814300	0.507692	chr15	39000300	0.984615
chr1	20820400	1	chr15	39002400	0.661538
chr1	20822900	0.938462	chr15	39006600	0.984615
chr1	20849200	0.553846	chr15	39008700	0.553846
chr1	20902000	0.569231	chr15	39014100	0.938462
chr1	20916200	0.661538	chr15	39050500	0.830769
chr1	20928200	0.984615	chr15	39061600	0.6
chr1	20931000	0.984615	chr15	39088000	0.538462
chr1	20940500	0.984615	chr15	39110000	0.969231
chr1	20943000	0.876923	chr15	39112200	0.753846
chr1	21025300	0.569231	chr15	39120400	0.569231
chr1	21028000	0.523077	chr15	39134100	0.938462
chr1	21051800	0.707692	chr15	39136600	0.846154
chr1	21057100	0.523077	chr15	39138800	0.938462
chr1	21060700	0.738462	chr15	39141900	0.661538
chr1	21065900	0.938462	chr15	39146100	0.538462
chr1	21069600	0.615385	chr15	39153200	0.923077
chr1	21080300	0.553846	chr15	39157300	0.8
chr1	21118900	0.846154	chr15	39160800	0.969231
chr1	21163400	0.584615	chr15	39166300	0.569231
chr1	21174200	0.815385	chr15	39169500	0.723077
chr1	21194000	0.646154	chr15	39173100	0.769231
chr1	21199200	0.507692	chr15	39176500	0.707692
chr1	21211000	0.646154	chr15	39180200	0.907692
chr1	21217800	0.569231	chr15	39182300	0.6
chr1	21263300	0.815385	chr15	39186600	0.953846
chr1	21300800	0.969231	chr15	39191800	0.907692
chr1	21319500	0.676923	chr15	39204200	0.615385
chr1	21349000	0.907692	chr15	39223400	0.907692
chr1	21369600	0.6	chr15	39237500	0.553846
chr1	21376800	0.615385	chr15	39280900	0.523077
chr1	21385800	0.6	chr15	39284300	0.892308
chr1	21392200	0.523077	chr15	39288600	0.984615
chr1	21396200	0.630769	chr15	39309200	0.923077
chr1	21416800	0.569231	chr15	39311500	0.630769
chr1	21448900	0.892308	chr15	39321000	0.538462
chr1	21451500	0.923077	chr15	39323300	0.615385
chr1	21476600	0.876923	chr15	39356400	0.523077
chr1	21478800	0.661538	chr15	39359500	0.507692
chr1	21492300	0.569231	chr15	39362700	0.553846
chr1	21497500	0.507692	chr15	39367600	0.753846
chr1	21521800	0.784615	chr15	39371900	0.969231
chr1	21538900	0.6	chr15	39377600	0.815385
chr1	21565100	0.707692	chr15	39387600	0.723077
chr1	21578800	0.738462	chr15	39392400	0.923077
chr1	21587000	0.723077	chr15	39394700	0.676923
chr1	21589100	0.692308	chr15	39411000	0.784615
chr1	21591500	0.784615	chr15	39416400	0.8
chr1	21607700	0.676923	chr15	39420300	0.876923
chr1	21621500	0.507692	chr15	39423900	0.938462
chr1	21627000	0.615385	chr15	39426000	0.692308
chr1	21629400	0.861538	chr15	39428400	0.984615
chr1	21632700	0.553846	chr15	39432900	0.984615
chr1	21635400	0.523077	chr15	39437500	0.723077
chr1	21640800	0.769231	chr15	39442400	0.615385
chr1	21644100	0.892308	chr15	39446400	0.8
chr1	21646500	0.769231	chr15	39448900	0.615385
chr1	21649100	0.692308	chr15	39457500	0.846154
chr1	21651200	0.907692	chr15	39460100	0.569231
chr1	21653900	0.538462	chr15	39462200	0.507692
chr1	21661300	0.8	chr15	39464400	0.938462
chr1	21665400	0.923077	chr15	39466600	0.538462
chr1	21668300	0.569231	chr15	39469500	0.615385
chr1	21695100	0.553846	chr15	39472800	0.892308
chr1	21697400	0.753846	chr15	39476500	0.523077
chr1	21758500	0.523077	chr15	39481300	0.923077
chr1	21763800	0.615385	chr15	39484100	0.938462
chr1	21775600	0.815385	chr15	39486200	0.692308
chr1	21777900	0.923077	chr15	39488400	0.938462
chr1	21780800	0.923077	chr15	39491300	1
chr1	21792000	0.6	chr15	39495300	0.846154
chr1	21820000	0.784615	chr15	39498400	0.861538
chr1	21835700	0.6	chr15	39500600	0.661538
chr1	21838700	1	chr15	39505900	0.969231
chr1	21847700	0.569231	chr15	39508900	0.615385
chr1	21864400	0.507692	chr15	39512000	0.753846
chr1	21868900	0.523077	chr15	39522800	0.815385
chr1	21877100	0.723077	chr15	39525000	0.938462
chr1	21880400	0.984615	chr15	39527400	0.830769
chr1	21891600	0.646154	chr15	39532100	0.953846
chr1	21894400	0.907692	chr15	39536000	0.876923
chr1	21900900	0.630769	chr15	39538400	0.507692
chr1	21913700	0.907692	chr15	39540600	0.953846
chr1	22007700	0.661538	chr15	39544100	0.830769
chr1	22023700	0.738462	chr15	39553700	0.615385
chr1	22030400	0.584615	chr15	39563400	0.984615
chr1	22068100	0.815385	chr15	39566800	0.938462
chr1	22091500	0.876923	chr15	39571800	0.830769
chr1	22102700	0.723077	chr15	39575900	0.938462
chr1	22104800	0.507692	chr15	39579200	0.907692
chr1	22143800	0.553846	chr15	39582600	0.584615
chr1	22188800	0.969231	chr15	39589700	0.769231
chr1	22196700	0.661538	chr15	39594000	0.984615
chr1	22225700	0.523077	chr15	39596800	0.953846
chr1	22230300	0.615385	chr15	39603200	0.984615
chr1	22236500	0.784615	chr15	39609600	0.969231
chr1	22246400	0.661538	chr15	39614400	0.923077
chr1	22251300	0.553846	chr15	39618400	0.507692
chr1	22253500	0.861538	chr15	39624600	0.707692
chr1	22257900	0.984615	chr15	39627700	0.784615
chr1	22261500	0.6	chr15	39646000	0.707692
chr1	22266400	0.923077	chr15	39650500	0.815385
chr1	22269800	0.646154	chr15	39652700	0.723077
chr1	22283200	0.753846	chr15	39655400	0.984615
chr1	22288100	0.6	chr15	39684900	0.538462
chr1	22290700	0.953846	chr15	39695900	0.953846
chr1	22293000	0.630769	chr15	39699500	0.938462
chr1	22345800	0.923077	chr15	39707200	0.569231
chr1	22383100	0.507692	chr15	39719600	0.923077
chr1	22438400	0.584615	chr15	39722400	0.984615
chr1	22441300	0.723077	chr15	39727400	0.538462
chr1	22583900	0.523077	chr15	39743800	0.6
chr1	22586300	0.876923	chr15	39748100	0.692308
chr1	22602600	0.523077	chr15	39755100	0.830769
chr1	22668900	0.553846	chr15	39758700	0.784615
chr1	22740900	0.692308	chr15	39761400	0.784615
chr1	22745700	0.615385	chr15	39765200	0.876923
chr1	22774300	0.953846	chr15	39767400	0.753846
chr1	22827100	0.615385	chr15	39771500	0.723077
chr1	22830600	0.553846	chr15	39778900	0.830769
chr1	22968700	0.523077	chr15	39781100	0.769231
chr1	23000800	0.676923	chr15	39788500	0.8
chr1	23012400	0.630769	chr15	39791000	0.892308
chr1	23016100	0.984615	chr15	39793500	0.861538
chr1	23031100	0.861538	chr15	39797300	0.984615
chr1	23062000	0.907692	chr15	39803800	0.984615
chr1	23066500	0.953846	chr15	39823200	0.553846
chr1	23072600	0.769231	chr15	39846600	0.707692
chr1	23075000	0.584615	chr15	39848700	0.892308
chr1	23077100	0.969231	chr15	39851300	0.538462
chr1	23080700	0.646154	chr15	39866100	0.830769
chr1	23135500	0.861538	chr15	39870500	0.646154
chr1	23144300	0.523077	chr15	39890200	0.553846
chr1	23153500	0.676923	chr15	39892400	0.707692
chr1	23155800	0.523077	chr15	39910500	0.707692
chr1	23158800	0.938462	chr15	39917200	1
chr1	23188500	0.969231	chr15	39921200	0.784615
chr1	23197200	0.507692	chr15	39934500	0.830769
chr1	23212900	0.784615	chr15	39949900	0.738462
chr1	23215800	0.523077	chr15	39956200	0.692308
chr1	23229800	0.507692	chr15	39959100	0.846154
chr1	23246700	0.523077	chr15	39973400	0.753846
chr1	23257000	0.738462	chr15	39978500	0.784615
chr1	23290800	0.553846	chr15	40013400	0.646154
chr1	23296000	0.8	chr15	40039800	0.692308
chr1	23303300	0.707692	chr15	40064000	0.661538
chr1	23426700	0.738462	chr15	40069700	0.507692
chr1	23429200	0.923077	chr15	40076800	0.584615
chr1	23438600	0.523077	chr15	40079100	0.6
chr1	23441300	0.569231	chr15	40081500	0.861538
chr1	23449100	0.630769	chr15	40085100	0.769231
chr1	23453600	0.753846	chr15	40110500	0.507692
chr1	23511300	0.538462	chr15	40120800	0.553846
chr1	23515600	0.923077	chr15	40123100	0.676923
chr1	23521300	1	chr15	40125800	0.8
chr1	23524900	1	chr15	40138400	0.630769
chr1	23528800	0.569231	chr15	40144100	0.830769
chr1	23551800	0.861538	chr15	40146800	0.615385
chr1	23576700	0.507692	chr15	40152700	0.538462
chr1	23600200	0.846154	chr15	40161700	0.507692
chr1	23609900	0.846154	chr15	40164800	0.6
chr1	23697800	0.584615	chr15	40170100	0.969231
chr1	23704100	0.953846	chr15	40172300	0.646154
chr1	23711300	0.8	chr15	40174400	0.523077
chr1	23720700	0.876923	chr15	40180300	0.876923
chr1	23727300	0.615385	chr15	40189100	0.646154
chr1	23730600	0.953846	chr15	40200700	0.907692
chr1	23738300	0.953846	chr15	40210000	0.523077
chr1	23748500	0.876923	chr15	40217800	0.676923
chr1	23750700	0.523077	chr15	40225000	0.569231
chr1	23770900	0.523077	chr15	40228800	0.6
chr1	23797300	0.661538	chr15	40234700	0.615385
chr1	23802100	0.907692	chr15	40237200	0.569231
chr1	23823800	0.815385	chr15	40289300	0.646154
chr1	23864200	0.646154	chr15	40295200	0.661538
chr1	23866600	0.630769	chr15	40298700	0.830769
chr1	23871400	0.769231	chr15	40300900	0.507692
chr1	23875600	0.584615	chr15	40303100	0.8
chr1	23877900	0.523077	chr15	40308900	0.646154
chr1	23880200	0.676923	chr15	40337400	0.907692
chr1	23887900	0.8	chr15	40340000	0.969231
chr1	23891200	0.784615	chr15	40343500	0.507692
chr1	23894700	0.569231	chr15	40347400	0.723077
chr1	23896800	0.523077	chr15	40351100	0.953846
chr1	23904000	0.815385	chr15	40356500	0.846154
chr1	23907900	0.923077	chr15	40362000	0.569231
chr1	23912400	0.907692	chr15	40374000	0.8
chr1	23916300	0.738462	chr15	40376300	0.876923
chr1	23919200	0.769231	chr15	40381400	0.938462
chr1	23959600	0.692308	chr15	40384900	0.861538
chr1	23961700	0.553846	chr15	40388900	0.846154
chr1	23964100	0.692308	chr15	40391200	0.969231
chr1	23984300	0.569231	chr15	40393800	0.846154
chr1	24054100	0.953846	chr15	40395900	0.969231
chr1	24098800	0.538462	chr15	40399000	0.6
chr1	24116500	0.523077	chr15	40438500	0.753846
chr1	24257800	0.615385	chr15	40531400	0.553846
chr1	24278300	0.969231	chr15	40551100	0.538462
chr1	24281900	0.907692	chr15	40555600	0.538462
chr1	24311200	0.538462	chr15	40559300	0.953846
chr1	24325800	0.6	chr15	40579000	0.523077
chr1	24330100	0.646154	chr15	40602500	0.507692
chr1	24336000	0.876923	chr15	40607300	0.507692
chr1	24342400	0.676923	chr15	40620500	0.938462
chr1	24345500	0.984615	chr15	40623100	0.661538
chr1	24349500	0.969231	chr15	40626600	0.661538
chr1	24354800	0.6	chr15	40630600	0.646154
chr1	24373000	0.984615	chr15	40635900	0.984615
chr1	24397600	0.538462	chr15	40646900	0.784615
chr1	24435400	0.553846	chr15	40660400	0.753846
chr1	24477200	0.615385	chr15	40662900	0.6
chr1	24518700	0.6	chr15	40665400	0.707692
chr1	24526100	0.707692	chr15	40672200	1
chr1	24528800	0.538462	chr15	40714300	0.538462
chr1	24563300	0.646154	chr15	40737900	0.784615
chr1	24593200	1	chr15	40747400	0.615385
chr1	24610800	0.661538	chr15	40799300	0.538462
chr1	24616700	0.584615	chr15	40812200	0.630769
chr1	24621200	0.953846	chr15	40925800	0.723077
chr1	24628100	0.615385	chr15	40971500	0.553846
chr1	24648900	0.630769	chr15	41036600	0.646154
chr1	24656800	1	chr15	41059300	0.630769
chr1	24678700	0.553846	chr15	41080000	0.523077
chr1	24689700	0.907692	chr15	41086000	0.861538
chr1	24691900	0.892308	chr15	41118200	0.723077
chr1	24706700	0.569231	chr15	41127700	0.630769
chr1	24711100	0.923077	chr15	41150000	0.676923
chr1	24720500	0.538462	chr15	41184300	0.538462
chr1	24726900	0.646154	chr15	41196400	0.769231
chr1	24736300	0.953846	chr15	41198700	0.923077
chr1	24738700	0.630769	chr15	41218300	0.569231
chr1	24744700	0.907692	chr15	41229600	0.538462
chr1	24791000	0.646154	chr15	41232800	0.538462
chr1	24867800	0.892308	chr15	41259000	0.938462
chr1	24927400	0.6	chr15	41268900	0.661538
chr1	25010400	0.969231	chr15	41271300	0.630769
chr1	25015300	0.769231	chr15	41274300	0.661538
chr1	25021100	0.646154	chr15	41277500	0.830769
chr1	25029200	0.861538	chr15	41282200	0.723077
chr1	25032000	0.861538	chr15	41284700	0.830769
chr1	25034600	0.723077	chr15	41287900	0.707692
chr1	25040000	0.830769	chr15	41291700	0.984615
chr1	25042400	0.523077	chr15	41294000	0.723077
chr1	25046800	0.923077	chr15	41297700	0.538462
chr1	25051600	0.953846	chr15	41303600	0.907692
chr1	25054200	0.984615	chr15	41306200	0.938462
chr1	25057700	0.753846	chr15	41309800	0.876923
chr1	25062500	0.892308	chr15	41312700	0.553846
chr1	25066700	0.523077	chr15	41314800	0.646154
chr1	25069000	1	chr15	41317300	0.569231
chr1	25079500	0.615385	chr15	41335700	0.815385
chr1	25089000	0.646154	chr15	41443200	0.723077
chr1	25096000	0.753846	chr15	41454000	0.938462
chr1	25098100	0.738462	chr15	41472700	0.538462
chr1	25117400	0.523077	chr15	41475900	1
chr1	25120400	0.830769	chr15	41542200	0.815385
chr1	25132400	0.507692	chr15	41573900	0.753846
chr1	25154700	0.723077	chr15	41727800	0.538462
chr1	25174600	0.523077	chr15	41769700	1
chr1	25237800	0.723077	chr15	41780300	0.661538
chr1	25240300	0.538462	chr15	41782800	0.984615
chr1	25258900	0.769231	chr15	41839700	0.676923
chr1	25264500	0.615385	chr15	41850000	0.630769
chr1	25273700	0.8	chr15	41854200	0.538462
chr1	25276000	0.953846	chr15	41856700	0.507692
chr1	25278700	0.953846	chr15	41860900	0.938462
chr1	25281900	0.923077	chr15	41896600	0.584615
chr1	25290000	0.6	chr15	41899500	0.892308
chr1	25293500	0.923077	chr15	41941400	0.6
chr1	25297000	0.892308	chr15	41948200	0.553846
chr1	25299100	0.892308	chr15	41958900	0.738462
chr1	25330200	0.553846	chr15	42026300	0.507692
chr1	25344200	0.815385	chr15	42065000	0.630769
chr1	25349200	0.861538	chr15	42069000	0.615385
chr1	25353400	0.569231	chr15	42072800	0.876923
chr1	25358600	0.507692	chr15	42083400	0.953846
chr1	25364500	0.523077	chr15	42089000	0.646154
chr1	25428200	0.784615	chr15	42094400	0.615385
chr1	25509400	0.769231	chr15	42163300	0.676923
chr1	25566600	0.707692	chr15	42187300	0.553846
chr1	25580700	0.907692	chr15	42196900	0.646154
chr1	25584000	0.753846	chr15	42210200	0.692308
chr1	25586600	0.523077	chr15	42212700	0.861538
chr1	25646900	0.938462	chr15	42219000	0.584615
chr1	25651000	0.523077	chr15	42223000	0.953846
chr1	25656800	0.646154	chr15	42226100	0.615385
chr1	25670000	0.753846	chr15	42229000	0.523077
chr1	25683300	0.507692	chr15	42232900	0.923077
chr1	25687800	0.846154	chr15	42236700	0.938462
chr1	25698400	0.969231	chr15	42239800	0.584615
chr1	25709700	0.523077	chr15	42242800	0.615385
chr1	25795700	0.6	chr15	42258500	0.569231
chr1	25827900	0.953846	chr15	42282000	0.569231
chr1	25830000	0.753846	chr15	42349500	0.507692
chr1	25832100	0.8	chr15	42450900	0.692308
chr1	25846400	0.676923	chr15	42532000	0.553846
chr1	25850200	0.676923	chr15	42567900	0.6
chr1	25877400	0.646154	chr15	42578700	0.923077
chr1	25893600	0.815385	chr15	42613600	0.538462
chr1	25895700	0.892308	chr15	42616700	0.907692
chr1	25901000	0.538462	chr15	42624500	0.569231
chr1	25917100	0.938462	chr15	42637200	0.753846
chr1	25935300	0.830769	chr15	42640500	0.830769
chr1	25937800	0.692308	chr15	42668500	0.523077
chr1	25968700	0.876923	chr15	42678200	0.538462
chr1	25987900	0.553846	chr15	42720000	0.923077
chr1	25999800	0.646154	chr15	42749800	0.615385
chr1	26003400	0.553846	chr15	42784700	0.738462
chr1	26010200	0.784615	chr15	42791700	0.646154
chr1	26015000	0.923077	chr15	42800100	0.523077
chr1	26021700	1	chr15	42803500	0.646154
chr1	26024300	0.738462	chr15	42876500	0.569231
chr1	26026800	0.861538	chr15	42887900	0.553846
chr1	26029100	0.953846	chr15	42943000	0.738462
chr1	26033800	0.907692	chr15	42964100	0.569231
chr1	26036200	0.753846	chr15	42996800	0.8
chr1	26038300	0.969231	chr15	43008700	0.507692
chr1	26041800	0.738462	chr15	43125000	0.846154
chr1	26054300	0.538462	chr15	43182900	0.876923
chr1	26070700	0.523077	chr15	43219100	0.784615
chr1	26107200	0.538462	chr15	43249200	0.553846
chr1	26113700	0.569231	chr15	43286900	0.692308
chr1	26123600	0.830769	chr15	43378800	0.923077
chr1	26217000	0.923077	chr15	43385500	0.876923
chr1	26219500	0.923077	chr15	43388200	0.738462
chr1	26222200	0.861538	chr15	43442800	0.784615
chr1	26239100	0.830769	chr15	43460700	0.507692
chr1	26249400	0.507692	chr15	43487500	0.507692
chr1	26279700	0.969231	chr15	43542100	0.907692
chr1	26285100	1	chr15	43585000	0.738462
chr1	26319100	0.615385	chr15	43675500	0.615385
chr1	26344400	0.784615	chr15	43733300	0.938462
chr1	26347000	0.876923	chr15	43757700	0.907692
chr1	26421500	0.538462	chr15	43798100	0.969231
chr1	26431800	0.738462	chr15	43801500	0.615385
chr1	26564100	0.630769	chr15	43806300	0.876923
chr1	26602800	0.907692	chr15	44055300	0.784615
chr1	26605100	0.892308	chr15	44105600	0.507692
chr1	26608700	0.523077	chr15	44114200	0.646154
chr1	26611600	0.692308	chr15	44196200	0.553846
chr1	26625000	0.784615	chr15	44203600	0.984615
chr1	26629800	0.969231	chr15	44205700	1
chr1	26647700	0.676923	chr15	44208100	0.538462
chr1	26677700	0.553846	chr15	44214600	0.984615
chr1	26701500	0.8	chr15	44251400	0.969231
chr1	26704600	0.953846	chr15	44292400	0.646154
chr1	26712300	0.553846	chr15	44301500	0.569231
chr1	26731900	0.615385	chr15	44319000	0.707692
chr1	26735400	0.538462	chr15	44322400	0.907692
chr1	26743700	0.769231	chr15	44327900	0.584615
chr1	26810200	0.553846	chr15	44331300	0.538462
chr1	26868600	0.630769	chr15	44358500	0.553846
chr1	26909500	0.861538	chr15	44373800	0.969231
chr1	26945300	0.569231	chr15	44380300	0.938462
chr1	26994700	0.553846	chr15	44392100	0.630769
chr1	27004200	0.6	chr15	44395100	0.984615
chr1	27009400	0.507692	chr15	44445600	0.692308
chr1	27012100	0.8	chr15	44448000	0.569231
chr1	27027100	0.707692	chr15	44450200	0.938462
chr1	27029800	0.769231	chr15	44500300	0.815385
chr1	27032500	0.846154	chr15	44508000	0.738462
chr1	27050400	0.923077	chr15	44512000	0.646154
chr1	27057400	0.8	chr15	44589300	0.676923
chr1	27060600	0.692308	chr15	44632900	0.584615
chr1	27070800	0.892308	chr15	44663800	0.569231
chr1	27095300	0.769231	chr15	44673500	0.584615
chr1	27098300	1	chr15	44677500	0.938462
chr1	27101900	0.507692	chr15	44728500	0.569231
chr1	27110700	0.846154	chr15	44781900	0.876923
chr1	27113100	0.507692	chr15	44834100	0.938462
chr1	27126400	0.661538	chr15	44838600	0.523077
chr1	27136700	0.569231	chr15	44989600	0.507692
chr1	27151900	0.630769	chr15	45019100	0.938462
chr1	27176000	0.523077	chr15	45027900	0.769231
chr1	27179800	0.692308	chr15	45121000	0.738462
chr1	27188000	0.523077	chr15	45329500	0.661538
chr1	27234300	0.723077	chr15	45353700	0.630769
chr1	27288600	0.984615	chr15	45364100	0.661538
chr1	27290800	0.615385	chr15	45383600	0.923077
chr1	27293700	0.969231	chr15	45410400	0.738462
chr1	27299100	0.646154	chr15	45414500	0.938462
chr1	27318100	0.984615	chr15	45455300	0.876923
chr1	27326100	1	chr15	45547200	0.569231
chr1	27328300	0.615385	chr15	45722800	0.523077
chr1	27331300	0.707692	chr15	45735100	0.630769
chr1	27335100	0.523077	chr15	45737900	0.8
chr1	27337700	0.969231	chr15	45740900	0.723077
chr1	27348300	0.707692	chr15	45747300	1
chr1	27353900	0.753846	chr15	45749900	0.661538
chr1	27358200	0.753846	chr15	45886800	0.846154
chr1	27371400	0.553846	chr15	45923700	0.969231
chr1	27424300	0.615385	chr15	45929900	0.938462
chr1	27426500	0.723077	chr15	45933800	0.815385
chr1	27438800	0.969231	chr15	45936300	0.523077
chr1	27443300	0.538462	chr15	45938400	0.892308
chr1	27445700	0.861538	chr15	45941300	0.861538
chr1	27449400	0.923077	chr15	45962700	0.646154
chr1	27472700	0.907692	chr15	46006900	0.723077
chr1	27519300	0.507692	chr15	46419900	0.923077
chr1	27524600	0.646154	chr15	46422500	0.538462
chr1	27623500	0.784615	chr15	46604600	0.538462
chr1	27626200	0.892308	chr15	47488400	0.892308
chr1	27668400	0.6	chr15	47586300	0.923077
chr1	27722100	0.569231	chr15	47624200	0.953846
chr1	27745200	0.907692	chr15	47626400	0.538462
chr1	27755400	0.523077	chr15	47648100	0.876923
chr1	27763300	0.6	chr15	47659200	0.507692
chr1	27818700	0.615385	chr15	47666700	0.861538
chr1	27831300	0.646154	chr15	47676800	1
chr1	27840900	0.538462	chr15	47691500	0.507692
chr1	27849800	0.584615	chr15	47701600	0.538462
chr1	27852300	0.707692	chr15	47704400	0.876923
chr1	27855800	0.723077	chr15	47708100	1
chr1	27863700	0.784615	chr15	47715300	0.692308
chr1	27867000	0.969231	chr15	47719900	0.507692
chr1	27869100	0.738462	chr15	47723800	0.969231
chr1	27871500	0.553846	chr15	47727400	1
chr1	27884000	0.661538	chr15	47729500	0.569231
chr1	27887500	0.553846	chr15	47731600	0.876923
chr1	27890900	0.8	chr15	47736100	0.984615
chr1	27895000	0.692308	chr15	47754000	0.938462
chr1	27899200	0.523077	chr15	47756100	0.507692
chr1	27902200	0.892308	chr15	47758900	0.907692
chr1	27915600	0.615385	chr15	47763800	0.969231
chr1	27921500	0.569231	chr15	47777500	0.553846
chr1	27925800	0.738462	chr15	47798900	0.723077
chr1	27935300	0.723077	chr15	47806800	0.907692
chr1	27970600	0.784615	chr15	47809300	0.538462
chr1	27977600	0.661538	chr15	47816200	0.907692
chr1	27982700	0.646154	chr15	47867400	0.584615
chr1	27986600	0.584615	chr15	47869500	0.523077
chr1	27989900	0.553846	chr15	47955600	0.676923
chr1	28079100	0.846154	chr15	47958500	0.923077
chr1	28122200	0.507692	chr15	47977500	0.553846
chr1	28144000	0.692308	chr15	47981200	0.923077
chr1	28148700	0.507692	chr15	48008200	0.615385
chr1	28184900	0.738462	chr15	48013200	0.615385
chr1	28190000	0.953846	chr15	48028700	0.615385
chr1	28202000	0.923077	chr15	48042900	0.984615
chr1	28295400	0.892308	chr15	48049200	0.784615
chr1	28306600	0.661538	chr15	48112500	0.661538
chr1	28355800	0.953846	chr15	48355000	0.938462
chr1	28358800	0.523077	chr15	48389200	0.815385
chr1	28392600	0.784615	chr15	48436900	0.738462
chr1	28402700	0.615385	chr15	48442200	0.846154
chr1	28426200	0.784615	chr15	48578100	0.938462
chr1	28431800	0.723077	chr15	48647700	0.646154
chr1	28439400	0.830769	chr15	48650600	0.938462
chr1	28449900	0.969231	chr15	48666400	0.646154
chr1	28455900	0.553846	chr15	48677700	0.723077
chr1	28463200	0.630769	chr15	48680900	0.907692
chr1	28466100	0.6	chr15	48687900	0.938462
chr1	28474300	0.692308	chr15	48692600	0.738462
chr1	28479800	0.984615	chr15	48705800	0.661538
chr1	28483000	0.907692	chr15	48708600	0.584615
chr1	28487700	0.953846	chr15	48717500	0.553846
chr1	28490500	0.846154	chr15	48720500	0.892308
chr1	28499600	0.707692	chr15	48732400	0.938462
chr1	28503300	0.707692	chr15	48739900	0.738462
chr1	28517000	0.953846	chr15	48742200	0.892308
chr1	28575300	0.846154	chr15	48752100	0.784615
chr1	28585000	0.584615	chr15	48755100	0.846154
chr1	28633100	0.523077	chr15	48762700	0.538462
chr1	28640700	0.8	chr15	48765200	0.661538
chr1	28670200	0.507692	chr15	48768500	0.569231
chr1	28672900	0.892308	chr15	48774400	0.907692
chr1	28678600	0.538462	chr15	48783500	0.584615
chr1	28680900	0.953846	chr15	48785900	0.938462
chr1	28700900	0.707692	chr15	48788000	0.569231
chr1	28718800	0.538462	chr15	48793500	0.523077
chr1	28764500	0.553846	chr15	48819800	0.753846
chr1	28782800	0.707692	chr15	48829600	0.676923
chr1	28785200	0.646154	chr15	48834500	0.615385
chr1	28928400	0.984615	chr15	48840100	0.876923
chr1	28973000	0.815385	chr15	48847000	0.923077
chr1	29002400	0.830769	chr15	48851600	1
chr1	29045500	0.676923	chr15	48856800	0.553846
chr1	29078000	0.969231	chr15	48858900	0.861538
chr1	29082400	0.861538	chr15	48872300	0.553846
chr1	29112000	0.507692	chr15	48875000	0.830769
chr1	29152900	0.953846	chr15	48884800	0.753846
chr1	29203900	0.8	chr15	48895100	0.923077
chr1	29208800	0.907692	chr15	48897200	0.646154
chr1	29211700	0.984615	chr15	48902400	0.507692
chr1	29254200	0.630769	chr15	48906900	0.676923
chr1	29299200	0.923077	chr15	48910100	0.984615
chr1	29472700	0.861538	chr15	48919600	0.723077
chr1	29512900	0.507692	chr15	48923100	0.538462
chr1	29523600	0.969231	chr15	48925300	0.676923
chr1	29529500	1	chr15	48927900	0.507692
chr1	29535800	0.753846	chr15	48960300	0.892308
chr1	29570500	0.984615	chr15	48964000	0.815385
chr1	29575900	0.753846	chr15	48967500	0.907692
chr1	29583800	0.661538	chr15	48973400	0.969231
chr1	29591700	0.523077	chr15	48987600	0.938462
chr1	29598400	0.923077	chr15	48995800	0.553846
chr1	29607000	0.8	chr15	49011200	0.615385
chr1	30028100	0.538462	chr15	49013500	0.738462
chr1	30043200	0.984615	chr15	49015700	1
chr1	30052900	0.723077	chr15	49041000	0.523077
chr1	30104300	0.738462	chr15	49044200	0.738462
chr1	30113500	0.738462	chr15	49046600	0.6
chr1	30155800	0.6	chr15	49065700	0.630769
chr1	30159100	0.615385	chr15	49086800	0.507692
chr1	30161500	0.984615	chr15	49089600	0.784615
chr1	30171000	0.753846	chr15	49148200	0.784615
chr1	30180300	0.692308	chr15	49150900	0.892308
chr1	30182600	0.938462	chr15	49154400	0.892308
chr1	30185200	0.830769	chr15	49158600	0.938462
chr1	30266100	0.553846	chr15	49160900	0.923077
chr1	30447300	0.692308	chr15	49168600	0.661538
chr1	30532000	0.661538	chr15	49178100	0.6
chr1	30556900	1	chr15	49181800	0.953846
chr1	30559000	0.876923	chr15	49189600	0.769231
chr1	30853300	0.538462	chr15	49218300	1
chr1	31174000	0.892308	chr15	49221800	0.523077
chr1	31181100	0.507692	chr15	49229200	0.953846
chr1	31221500	0.738462	chr15	49232100	0.984615
chr1	31229800	0.538462	chr15	49238400	0.923077
chr1	31236700	0.6	chr15	49253100	0.553846
chr1	31255600	0.553846	chr15	49257300	0.538462
chr1	31270500	0.584615	chr15	49259700	0.969231
chr1	31274800	0.969231	chr15	49263300	0.907692
chr1	31278400	0.830769	chr15	49268200	0.507692
chr1	31284400	0.846154	chr15	49270600	0.523077
chr1	31289300	0.984615	chr15	49329100	0.538462
chr1	31291700	0.846154	chr15	49353100	0.907692
chr1	31295900	0.784615	chr15	49375500	0.923077
chr1	31298200	0.507692	chr15	49378500	0.907692
chr1	31320700	0.630769	chr15	49393900	0.523077
chr1	31327300	0.569231	chr15	49428300	0.876923
chr1	31331800	0.861538	chr15	49430700	0.523077
chr1	31350600	0.938462	chr15	49438400	0.523077
chr1	31361500	0.938462	chr15	49480000	0.953846
chr1	31368900	0.553846	chr15	49528100	0.830769
chr1	31375100	0.523077	chr15	49531000	0.830769
chr1	31384600	0.661538	chr15	49535200	0.984615
chr1	31391900	0.661538	chr15	49540000	0.953846
chr1	31402600	0.707692	chr15	49548400	0.923077
chr1	31407100	0.584615	chr15	49561200	0.569231
chr1	31428800	0.553846	chr15	49563500	0.892308
chr1	31439700	0.815385	chr15	49566000	0.815385
chr1	31456000	0.523077	chr15	49572400	0.538462
chr1	31461200	0.584615	chr15	49574800	1
chr1	31463800	0.523077	chr15	49579000	0.753846
chr1	31476700	0.507692	chr15	49606100	0.507692
chr1	31480600	0.692308	chr15	49675900	0.830769
chr1	31483600	0.553846	chr15	49702200	0.507692
chr1	31511700	0.738462	chr15	49707900	0.984615
chr1	31568600	0.630769	chr15	49714100	0.615385
chr1	31575500	0.692308	chr15	49720100	0.523077
chr1	31625500	0.692308	chr15	49722600	0.676923
chr1	31635700	0.892308	chr15	49726300	0.646154
chr1	31643800	0.953846	chr15	49731600	0.876923
chr1	31655400	0.569231	chr15	49733700	0.523077
chr1	31658800	0.507692	chr15	49745200	0.523077
chr1	31779400	0.892308	chr15	49751700	0.584615
chr1	31849900	0.830769	chr15	49759000	0.538462
chr1	31857600	0.553846	chr15	49764400	0.507692
chr1	31867700	0.784615	chr15	49783000	0.507692
chr1	31869900	0.984615	chr15	49785100	0.938462
chr1	31873300	0.815385	chr15	49788800	0.969231
chr1	31875500	0.615385	chr15	49799700	0.553846
chr1	31879300	0.553846	chr15	49814100	0.523077
chr1	31882800	0.907692	chr15	49915600	0.523077
chr1	31885100	0.507692	chr15	49920100	0.923077
chr1	31895100	0.584615	chr15	49938200	0.707692
chr1	31956200	0.738462	chr15	49967400	0.876923
chr1	31971800	0.630769	chr15	49985900	0.815385
chr1	31997000	0.830769	chr15	49989800	0.646154
chr1	32014700	0.630769	chr15	50010600	0.846154
chr1	32029800	0.661538	chr15	50063900	0.584615
chr1	32034400	0.523077	chr15	50103100	0.538462
chr1	32039700	0.984615	chr15	50108200	0.861538
chr1	32042500	0.676923	chr15	50116700	0.553846
chr1	32046000	0.830769	chr15	50124200	0.953846
chr1	32049900	0.523077	chr15	50137100	0.569231
chr1	32059800	0.630769	chr15	50140600	0.984615
chr1	32105300	0.830769	chr15	50145100	0.815385
chr1	32112700	0.676923	chr15	50148400	0.923077
chr1	32132300	0.661538	chr15	50152500	0.938462
chr1	32135800	0.584615	chr15	50156200	1
chr1	32154000	0.923077	chr15	50164200	0.507692
chr1	32159900	0.553846	chr15	50168300	0.569231
chr1	32166900	0.830769	chr15	50170600	0.815385
chr1	32171100	0.923077	chr15	50188300	0.523077
chr1	32174100	0.815385	chr15	50192800	0.861538
chr1	32178500	0.953846	chr15	50195700	0.676923
chr1	32180900	0.553846	chr15	50199400	0.569231
chr1	32212600	0.6	chr15	50219800	0.523077
chr1	32216500	0.507692	chr15	50272000	0.6
chr1	32219800	0.6	chr15	50275000	0.923077
chr1	32261800	0.523077	chr15	50279900	0.907692
chr1	32265600	0.523077	chr15	50283600	0.969231
chr1	32277500	0.923077	chr15	50286100	0.846154
chr1	32281600	0.569231	chr15	50293300	0.507692
chr1	32309300	0.676923	chr15	50296100	0.984615
chr1	32321200	0.753846	chr15	50308400	0.538462
chr1	32397700	0.584615	chr15	50316700	0.661538
chr1	32400700	0.6	chr15	50342200	1
chr1	32405700	0.646154	chr15	50347700	0.923077
chr1	32410200	0.784615	chr15	50350600	0.876923
chr1	32414100	0.815385	chr15	50412000	0.569231
chr1	32417200	0.815385	chr15	50420000	0.907692
chr1	32420600	0.769231	chr15	50427100	1
chr1	32423000	0.676923	chr15	50429700	0.953846
chr1	32428000	0.707692	chr15	50433000	0.538462
chr1	32443300	0.6	chr15	50437700	0.923077
chr1	32497700	0.723077	chr15	50456300	0.646154
chr1	32528300	0.846154	chr15	50458600	0.876923
chr1	32534500	0.523077	chr15	50519500	0.876923
chr1	32537200	0.523077	chr15	50548900	1
chr1	32567000	0.938462	chr15	50614100	0.615385
chr1	32582000	0.830769	chr15	50743600	0.692308
chr1	32599300	0.969231	chr15	50835500	0.769231
chr1	32604700	0.630769	chr15	50920100	0.661538
chr1	32608400	0.507692	chr15	50969400	0.6
chr1	32616800	0.615385	chr15	50989700	0.861538
chr1	32702000	0.984615	chr15	51039400	0.738462
chr1	32708400	0.523077	chr15	51045800	0.8
chr1	32712800	0.769231	chr15	51066200	0.553846
chr1	32733100	0.892308	chr15	51121200	0.784615
chr1	32739200	0.876923	chr15	51169400	0.784615
chr1	32805200	0.507692	chr15	51173100	0.923077
chr1	32815100	0.6	chr15	51177600	0.892308
chr1	32819700	0.876923	chr15	51202900	0.892308
chr1	32827600	0.507692	chr15	51232400	0.553846
chr1	32836700	0.538462	chr15	51289300	0.538462
chr1	32864100	0.692308	chr15	51323000	0.984615
chr1	32866800	0.738462	chr15	51339500	0.661538
chr1	32870800	0.861538	chr15	51359700	0.938462
chr1	32879700	0.615385	chr15	51376200	0.830769
chr1	32960500	0.523077	chr15	51378600	0.538462
chr1	33161200	0.6	chr15	51390500	0.753846
chr1	33170500	0.784615	chr15	51396900	0.830769
chr1	33172700	0.6	chr15	51401700	0.938462
chr1	33177800	0.507692	chr15	51413600	0.923077
chr1	33182500	0.615385	chr15	51425200	0.984615
chr1	33190900	0.969231	chr15	51455500	0.553846
chr1	33195600	0.615385	chr15	51464800	0.538462
chr1	33227200	0.6	chr15	51516400	0.569231
chr1	33233200	0.630769	chr15	51520900	0.984615
chr1	33255000	0.723077	chr15	51573800	0.8
chr1	33264000	0.630769	chr15	51602400	0.507692
chr1	33267100	0.661538	chr15	51604900	0.676923
chr1	33338500	0.507692	chr15	51659100	0.584615
chr1	33342500	0.507692	chr15	51661200	0.984615
chr1	33385700	0.584615	chr15	51669400	0.969231
chr1	33399300	0.707692	chr15	51673600	0.830769
chr1	33405600	0.8	chr15	51695500	0.569231
chr1	33419500	0.6	chr15	51698500	0.6
chr1	33434100	0.861538	chr15	51786300	0.953846
chr1	33447100	0.846154	chr15	51788900	0.507692
chr1	33450300	0.938462	chr15	52018700	0.984615
chr1	33455100	0.984615	chr15	52024200	0.923077
chr1	33458100	0.938462	chr15	52051900	0.923077
chr1	33463800	0.523077	chr15	52130500	0.553846
chr1	33473000	0.938462	chr15	52135300	0.692308
chr1	33498000	0.723077	chr15	52138800	0.861538
chr1	33516100	0.830769	chr15	52146200	0.646154
chr1	33552000	0.523077	chr15	52149400	0.553846
chr1	33558000	0.584615	chr15	52161100	0.553846
chr1	33561900	0.876923	chr15	52167600	0.861538
chr1	33565200	0.938462	chr15	52171200	0.876923
chr1	33567600	0.738462	chr15	52176800	0.846154
chr1	33586200	0.553846	chr15	52274600	0.707692
chr1	33603800	0.661538	chr15	52298900	0.676923
chr1	33606000	0.676923	chr15	52303400	0.753846
chr1	33609600	0.984615	chr15	52305600	0.938462
chr1	33619000	0.538462	chr15	52310300	0.507692
chr1	33627100	0.692308	chr15	52333000	0.553846
chr1	33629500	0.969231	chr15	52345200	0.538462
chr1	33634400	0.569231	chr15	52369200	0.984615
chr1	33636900	0.553846	chr15	52385900	0.907692
chr1	33642400	0.584615	chr15	52388000	1
chr1	33686900	0.569231	chr15	52393300	0.953846
chr1	33694900	0.661538	chr15	52395900	0.953846
chr1	33766600	0.953846	chr15	52417000	0.892308
chr1	33782200	0.923077	chr15	52428800	0.692308
chr1	33784900	0.523077	chr15	52432200	0.953846
chr1	33793900	0.523077	chr15	52436500	0.923077
chr1	33798400	0.523077	chr15	52440800	0.523077
chr1	33802100	0.538462	chr15	52454600	0.969231
chr1	33804400	0.523077	chr15	52500800	0.646154
chr1	33808200	0.876923	chr15	52513200	0.6
chr1	33812600	0.569231	chr15	52519900	0.815385
chr1	33829800	0.953846	chr15	52526200	0.569231
chr1	33833400	0.692308	chr15	52539500	0.507692
chr1	33836200	0.615385	chr15	52543300	0.969231
chr1	33840300	0.923077	chr15	52545400	0.923077
chr1	33843500	0.538462	chr15	52547500	0.753846
chr1	33850200	0.969231	chr15	52554300	1
chr1	33853500	0.938462	chr15	52580900	0.707692
chr1	33856500	0.984615	chr15	52626900	0.969231
chr1	33858700	0.8	chr15	52630000	0.523077
chr1	33887200	0.646154	chr15	52641300	0.646154
chr1	33890300	0.538462	chr15	52774300	0.815385
chr1	33899500	1	chr15	52789100	0.507692
chr1	33905600	0.523077	chr15	52812900	0.615385
chr1	33908900	0.769231	chr15	52815700	0.784615
chr1	33913400	0.553846	chr15	52850600	0.830769
chr1	33921500	0.738462	chr15	52857500	0.507692
chr1	33924400	0.923077	chr15	52935400	0.692308
chr1	33934200	0.661538	chr15	52945400	0.876923
chr1	33936300	0.969231	chr15	53073000	0.676923
chr1	34078800	0.630769	chr15	55510100	0.907692
chr1	35253500	0.692308	chr15	55513700	0.815385
chr1	35272200	0.584615	chr15	55542700	0.876923
chr1	35452700	0.523077	chr15	55546100	0.953846
chr1	35513300	0.953846	chr15	55559900	0.707692
chr1	35577000	0.553846	chr15	55569400	0.538462
chr1	35688700	0.953846	chr15	55572100	0.876923
chr1	35753800	0.615385	chr15	55574800	0.723077
chr1	35836100	0.538462	chr15	55627400	0.630769
chr1	35843500	0.538462	chr15	55650300	0.523077
chr1	35914100	0.769231	chr15	55781500	0.692308
chr1	35917900	0.784615	chr15	55845400	0.569231
chr1	35920300	0.846154	chr15	55920200	0.676923
chr1	36005700	0.815385	chr15	55941000	0.692308
chr1	36192600	0.646154	chr15	55988500	0.523077
chr1	36240500	0.723077	chr15	56072400	0.6
chr1	36342800	0.646154	chr15	56084400	0.876923
chr1	36391600	0.6	chr15	56092000	0.553846
chr1	36574700	0.661538	chr15	56115800	0.615385
chr1	36581100	0.615385	chr15	56138500	0.569231
chr1	36585100	0.830769	chr15	56149400	0.523077
chr1	36593000	0.523077	chr15	56159700	0.646154
chr1	36599400	0.723077	chr15	56165100	0.615385
chr1	36602400	0.969231	chr15	56187200	0.6
chr1	36616700	0.892308	chr15	56190400	0.907692
chr1	36620100	0.615385	chr15	56195500	0.753846
chr1	36638100	0.553846	chr15	56200200	0.969231
chr1	36653900	0.738462	chr15	56202300	0.815385
chr1	36669600	0.876923	chr15	56204900	0.615385
chr1	36688500	0.523077	chr15	56210300	0.769231
chr1	36705500	0.538462	chr15	56330600	0.569231
chr1	36710300	0.815385	chr15	56332900	1
chr1	36714100	0.723077	chr15	56335000	0.507692
chr1	36786800	0.815385	chr15	56342600	0.907692
chr1	36790200	0.553846	chr15	56452600	0.553846
chr1	36793300	0.938462	chr15	56454800	0.630769
chr1	36808600	0.769231	chr15	56497600	0.6
chr1	36815400	0.723077	chr15	56500000	0.507692
chr1	36818800	0.846154	chr15	56538400	0.584615
chr1	36821500	0.507692	chr15	56783700	0.553846
chr1	36831900	0.507692	chr15	56788900	0.723077
chr1	36834900	0.553846	chr15	56817500	0.6
chr1	36838300	0.692308	chr15	56880000	0.984615
chr1	36840400	0.938462	chr15	56891900	0.6
chr1	36853600	0.692308	chr15	56922100	0.630769
chr1	36874400	0.815385	chr15	56932900	0.646154
chr1	36886600	0.861538	chr15	57029600	0.815385
chr1	36931900	0.538462	chr15	57037900	0.723077
chr1	36963000	0.538462	chr15	57051300	0.923077
chr1	36982200	0.523077	chr15	57057500	0.830769
chr1	37920500	0.876923	chr15	57065600	0.923077
chr1	37930900	0.723077	chr15	57087000	0.507692
chr1	37937400	0.969231	chr15	57098200	0.846154
chr1	37945400	0.953846	chr15	57109600	0.523077
chr1	37953000	0.584615	chr15	57114100	0.861538
chr1	38000100	0.907692	chr15	57124800	0.6
chr1	38003000	0.615385	chr15	57129600	0.953846
chr1	38040900	0.923077	chr15	57163600	0.861538
chr1	38069000	0.553846	chr15	57222000	0.507692
chr1	38411300	0.507692	chr15	57231700	0.753846
chr1	38424600	0.815385	chr15	57241300	0.507692
chr1	38461800	0.676923	chr15	57271600	0.569231
chr1	38466200	0.846154	chr15	57277300	0.523077
chr1	38475200	0.507692	chr15	57295900	0.938462
chr1	38481900	0.507692	chr15	57318100	0.553846
chr1	38486200	0.553846	chr15	57341300	0.507692
chr1	38496300	0.523077	chr15	57346500	0.569231
chr1	38529900	0.507692	chr15	57349800	0.507692
chr1	38604400	0.738462	chr15	57353300	0.892308
chr1	39201500	0.523077	chr15	57356900	0.553846
chr1	39427800	0.707692	chr15	57359800	0.538462
chr1	39452500	0.907692	chr15	57387200	0.676923
chr1	39513800	0.584615	chr15	57438900	0.692308
chr1	39552700	0.676923	chr15	57442900	0.938462
chr1	39558300	0.753846	chr15	57445900	0.723077
chr1	39564600	0.661538	chr15	57451100	0.861538
chr1	39569000	0.738462	chr15	57453500	0.969231
chr1	39576800	0.707692	chr15	57460700	0.615385
chr1	39581100	0.769231	chr15	57465600	0.615385
chr1	39583600	0.553846	chr15	57475600	0.861538
chr1	39595700	0.676923	chr15	57505800	0.646154
chr1	39598500	0.553846	chr15	57508800	0.907692
chr1	39602600	0.615385	chr15	57511400	0.507692
chr1	39605800	0.630769	chr15	57520000	0.553846
chr1	39608100	0.953846	chr15	57528300	0.907692
chr1	39611200	0.769231	chr15	57537800	0.676923
chr1	39614600	0.692308	chr15	57544400	0.738462
chr1	39618500	0.907692	chr15	57576300	0.523077
chr1	39620900	0.969231	chr15	57590700	0.815385
chr1	39624200	0.753846	chr15	57599000	0.938462
chr1	39626900	0.569231	chr15	57616200	0.553846
chr1	39630900	0.615385	chr15	57620400	0.984615
chr1	39633800	0.661538	chr15	57626900	0.6
chr1	39636600	0.646154	chr15	57630200	0.676923
chr1	39639800	0.753846	chr15	57633300	0.538462
chr1	39642100	0.769231	chr15	57649000	0.676923
chr1	39644300	0.892308	chr15	57719900	0.523077
chr1	39649400	0.738462	chr15	57768900	0.8
chr1	39651500	0.953846	chr15	57778200	0.969231
chr1	39655600	0.8	chr15	57803000	0.553846
chr1	39657900	0.953846	chr15	57819800	0.661538
chr1	39661200	0.907692	chr15	57838200	0.523077
chr1	39679300	0.938462	chr15	57844200	0.953846
chr1	39696400	0.523077	chr15	57847700	0.523077
chr1	39704300	0.553846	chr15	57853400	0.815385
chr1	39721100	0.6	chr15	57959600	0.861538
chr1	39727600	0.923077	chr15	58475000	0.676923
chr1	39735900	0.8	chr15	58496100	0.984615
chr1	39738200	0.676923	chr15	58516800	0.553846
chr1	39850900	0.723077	chr15	58521200	0.892308
chr1	39853400	0.938462	chr15	58553400	0.815385
chr1	39855700	0.523077	chr15	58562400	0.892308
chr1	39858000	0.969231	chr15	58591600	0.815385
chr1	39861400	0.953846	chr15	58599700	0.876923
chr1	39864500	0.984615	chr15	58623000	0.876923
chr1	39872600	0.830769	chr15	58626700	0.846154
chr1	39897800	0.707692	chr15	58632300	0.523077
chr1	39917200	0.938462	chr15	58637100	0.984615
chr1	39919300	0.569231	chr15	58649700	0.815385
chr1	40006300	0.661538	chr15	58653800	0.984615
chr1	40072000	0.615385	chr15	58661800	0.723077
chr1	40079200	0.938462	chr15	58670800	0.661538
chr1	40091500	0.646154	chr15	58679500	0.861538
chr1	40108800	0.538462	chr15	58681900	1
chr1	40112300	0.784615	chr15	58685200	0.523077
chr1	40119500	0.538462	chr15	58688600	0.984615
chr1	40203200	0.6	chr15	58690700	0.8
chr1	40265800	0.738462	chr15	58702600	0.507692
chr1	40282800	0.6	chr15	58725900	0.538462
chr1	40311900	0.630769	chr15	58732500	0.938462
chr1	40332800	0.676923	chr15	58736500	0.923077
chr1	40359100	0.861538	chr15	58739400	0.507692
chr1	40362800	0.861538	chr15	58750100	0.923077
chr1	40385300	0.630769	chr15	58752200	0.738462
chr1	40400200	0.907692	chr15	58756100	0.615385
chr1	40439400	0.753846	chr15	58759900	0.861538
chr1	40442300	0.507692	chr15	58762400	0.984615
chr1	40447900	0.923077	chr15	58765400	0.907692
chr1	40454600	0.646154	chr15	58767600	0.723077
chr1	40481000	1	chr15	58769700	0.861538
chr1	40498000	0.830769	chr15	58787900	0.923077
chr1	40502500	0.907692	chr15	58791200	1
chr1	40515300	0.553846	chr15	58793800	0.661538
chr1	40525400	0.630769	chr15	58798300	1
chr1	40542900	0.692308	chr15	58803100	0.938462
chr1	40558400	0.692308	chr15	58813800	0.923077
chr1	40606200	0.661538	chr15	58820400	0.969231
chr1	40609800	0.692308	chr15	58839100	0.938462
chr1	40707700	1	chr15	58841600	1
chr1	40710900	0.523077	chr15	58844200	0.969231
chr1	40733600	0.753846	chr15	58900900	0.784615
chr1	40736000	0.723077	chr15	58903200	0.753846
chr1	40780600	0.646154	chr15	58921300	0.6
chr1	40804700	0.646154	chr15	58959400	0.738462
chr1	40845500	0.630769	chr15	59017000	0.630769
chr1	40849400	0.876923	chr15	59024100	0.738462
chr1	40851800	0.615385	chr15	59030500	0.569231
chr1	40855800	0.938462	chr15	59034700	0.569231
chr1	40858100	0.907692	chr15	59077500	0.523077
chr1	40860600	0.676923	chr15	59080700	0.507692
chr1	41049600	0.553846	chr15	59213800	0.584615
chr1	41134700	0.6	chr15	59216800	0.523077
chr1	41177000	0.692308	chr15	59244800	0.646154
chr1	41290700	0.969231	chr15	59255300	0.738462
chr1	41314500	0.707692	chr15	59272900	0.538462
chr1	41332200	0.707692	chr15	59440600	0.707692
chr1	41339200	0.830769	chr15	59458500	0.738462
chr1	41341500	0.938462	chr15	59462000	0.738462
chr1	41343700	0.953846	chr15	59467800	0.953846
chr1	41364200	0.615385	chr15	59473600	0.738462
chr1	41368000	0.676923	chr15	59478900	0.615385
chr1	41402900	0.907692	chr15	59484400	0.953846
chr1	41405700	0.892308	chr15	59492700	0.630769
chr1	41410500	0.907692	chr15	59514400	0.969231
chr1	41414700	0.738462	chr15	59524900	0.938462
chr1	41418200	0.753846	chr15	59560800	0.584615
chr1	41431500	0.815385	chr15	59584200	0.507692
chr1	41433700	1	chr15	59587400	0.938462
chr1	41436900	0.538462	chr15	59589500	0.6
chr1	41443000	0.969231	chr15	59592900	0.753846
chr1	41447900	0.523077	chr15	59597600	0.569231
chr1	41450200	0.6	chr15	59608400	0.538462
chr1	41452700	0.507692	chr15	59622300	0.723077
chr1	41469600	0.984615	chr15	59642600	0.907692
chr1	41563400	0.538462	chr15	59680900	0.892308
chr1	41568200	0.815385	chr15	59785400	0.753846
chr1	41575300	0.753846	chr15	59821400	0.646154
chr1	41589100	0.769231	chr15	59942200	0.676923
chr1	41618600	0.969231	chr15	60363300	0.938462
chr1	41621700	0.8	chr15	60383600	0.6
chr1	41658600	0.784615	chr15	60652300	0.707692
chr1	41734100	0.769231	chr15	60654800	0.553846
chr1	41825300	0.538462	chr15	60663800	0.892308
chr1	41884800	0.861538	chr15	60667100	0.969231
chr1	41898700	0.769231	chr15	60669300	0.523077
chr1	41948300	0.861538	chr15	60672200	0.876923
chr1	41952000	0.861538	chr15	60679500	0.6
chr1	41959000	0.923077	chr15	60683400	0.538462
chr1	41962100	0.938462	chr15	60686800	0.630769
chr1	41964500	0.661538	chr15	60692300	0.876923
chr1	41981900	0.815385	chr15	60694900	0.876923
chr1	42003500	0.615385	chr15	60699800	0.907692
chr1	42040100	0.815385	chr15	60706300	0.753846
chr1	42061800	0.6	chr15	60716000	0.953846
chr1	42079500	0.938462	chr15	60719600	0.553846
chr1	42083900	0.846154	chr15	60812400	0.553846
chr1	42088800	0.723077	chr15	60815800	0.507692
chr1	42092500	0.615385	chr15	60862400	0.538462
chr1	42095400	0.876923	chr15	60868300	0.707692
chr1	42097900	1	chr15	60878300	0.553846
chr1	42105600	0.8	chr15	60898400	0.569231
chr1	42115700	0.523077	chr15	60953100	0.661538
chr1	42130500	0.969231	chr15	60966500	0.830769
chr1	42132900	0.8	chr15	60971800	0.507692
chr1	42136400	0.984615	chr15	60974600	0.923077
chr1	42138800	0.876923	chr15	60988200	0.553846
chr1	42141000	0.630769	chr15	60993700	0.615385
chr1	42144000	0.923077	chr15	61001100	0.984615
chr1	42149300	0.815385	chr15	61005700	0.8
chr1	42179800	0.969231	chr15	61014200	0.984615
chr1	42184200	0.6	chr15	61038000	0.738462
chr1	42190000	0.523077	chr15	61045000	0.969231
chr1	42194500	0.569231	chr15	61051500	0.876923
chr1	42204800	0.815385	chr15	61057500	0.507692
chr1	42208200	0.984615	chr15	61067300	0.507692
chr1	42217900	0.953846	chr15	61092500	0.738462
chr1	42224700	0.815385	chr15	61128500	0.861538
chr1	42239200	0.861538	chr15	61152500	0.876923
chr1	42249100	0.969231	chr15	61157900	0.615385
chr1	42278300	0.969231	chr15	61209400	0.676923
chr1	42309300	0.8	chr15	61234000	0.969231
chr1	42312300	0.523077	chr15	61238200	0.507692
chr1	42317600	0.876923	chr15	61241800	0.784615
chr1	42328700	0.846154	chr15	61258700	0.923077
chr1	42336200	0.846154	chr15	61263100	0.953846
chr1	42342400	0.938462	chr15	61268700	0.661538
chr1	42357200	0.523077	chr15	61274700	0.661538
chr1	42360800	0.507692	chr15	61285400	0.553846
chr1	42364500	0.507692	chr15	61327200	0.923077
chr1	42368000	0.938462	chr15	61340200	0.676923
chr1	42386000	0.523077	chr15	61342600	0.969231
chr1	42421400	0.923077	chr15	62126600	0.523077
chr1	42612800	0.538462	chr15	62327900	0.692308
chr1	42643400	0.615385	chr15	62411800	0.876923
chr1	42692600	0.507692	chr15	62685500	0.507692
chr1	42706900	0.523077	chr15	62695500	0.876923
chr1	42744800	0.507692	chr15	62731900	0.969231
chr1	42785500	0.738462	chr15	62736900	0.969231
chr1	42788400	0.569231	chr15	62739800	0.523077
chr1	42950300	0.692308	chr15	62746600	0.969231
chr1	42995900	0.584615	chr15	62749000	0.661538
chr1	42999100	0.676923	chr15	62754800	0.692308
chr1	43272500	0.538462	chr15	62757200	0.953846
chr1	43379300	0.676923	chr15	62762000	0.876923
chr1	43403200	0.784615	chr15	62765100	0.523077
chr1	43406800	0.923077	chr15	62775500	0.630769
chr1	43411200	0.553846	chr15	62788400	0.830769
chr1	43415400	0.784615	chr15	62790900	0.738462
chr1	43418800	0.523077	chr15	62795700	0.676923
chr1	43429400	0.953846	chr15	62798600	0.984615
chr1	43433000	0.969231	chr15	62801200	0.569231
chr1	43437800	0.876923	chr15	62815400	0.953846
chr1	43444400	0.984615	chr15	62838200	0.523077
chr1	43464400	0.846154	chr15	62862100	0.876923
chr1	43502300	0.523077	chr15	62881600	0.6
chr1	43515200	0.507692	chr15	62884600	0.692308
chr1	43518700	0.630769	chr15	62896100	0.723077
chr1	43522200	0.923077	chr15	62898800	1
chr1	43526000	0.984615	chr15	62909000	0.523077
chr1	43535100	0.738462	chr15	62911100	0.892308
chr1	43539600	0.692308	chr15	62917600	0.8
chr1	43671700	0.707692	chr15	63011600	0.615385
chr1	43673900	0.784615	chr15	63031900	0.523077
chr1	43680600	0.815385	chr15	63034800	0.846154
chr1	43693200	0.984615	chr15	63050600	0.8
chr1	43695900	0.846154	chr15	63063200	0.969231
chr1	43698100	0.830769	chr15	63074300	0.861538
chr1	43702800	0.584615	chr15	63078500	0.523077
chr1	43709600	0.569231	chr15	63101600	0.538462
chr1	43733100	0.646154	chr15	63116700	0.938462
chr1	43735800	0.507692	chr15	63133600	0.876923
chr1	43761500	0.707692	chr15	63137900	0.507692
chr1	43796000	0.815385	chr15	63143200	1
chr1	43810800	0.646154	chr15	63146300	0.861538
chr1	43815900	0.923077	chr15	63165700	0.676923
chr1	43823000	0.538462	chr15	63168000	0.630769
chr1	43839000	0.969231	chr15	63176300	0.907692
chr1	43931700	0.553846	chr15	63179300	0.923077
chr1	43934900	0.815385	chr15	63182200	0.676923
chr1	43938600	0.984615	chr15	63187200	0.630769
chr1	43941900	0.907692	chr15	63189400	1
chr1	43959500	0.646154	chr15	63213300	0.784615
chr1	43989100	0.846154	chr15	63220900	0.938462
chr1	43992000	0.953846	chr15	63225000	0.953846
chr1	43995100	0.876923	chr15	63227600	0.676923
chr1	44024300	0.646154	chr15	63233200	1
chr1	44031500	0.569231	chr15	63251100	0.923077
chr1	44048000	0.846154	chr15	63259400	0.584615
chr1	44053500	0.861538	chr15	63265200	0.815385
chr1	44137800	0.553846	chr15	63268600	0.953846
chr1	44154500	0.630769	chr15	63271700	0.769231
chr1	44177500	0.953846	chr15	63278200	0.723077
chr1	44186100	0.553846	chr15	63282000	0.6
chr1	44240300	0.830769	chr15	63287400	0.553846
chr1	44249600	0.615385	chr15	63292200	0.523077
chr1	44252600	0.569231	chr15	63298900	0.707692
chr1	44261900	0.569231	chr15	63305700	0.876923
chr1	44266000	0.923077	chr15	63308100	0.830769
chr1	44288000	0.923077	chr15	63312100	0.923077
chr1	44300900	0.738462	chr15	63315800	0.984615
chr1	44319300	0.769231	chr15	63322200	0.507692
chr1	44324200	0.953846	chr15	63331300	0.769231
chr1	44327200	0.538462	chr15	63342700	0.769231
chr1	44334400	0.538462	chr15	63346000	0.646154
chr1	44378500	0.6	chr15	63348900	0.523077
chr1	44387900	0.538462	chr15	63364900	0.707692
chr1	44395500	0.569231	chr15	63367900	0.815385
chr1	44400400	0.692308	chr15	63372500	0.907692
chr1	44453000	0.615385	chr15	63379300	0.907692
chr1	44471500	0.861538	chr15	63381700	1
chr1	44509500	0.692308	chr15	63383900	0.584615
chr1	44512900	0.753846	chr15	63387100	1
chr1	44515700	1	chr15	63389500	0.923077
chr1	44538100	0.969231	chr15	63396800	0.661538
chr1	44540500	0.784615	chr15	63400300	0.923077
chr1	44551200	0.507692	chr15	63404000	0.907692
chr1	44555200	0.507692	chr15	63407000	0.815385
chr1	44574200	0.738462	chr15	63418800	0.553846
chr1	44686100	0.538462	chr15	63426200	0.907692
chr1	44793800	0.938462	chr15	63428300	0.907692
chr1	44844100	0.676923	chr15	63443200	0.738462
chr1	44856100	0.738462	chr15	63457900	0.969231
chr1	45061000	0.630769	chr15	63465300	0.523077
chr1	45075400	0.815385	chr15	63469300	0.584615
chr1	45083100	0.753846	chr15	63478200	0.953846
chr1	45085400	0.907692	chr15	63486100	0.6
chr1	45087900	0.938462	chr15	63491200	0.876923
chr1	45095000	0.938462	chr15	63494600	0.507692
chr1	45112100	0.723077	chr15	63504700	0.830769
chr1	45142400	0.769231	chr15	63510700	0.630769
chr1	45173000	0.938462	chr15	63526000	0.830769
chr1	45180800	0.661538	chr15	63528800	0.738462
chr1	45183100	0.523077	chr15	63531300	0.507692
chr1	45197100	0.876923	chr15	63535600	0.815385
chr1	45252100	0.507692	chr15	63539700	0.753846
chr1	45273200	0.676923	chr15	63542800	0.892308
chr1	45277600	0.923077	chr15	63549000	0.692308
chr1	45281200	0.815385	chr15	63581200	0.876923
chr1	45301900	0.738462	chr15	63583800	0.907692
chr1	45360500	0.907692	chr15	63625200	0.846154
chr1	45384800	0.538462	chr15	63637400	0.630769
chr1	45390700	0.969231	chr15	63640700	0.923077
chr1	45392800	0.784615	chr15	63643100	0.661538
chr1	45412900	0.692308	chr15	63658800	0.723077
chr1	45480400	0.630769	chr15	63661700	0.569231
chr1	45712700	0.907692	chr15	63664700	0.969231
chr1	45732400	0.923077	chr15	63667200	0.984615
chr1	45738900	0.738462	chr15	63672700	0.523077
chr1	45766100	0.538462	chr15	63694900	0.538462
chr1	45813900	0.723077	chr15	63697200	0.738462
chr1	45826700	0.507692	chr15	63729300	0.784615
chr1	45841500	0.753846	chr15	63754700	0.953846
chr1	45908200	0.6	chr15	63759000	0.723077
chr1	45979500	0.661538	chr15	63766500	0.876923
chr1	45981800	0.584615	chr15	63768600	0.953846
chr1	45989100	0.615385	chr15	63772100	0.969231
chr1	46036000	0.584615	chr15	63776400	0.907692
chr1	46106200	0.753846	chr15	63779700	0.507692
chr1	46135400	0.861538	chr15	63784400	0.923077
chr1	46187100	0.553846	chr15	63786500	0.738462
chr1	46232900	0.769231	chr15	63789500	0.584615
chr1	46235000	0.907692	chr15	63794000	0.723077
chr1	46312600	0.553846	chr15	63802400	0.784615
chr1	46337800	0.6	chr15	63816000	0.753846
chr1	46346800	0.707692	chr15	63843800	0.769231
chr1	46349500	0.769231	chr15	63846100	0.507692
chr1	46358200	0.769231	chr15	63875400	0.523077
chr1	46379300	0.876923	chr15	63879700	0.507692
chr1	46395200	1	chr15	63889500	0.876923
chr1	46411600	0.753846	chr15	63902600	0.784615
chr1	46419900	0.723077	chr15	63921900	0.584615
chr1	46436200	0.569231	chr15	63971000	0.707692
chr1	46502800	0.507692	chr15	64011200	0.815385
chr1	46505600	0.569231	chr15	64072600	0.538462
chr1	46550400	0.861538	chr15	64149500	0.553846
chr1	46600400	0.538462	chr15	64163000	0.861538
chr1	46603800	0.707692	chr15	64183400	0.892308
chr1	46617900	0.8	chr15	64189000	0.861538
chr1	46639400	0.676923	chr15	64202000	0.569231
chr1	46645400	0.738462	chr15	64232100	0.984615
chr1	46649000	0.907692	chr15	64237800	0.661538
chr1	46657200	0.876923	chr15	64243300	0.969231
chr1	46689300	0.538462	chr15	64263200	0.723077
chr1	46754400	0.553846	chr15	64265700	0.861538
chr1	46814000	0.523077	chr15	64284900	0.538462
chr1	46868100	0.723077	chr15	64291600	0.615385
chr1	46912900	0.507692	chr15	64360000	0.707692
chr1	46986400	0.876923	chr15	64363800	0.892308
chr1	47013900	0.523077	chr15	64446000	0.661538
chr1	47065900	0.738462	chr15	64524900	0.584615
chr1	47079700	0.707692	chr15	64540300	0.784615
chr1	47109100	0.984615	chr15	64630200	0.569231
chr1	47139600	0.507692	chr15	64637300	0.753846
chr1	47191200	0.507692	chr15	64670900	0.907692
chr1	47641200	0.6	chr15	64697700	0.830769
chr1	47658800	0.784615	chr15	64722700	0.984615
chr1	47761600	0.538462	chr15	64736700	0.938462
chr1	47783800	0.861538	chr15	64749000	0.707692
chr1	47806300	0.723077	chr15	64782900	0.6
chr1	47840100	0.676923	chr15	64795500	0.630769
chr1	47875200	0.907692	chr15	64799800	0.615385
chr1	47877500	0.569231	chr15	64819900	0.676923
chr1	47898100	0.538462	chr15	64828600	0.938462
chr1	48035600	0.553846	chr15	64866600	0.553846
chr1	48176400	0.584615	chr15	64892400	0.538462
chr1	48668000	0.769231	chr15	64923000	0.830769
chr1	48795400	0.569231	chr15	64927800	0.907692
chr1	48960200	0.938462	chr15	64944100	0.538462
chr1	48964000	0.553846	chr15	64960300	0.876923
chr1	50814600	0.707692	chr15	64978500	0.553846
chr1	50834200	0.692308	chr15	64985700	0.815385
chr1	50997400	0.538462	chr15	64992300	0.507692
chr1	51069600	0.723077	chr15	65020600	0.830769
chr1	51110200	0.615385	chr15	65023700	0.8
chr1	51124600	0.738462	chr15	65041700	0.6
chr1	51127400	0.615385	chr15	65128200	0.692308
chr1	51131400	0.753846	chr15	65139800	0.538462
chr1	51163700	0.6	chr15	65143800	0.984615
chr1	51529000	0.923077	chr15	65146700	0.769231
chr1	51680500	0.676923	chr15	65149200	0.969231
chr1	51727200	0.738462	chr15	65151700	0.661538
chr1	51730300	0.907692	chr15	65156200	0.692308
chr1	51734200	0.723077	chr15	65158500	0.969231
chr1	51762700	0.553846	chr15	65160600	0.538462
chr1	51780200	0.861538	chr15	65165500	0.938462
chr1	51794400	0.569231	chr15	65169600	0.523077
chr1	51797100	0.630769	chr15	65174300	0.707692
chr1	51883600	0.523077	chr15	65176400	1
chr1	51889100	0.676923	chr15	65186300	0.984615
chr1	51911300	0.553846	chr15	65189700	0.984615
chr1	51986300	0.815385	chr15	65197800	0.523077
chr1	52014900	0.523077	chr15	65222900	0.538462
chr1	52030000	0.538462	chr15	65277900	0.692308
chr1	52035600	0.861538	chr15	65331700	0.523077
chr1	52049400	0.723077	chr15	65337600	0.8
chr1	52078600	0.676923	chr15	65343000	0.815385
chr1	52088100	0.553846	chr15	65346900	0.553846
chr1	52090800	0.615385	chr15	65349700	0.523077
chr1	52103100	1	chr15	65359100	0.723077
chr1	52106000	0.646154	chr15	65361700	1
chr1	52108600	0.923077	chr15	65364300	0.738462
chr1	52110800	0.707692	chr15	65375800	0.830769
chr1	52114400	0.907692	chr15	65381800	0.8
chr1	52117400	0.523077	chr15	65403100	0.753846
chr1	52127100	0.892308	chr15	65481900	0.692308
chr1	52132100	0.661538	chr15	65530800	0.615385
chr1	52135100	0.723077	chr15	65538000	0.738462
chr1	52137700	0.953846	chr15	65563600	0.738462
chr1	52156300	0.923077	chr15	65568100	0.569231
chr1	52159200	0.815385	chr15	65588700	0.569231
chr1	52216300	0.507692	chr15	65602600	0.907692
chr1	52234800	0.538462	chr15	65611400	0.892308
chr1	52251000	0.815385	chr15	65667200	0.523077
chr1	52273000	0.507692	chr15	65701600	0.892308
[truncated: 63,536 more rows]
