# Supplementary material for: RFECS: A Random-Forest Based Algorithm for Enhancer Identification from Chromatin State
Source: PLoS Comput Biol. 2013 Mar 14;9(3):e1002968. doi: 10.1371/journal.pcbi.1002968 (PMC3597546; doi:10.1371/journal.pcbi.1002968)
Supplement: Table S8 — All p300 binding-sites called using MACS in CD4+ T-cells (hg18). (XLS) [file pcbi.1002968.s015.xls]

## Sheet: p300_all
Table S8.All p300 binding-sites called using MACS in CD4+ T-cells(hg18)
Chromosome	Location
chr1	557443
chr1	559792
chr1	703860
chr1	941502
chr1	1157273
chr1	1296659
chr1	1300702
chr1	1332556
chr1	1437281
chr1	1580465
chr1	1645662
chr1	1701940
chr1	1812418
chr1	1940831
chr1	2070106
chr1	2149342
chr1	2155776
chr1	2177376
chr1	2212250
chr1	2222544
chr1	2313064
chr1	2499722
chr1	3702983
chr1	3763748
chr1	3807221
chr1	3817394
chr1	4262963
chr1	5975049
chr1	6009028
chr1	6182275
chr1	6347960
chr1	6443218
chr1	6537095
chr1	6684485
chr1	6767720
chr1	7944237
chr1	8135524
chr1	8861341
chr1	9141416
chr1	9409123
chr1	9411650
chr1	9521880
chr1	9609770
chr1	9700363
chr1	9857682
chr1	10015536
chr1	10381789
chr1	10413032
chr1	10595688
chr1	11245455
chr1	11890522
chr1	11963100
chr1	12156582
chr1	12161905
chr1	12212582
chr1	12493422
chr1	12587120
chr1	12641813
chr1	13902033
chr1	13930053
chr1	15725791
chr1	16035096
chr1	16148970
chr1	16566169
chr1	16639788
chr1	16713182
chr1	16843810
chr1	17103998
chr1	17113061
chr1	17253291
chr1	19102013
chr1	19126064
chr1	19147590
chr1	19273660
chr1	19450676
chr1	19590241
chr1	19662443
chr1	19795993
chr1	19887479
chr1	20707268
chr1	20860484
chr1	21493625
chr1	21533368
chr1	21982401
chr1	22156445
chr1	22218245
chr1	22239077
chr1	22251610
chr1	22651029
chr1	23367935
chr1	23567413
chr1	23603084
chr1	23739039
chr1	23818873
chr1	23890875
chr1	23999961
chr1	24024471
chr1	24067353
chr1	24158217
chr1	24179415
chr1	24521350
chr1	24614632
chr1	24705811
chr1	24735775
chr1	24842015
chr1	25110377
chr1	25124395
chr1	25221618
chr1	25231625
chr1	25431569
chr1	25446515
chr1	25629400
chr1	25761860
chr1	25875329
chr1	25974117
chr1	25996030
chr1	26197437
chr1	26368906
chr1	26484010
chr1	26486742
chr1	26520750
chr1	26558080
chr1	26577522
chr1	26631384
chr1	26741123
chr1	26819482
chr1	26820052
chr1	26891522
chr1	26894746
chr1	26943360
chr1	27089410
chr1	27099552
chr1	27120609
chr1	27354211
chr1	27521217
chr1	27689838
chr1	27721536
chr1	27817550
chr1	27862457
chr1	27871284
chr1	27924878
chr1	28029890
chr1	28057312
chr1	28086390
chr1	28113778
chr1	28287765
chr1	28398881
chr1	28432127
chr1	28435061
chr1	28528202
chr1	28705050
chr1	28752038
chr1	28780945
chr1	28842134
chr1	28847736
chr1	29081392
chr1	29113626
chr1	29126179
chr1	29381151
chr1	30989685
chr1	30995492
chr1	31005348
chr1	31542536
chr1	32002557
chr1	32127648
chr1	32178262
chr1	32252041
chr1	32346239
chr1	32460529
chr1	32488247
chr1	32632710
chr1	32888616
chr1	33055559
chr1	33203032
chr1	33337632
chr1	33365535
chr1	35098043
chr1	35431324
chr1	35506783
chr1	35744350
chr1	35777482
chr1	35879716
chr1	35957340
chr1	36008140
chr1	36169473
chr1	36327101
chr1	36387970
chr1	36399250
chr1	36426510
chr1	36462432
chr1	36659211
chr1	36702621
chr1	37792518
chr1	37834145
chr1	37928908
chr1	38097942
chr1	38228371
chr1	38250908
chr1	38798003
chr1	39098321
chr1	39216106
chr1	39264544
chr1	39422187
chr1	39434243
chr1	39497133
chr1	39815202
chr1	40279048
chr1	40335553
chr1	40399653
chr1	40496340
chr1	40624059
chr1	40769831
chr1	40929982
chr1	41100642
chr1	41242226
chr1	41441537
chr1	42136672
chr1	42573580
chr1	42701441
chr1	42896619
chr1	42920608
chr1	43005266
chr1	43197122
chr1	43311971
chr1	43410615
chr1	43888357
chr1	43945675
chr1	44185077
chr1	44451627
chr1	44593519
chr1	45013856
chr1	45038395
chr1	45046112
chr1	45058335
chr1	45224933
chr1	45250373
chr1	45578475
chr1	45729476
chr1	45738487
chr1	45760132
chr1	45822399
chr1	45988843
chr1	45989150
chr1	46485939
chr1	46542022
chr1	51198611
chr1	52104645
chr1	52117155
chr1	52272096
chr1	52604712
chr1	52642801
chr1	52875843
chr1	53160006
chr1	53253212
chr1	53435006
chr1	53476866
chr1	54076913
chr1	54291411
chr1	54438412
chr1	54713889
chr1	55002901
chr1	55210120
chr1	55453732
chr1	57545937
chr1	58784991
chr1	58938344
chr1	59022285
chr1	59051400
chr1	61963671
chr1	62674608
chr1	63022302
chr1	63761413
chr1	63791141
chr1	66574438
chr1	67163449
chr1	67668774
chr1	67923431
chr1	70444021
chr1	70449350
chr1	70593356
chr1	70649184
chr1	71319543
chr1	74436674
chr1	74971424
chr1	75561940
chr1	76024542
chr1	77457731
chr1	78017893
chr1	78217448
chr1	80389566
chr1	84717517
chr1	85497898
chr1	85946774
chr1	86634858
chr1	87152433
chr1	88922291
chr1	89129860
chr1	89849118
chr1	91260455
chr1	91625490
chr1	92043029
chr1	92186808
chr1	93070330
chr1	93267642
chr1	93317404
chr1	93584040
chr1	94117311
chr1	94147790
chr1	94656419
chr1	95311093
chr1	95472365
chr1	99109790
chr1	100208186
chr1	100257647
chr1	100371144
chr1	100488044
chr1	100504598
chr1	100589566
chr1	100678465
chr1	100690950
chr1	100869920
chr1	101134884
chr1	101187831
chr1	101350408
chr1	101473973
chr1	101517166
chr1	101526926
chr1	101547951
chr1	107914631
chr1	108904016
chr1	108991157
chr1	109005222
chr1	109036943
chr1	109090782
chr1	109386228
chr1	109420371
chr1	109434866
chr1	109444450
chr1	109458218
chr1	109627445
chr1	109770704
chr1	109828208
chr1	109892676
chr1	109965252
chr1	110328759
chr1	110378716
chr1	110502215
chr1	110682924
chr1	110751907
chr1	110963861
chr1	110975676
chr1	110991640
chr1	111219602
chr1	111308378
chr1	111548127
chr1	111560457
chr1	111948369
chr1	111960635
chr1	112099796
chr1	112963978
chr1	113060576
chr1	113373051
chr1	113417156
chr1	113734662
chr1	114215894
chr1	114249331
chr1	114274412
chr1	114685622
chr1	114690839
chr1	114855368
chr1	114925962
chr1	115102292
chr1	115124799
chr1	115407032
chr1	115443628
chr1	116483326
chr1	116512766
chr1	116762755
chr1	116848712
chr1	116859393
chr1	117113910
chr1	117171589
chr1	117331520
chr1	117879277
chr1	117950234
chr1	118000511
chr1	118003076
chr1	118008691
chr1	118098406
chr1	118273811
chr1	119484768
chr1	120640237
chr1	121186551
chr1	141477042
chr1	141729198
chr1	143247654
chr1	143619886
chr1	143643666
chr1	143751355
chr1	143770585
chr1	143807826
chr1	143988831
chr1	144094166
chr1	144168769
chr1	144218949
chr1	145180873
chr1	145483651
chr1	146273453
chr1	146608170
chr1	147302014
chr1	147491193
chr1	148124870
chr1	148166478
chr1	148475071
chr1	148532852
chr1	148602835
chr1	148818717
chr1	148850764
chr1	148868775
chr1	148936319
chr1	149115774
chr1	149165357
chr1	149247322
chr1	149309779
chr1	149405098
chr1	149429250
chr1	149437527
chr1	149493882
chr1	149520889
chr1	149586819
chr1	149638521
chr1	150184884
chr1	150287228
chr1	151784448
chr1	151811818
chr1	151873088
chr1	151910204
chr1	151967055
chr1	152162343
chr1	152197747
chr1	152206986
chr1	152229875
chr1	152409429
chr1	152459775
chr1	152511559
chr1	152574323
chr1	152704166
chr1	152798063
chr1	153024176
chr1	153176507
chr1	153194434
chr1	153213686
chr1	153256794
chr1	153412445
chr1	153463886
chr1	153481217
chr1	153498803
chr1	153545106
chr1	153751202
chr1	153981998
chr1	154170978
chr1	154257390
chr1	154318171
chr1	154333711
chr1	154342830
chr1	154363728
chr1	154430378
chr1	154453046
chr1	154519329
chr1	154532215
chr1	154575009
chr1	154693595
chr1	154737848
chr1	154741674
chr1	154837879
chr1	154965279
chr1	154977671
chr1	155003789
chr1	155053210
chr1	158017239
chr1	158147070
chr1	158268327
chr1	158499058
chr1	158579865
chr1	158776781
chr1	158865889
chr1	159004855
chr1	159032582
chr1	159074088
chr1	159250414
chr1	159282405
chr1	159304920
chr1	159306354
chr1	159390381
chr1	159402849
chr1	159438768
chr1	159462396
chr1	159550802
chr1	159636119
chr1	159760342
chr1	161558269
chr1	163629077
chr1	163829026
chr1	163866851
chr1	163977306
chr1	164004775
chr1	165683683
chr1	165864098
chr1	166172008
chr1	166414723
chr1	167840631
chr1	168030660
chr1	168129710
chr1	168310482
chr1	169549828
chr1	169721252
chr1	169977944
chr1	170017136
chr1	170768734
chr1	170898609
chr1	170935158
chr1	170944393
chr1	171000257
chr1	172060237
chr1	172104092
chr1	172258129
chr1	173204762
chr1	173235409
chr1	173259158
chr1	173444983
chr1	174443505
chr1	177601816
chr1	178118256
chr1	178190396
chr1	178738667
chr1	178867682
chr1	179324521
chr1	179378396
chr1	179395570
chr1	180852012
chr1	180865708
chr1	181025406
chr1	182192670
chr1	182287416
chr1	182990729
chr1	183126485
chr1	183392833
chr1	183552988
chr1	184611190
chr1	186412617
chr1	190752747
chr1	190811591
chr1	191044843
chr1	191295220
chr1	191357708
chr1	191715245
chr1	194572994
chr1	195367985
chr1	195437279
chr1	196857112
chr1	196917713
chr1	197911457
chr1	199255377
chr1	199350090
chr1	200191176
chr1	200577780
chr1	200584635
chr1	201124699
chr1	201242971
chr1	201262263
chr1	201541261
chr1	201556862
chr1	201560039
chr1	201862479
chr1	201909934
chr1	201918543
chr1	202000928
chr1	202031386
chr1	202097287
chr1	202647682
chr1	202748950
chr1	202752136
chr1	202757199
chr1	203043334
chr1	203357916
chr1	203524155
chr1	203827858
chr1	203986188
chr1	204803255
chr1	204820016
chr1	204852556
chr1	205043376
chr1	205561540
chr1	205711074
chr1	206063927
chr1	208008595
chr1	208009551
chr1	208024741
chr1	208067940
chr1	209819087
chr1	210798991
chr1	211031805
chr1	211291193
chr1	211910519
chr1	212667993
chr1	213456430
chr1	216095405
chr1	216525237
chr1	217413782
chr1	217902978
chr1	218286632
chr1	218329856
chr1	218512291
chr1	218946109
chr1	219953176
chr1	219982027
chr1	220466429
chr1	220660745
chr1	220829898
chr1	220884171
chr1	220895022
chr1	221321337
chr1	221373825
chr1	221488914
chr1	222100557
chr1	222246950
chr1	222368423
chr1	222436945
chr1	222611140
chr1	222878354
chr1	223699399
chr1	223729302
chr1	224032022
chr1	224151663
chr1	224178589
chr1	224253914
chr1	224256554
chr1	224441036
chr1	224662405
chr1	224907949
chr1	224917382
chr1	224929577
chr1	224945025
chr1	224993774
chr1	225082521
chr1	225194582
chr1	225989664
chr1	226020884
chr1	226363577
chr1	226385464
chr1	226394390
chr1	226420407
chr1	226440060
chr1	226661120
chr1	226712245
chr1	226719213
chr1	226741181
chr1	227710844
chr1	227828511
chr1	228743619
chr1	228844950
chr1	229074396
chr1	229175343
chr1	229443598
chr1	229540470
chr1	229625016
chr1	229730889
chr1	231126482
chr1	232575752
chr1	232961411
chr1	232974923
chr1	233047836
chr1	233214478
chr1	233358995
chr1	233734725
chr1	233941846
chr1	234229495
chr1	234989370
chr1	235833071
chr1	237949742
chr1	240077793
chr1	240165019
chr1	241485087
chr1	241632915
chr1	242278031
chr1	242304949
chr1	242682185
chr1	242882626
chr1	243064784
chr1	244796209
chr1	244929240
chr1	245050019
chr1	245161904
chr1	245505977
chr1	247087466
chr1	247119916
chr1	247167210
chr10	506440
chr10	1024303
chr10	1085021
chr10	1092758
chr10	1146198
chr10	3817712
chr10	3837564
chr10	3920143
chr10	3981218
chr10	4092151
chr10	5478597
chr10	5895431
chr10	5972219
chr10	6132892
chr10	6170798
chr10	6245924
chr10	6352447
chr10	6430286
chr10	6580829
chr10	6612300
chr10	6625543
chr10	6689291
chr10	6995222
chr10	7566609
chr10	7870120
chr10	7900433
chr10	8414538
chr10	8520864
chr10	9178481
chr10	10726484
chr10	11227595
chr10	11245273
chr10	11260872
chr10	11485271
chr10	11766933
chr10	12125013
chr10	12150772
chr10	12530986
chr10	13243392
chr10	13384145
chr10	13668873
chr10	13869199
chr10	14589346
chr10	14654194
chr10	14665469
chr10	14730595
chr10	14920078
chr10	15042052
chr10	15179092
chr10	16899606
chr10	17085336
chr10	17105629
chr10	17510829
chr10	18980504
chr10	18988229
chr10	20581009
chr10	22070057
chr10	22765979
chr10	22940822
chr10	22995555
chr10	23768002
chr10	25223880
chr10	26261477
chr10	26777850
chr10	26804687
chr10	27484046
chr10	27833157
chr10	28663372
chr10	28861823
chr10	29988222
chr10	30010832
chr10	30356411
chr10	30863662
chr10	32661389
chr10	32675339
chr10	32676095
chr10	32775022
chr10	33463227
chr10	33468197
chr10	35350440
chr10	35419532
chr10	35456072
chr10	35525039
chr10	35776813
chr10	36832444
chr10	37126770
chr10	38186729
chr10	38305651
chr10	38339496
chr10	38423653
chr10	38685351
chr10	38731742
chr10	39194199
chr10	41685084
chr10	41689116
chr10	41699917
chr10	41727399
chr10	41738653
chr10	41852761
chr10	41862183
chr10	41918551
chr10	42453729
chr10	42598201
chr10	42682284
chr10	42921162
chr10	42953769
chr10	43177663
chr10	43252224
chr10	43271096
chr10	45214079
chr10	45285822
chr10	45410326
chr10	48047680
chr10	49184622
chr10	49534330
chr10	50581356
chr10	51497701
chr10	53129324
chr10	57012780
chr10	58240607
chr10	59764770
chr10	62410413
chr10	62718235
chr10	62857809
chr10	63481067
chr10	63613310
chr10	64246608
chr10	64563083
chr10	64698989
chr10	68475299
chr10	69042947
chr10	69193927
chr10	69279255
chr10	69314438
chr10	69761845
chr10	69808529
chr10	69957356
chr10	70150827
chr10	70330799
chr10	70385943
chr10	70517951
chr10	70519912
chr10	70609570
chr10	70855784
chr10	70937801
chr10	71576538
chr10	71604060
chr10	71663502
chr10	71833742
chr10	71907679
chr10	72744122
chr10	72748672
chr10	73157614
chr10	73178732
chr10	73281011
chr10	73518493
chr10	73645744
chr10	73678735
chr10	73691044
chr10	73703646
chr10	73727240
chr10	73735400
chr10	73761400
chr10	73764924
chr10	73784790
chr10	74055817
chr10	74121913
chr10	74526637
chr10	74677023
chr10	74682497
chr10	74925875
chr10	75055856
chr10	75173852
chr10	75211778
chr10	75215070
chr10	75241628
chr10	75279034
chr10	75309590
chr10	75580745
chr10	75606537
chr10	76016031
chr10	76019190
chr10	76256349
chr10	76640054
chr10	77917798
chr10	79266304
chr10	79463663
chr10	80381529
chr10	80753225
chr10	81937409
chr10	82237679
chr10	82255372
chr10	84216215
chr10	85889079
chr10	86080158
chr10	86083918
chr10	87362302
chr10	88149800
chr10	88335407
chr10	88721182
chr10	88845442
chr10	89567989
chr10	89612141
chr10	90135401
chr10	91001505
chr10	91083989
chr10	92621601
chr10	92913437
chr10	93673388
chr10	94040781
chr10	94341605
chr10	94342721
chr10	95452421
chr10	97311144
chr10	97443867
chr10	97839922
chr10	97879776
chr10	99151072
chr10	99175888
chr10	99195781
chr10	99437114
chr10	99486876
chr10	99884382
chr10	101180539
chr10	101481833
chr10	101935878
chr10	102285587
chr10	103103701
chr10	103273660
chr10	103568322
chr10	103805994
chr10	103822887
chr10	103882502
chr10	103901992
chr10	103995214
chr10	104143833
chr10	104149434
chr10	104182495
chr10	104200117
chr10	104252593
chr10	104392074
chr10	104424011
chr10	104464145
chr10	104493492
chr10	104903038
chr10	105117712
chr10	105146283
chr10	105428081
chr10	105871648
chr10	105982157
chr10	106079282
chr10	106103548
chr10	111760088
chr10	112054792
chr10	112164350
chr10	112247472
chr10	112317374
chr10	112533413
chr10	112610571
chr10	112614708
chr10	112668924
chr10	115711432
chr10	116276598
chr10	116290926
chr10	116551229
chr10	116687970
chr10	117676985
chr10	117946272
chr10	119796440
chr10	120091870
chr10	120448160
chr10	120504583
chr10	120830329
chr10	120928065
chr10	120958764
chr10	121018502
chr10	121055800
chr10	121251984
chr10	121346525
chr10	121622413
chr10	121642025
chr10	124124030
chr10	124903692
chr10	124990862
chr10	126097607
chr10	126398254
chr10	126480357
chr10	126595485
chr10	127398290
chr10	127502169
chr10	127720520
chr10	131799535
chr10	134111280
chr10	134972368
chr10	135350709
chr11	197584
chr11	226567
chr11	259533
chr11	397101
chr11	441025
chr11	545056
chr11	550628
chr11	558772
chr11	566317
chr11	578306
chr11	683148
chr11	718150
chr11	799864
chr11	915898
chr11	1041239
chr11	1925106
chr11	2378265
chr11	2677781
chr11	2915618
chr11	2970164
chr11	2992256
chr11	3319265
chr11	3356969
chr11	3775547
chr11	3832390
chr11	3925065
chr11	4046970
chr11	4072400
chr11	6212651
chr11	6368171
chr11	6380593
chr11	6590142
chr11	6596895
chr11	6661281
chr11	7379764
chr11	7965353
chr11	8660802
chr11	8667170
chr11	9228577
chr11	9292674
chr11	9342648
chr11	9362764
chr11	9439172
chr11	9695007
chr11	9981956
chr11	10437384
chr11	10729390
chr11	10787218
chr11	10836145
chr11	11127935
chr11	11134664
chr11	12202851
chr11	13646806
chr11	13847379
chr11	13918921
chr11	14053400
chr11	14478004
chr11	14556839
chr11	14743526
chr11	14869409
chr11	16716657
chr11	17055878
chr11	18084196
chr11	18300355
chr11	18361644
chr11	18505062
chr11	18612528
chr11	19095274
chr11	19691009
chr11	20341819
chr11	20365688
chr11	22581337
chr11	22603947
chr11	25972234
chr11	26668996
chr11	27086327
chr11	27484635
chr11	30301095
chr11	31487878
chr11	32561792
chr11	33139645
chr11	34083702
chr11	34152620
chr11	34336093
chr11	34462001
chr11	35018454
chr11	35023567
chr11	35060834
chr11	35061838
chr11	35117297
chr11	35144386
chr11	35155574
chr11	35195291
chr11	35225621
chr11	35309238
chr11	36267580
chr11	38050441
chr11	43290031
chr11	43337225
chr11	43658870
chr11	43858829
chr11	44547575
chr11	45333509
chr11	45804859
chr11	45825626
chr11	45896123
chr11	46595398
chr11	46649234
chr11	46678913
chr11	47213072
chr11	47386478
chr11	47531351
chr11	47557126
chr11	47620962
chr11	47693660
chr11	47745763
chr11	47979994
chr11	48034202
chr11	48674737
chr11	48815948
chr11	48820344
chr11	50394469
chr11	50479050
chr11	50608258
chr11	50653520
chr11	50716579
chr11	51075999
chr11	51447908
chr11	54625441
chr11	54672391
chr11	54765890
chr11	54769465
chr11	54777034
chr11	57055156
chr11	57181735
chr11	57191597
chr11	57236590
chr11	57265374
chr11	57316376
chr11	58102099
chr11	58991140
chr11	59140281
chr11	59193165
chr11	59278230
chr11	59334896
chr11	60047635
chr11	60430819
chr11	60510313
chr11	60528995
chr11	60566493
chr11	60585448
chr11	60607765
chr11	60636019
chr11	60857151
chr11	60954163
chr11	61316558
chr11	61549783
chr11	62075954
chr11	62084787
chr11	62097821
chr11	62115666
chr11	62123383
chr11	62146328
chr11	62165047
chr11	62170657
chr11	62177398
chr11	62189378
chr11	62203218
chr11	62233700
chr11	62251627
chr11	62278257
chr11	62329495
chr11	62363677
chr11	62379958
chr11	63055693
chr11	63091170
chr11	63205416
chr11	63462993
chr11	63498515
chr11	63510415
chr11	63546022
chr11	63709950
chr11	63794099
chr11	63809205
chr11	63841615
chr11	63864221
chr11	64303014
chr11	64335062
chr11	64402695
chr11	64441436
chr11	64448207
chr11	64608259
chr11	64620202
chr11	64641825
chr11	64646266
chr11	64658712
chr11	64785774
chr11	64857930
chr11	64906861
chr11	64949453
chr11	64996137
chr11	65021701
chr11	65023054
chr11	65070613
chr11	65094449
chr11	65139377
chr11	65163788
chr11	65177168
chr11	65235888
chr11	65342581
chr11	65452258
chr11	65457231
chr11	65485702
chr11	65513200
chr11	65526290
chr11	65576426
chr11	65605672
chr11	65746905
chr11	65781255
chr11	65792619
chr11	65806677
chr11	65836513
chr11	65869190
chr11	65962967
chr11	66004556
chr11	66140741
chr11	66143368
chr11	66162496
chr11	66367448
chr11	66764068
chr11	66801714
chr11	66841827
chr11	66945195
chr11	66952510
chr11	66993251
chr11	67007188
chr11	67737953
chr11	67796224
chr11	69167476
chr11	69383863
chr11	71469412
chr11	71492250
chr11	71501578
chr11	72765021
chr11	73149974
chr11	73168475
chr11	73176891
chr11	73265613
chr11	73384088
chr11	73394155
chr11	73559876
chr11	73981195
chr11	74337940
chr11	74630474
chr11	74664434
chr11	74788232
chr11	74897064
chr11	75769906
chr11	75833330
chr11	76863023
chr11	77026454
chr11	77209549
chr11	77275280
chr11	77383747
chr11	77528306
chr11	77577240
chr11	77591555
chr11	77592113
chr11	82289583
chr11	82349350
chr11	82460661
chr11	82545897
chr11	82582316
chr11	82674705
chr11	82675076
chr11	84872754
chr11	85017327
chr11	85053050
chr11	85141743
chr11	85212656
chr11	85633414
chr11	85690948
chr11	86810277
chr11	87710547
chr11	88216807
chr11	91849820
chr11	93114291
chr11	93866825
chr11	94346400
chr11	94524484
chr11	94627263
chr11	95385192
chr11	95389208
chr11	95996646
chr11	98200186
chr11	101291047
chr11	101524808
chr11	101682908
chr11	101693269
chr11	101722839
chr11	101737195
chr11	101828860
chr11	102180366
chr11	102468230
chr11	102485421
chr11	105398414
chr11	106833735
chr11	106941633
chr11	107497346
chr11	107598843
chr11	107612837
chr11	107873761
chr11	108040831
chr11	110755164
chr11	110978127
chr11	111247498
chr11	111255417
chr11	111302744
chr11	111462745
chr11	113149816
chr11	113536123
chr11	113559295
chr11	113776556
chr11	113815263
chr11	116148939
chr11	116703712
chr11	117363174
chr11	117422264
chr11	117427599
chr11	117600963
chr11	117617584
chr11	117628254
chr11	117692733
chr11	117714826
chr11	117735526
chr11	117777238
chr11	117942059
chr11	118075624
chr11	118081160
chr11	118246126
chr11	118252981
chr11	118332578
chr11	118374062
chr11	118394299
chr11	118406928
chr11	118443762
chr11	118460765
chr11	118471398
chr11	118477896
chr11	118710417
chr11	118757565
chr11	120668456
chr11	120828943
chr11	120835537
chr11	120840549
chr11	120844169
chr11	120857965
chr11	122072765
chr11	122119992
chr11	122438028
chr11	122459774
chr11	123998038
chr11	124048987
chr11	124122006
chr11	124486940
chr11	124967663
chr11	125438287
chr11	125586502
chr11	125644025
chr11	125679206
chr11	127677764
chr11	127699961
chr11	127797880
chr11	127846651
chr11	127851996
chr11	127897908
chr11	128092016
chr11	128102027
chr11	129229229
chr11	129378031
chr11	129444991
chr11	130291689
chr11	132094545
chr11	133320483
chr11	133599733
chr12	369110
chr12	381010
chr12	654011
chr12	664973
chr12	929315
chr12	1102518
chr12	1257541
chr12	1632388
chr12	1670369
chr12	1984033
chr12	2763653
chr12	2792084
chr12	3852853
chr12	3942158
chr12	4122421
chr12	4300386
chr12	4518176
chr12	6353148
chr12	6431535
chr12	6441438
chr12	6450074
chr12	6514700
chr12	6642784
chr12	6669064
chr12	6703419
chr12	6733199
chr12	6768969
chr12	6831652
chr12	6917481
chr12	6940986
chr12	6950349
chr12	6995961
chr12	7980034
chr12	8014555
chr12	8070382
chr12	8126042
chr12	9327194
chr12	9692126
chr12	9694782
chr12	9804808
chr12	9808821
chr12	9858143
chr12	12025593
chr12	12311552
chr12	12394449
chr12	12401292
chr12	12413113
chr12	12510490
chr12	12526559
chr12	12655988
chr12	12700322
chr12	12761557
chr12	12769709
chr12	12852613
chr12	12857556
chr12	14815302
chr12	14818504
chr12	14847922
chr12	14993094
chr12	15005800
chr12	15926563
chr12	19483730
chr12	20217415
chr12	20595682
chr12	21545961
chr12	21702019
chr12	22487801
chr12	22588750
chr12	25429846
chr12	26982648
chr12	27058630
chr12	27066757
chr12	27568363
chr12	27754984
chr12	29425495
chr12	31370333
chr12	31703443
chr12	31726535
chr12	31773184
chr12	31793625
chr12	31848367
chr12	31919725
chr12	31940934
chr12	32003474
chr12	32723399
chr12	34066577
chr12	34263917
chr12	34732744
chr12	36694874
chr12	36701272
chr12	36731081
chr12	36830084
chr12	36996844
chr12	38123179
chr12	39412488
chr12	39429682
chr12	42438871
chr12	43769150
chr12	44670879
chr12	44895252
chr12	44898238
chr12	44949163
chr12	45052812
chr12	45063289
chr12	45896411
chr12	45957094
chr12	46040964
chr12	46504523
chr12	46643634
chr12	46786391
chr12	46837518
chr12	46878424
chr12	47362159
chr12	47396823
chr12	47545904
chr12	47584120
chr12	47698898
chr12	47740865
chr12	47790944
chr12	47869199
chr12	48248159
chr12	48303257
chr12	48343207
chr12	48421594
chr12	48705780
chr12	48765213
chr12	48791979
chr12	49080828
chr12	49093226
chr12	49444000
chr12	49728370
chr12	49763676
chr12	49898122
chr12	49919130
chr12	49999099
chr12	50021503
chr12	50049232
chr12	50716880
chr12	50749774
chr12	50835665
chr12	51325655
chr12	51550728
chr12	51661069
chr12	51686240
chr12	51860703
chr12	51948216
chr12	51968016
chr12	51975549
chr12	51979712
chr12	52059994
chr12	52121707
chr12	52132048
chr12	52180705
chr12	52356254
chr12	52407681
chr12	52960799
chr12	53005098
chr12	53048920
chr12	53093527
chr12	53177620
chr12	53664869
chr12	54497868
chr12	54509674
chr12	54607142
chr12	54609643
chr12	54654125
chr12	54721981
chr12	54727341
chr12	54784472
chr12	54798186
chr12	54808178
chr12	54832605
chr12	54838018
chr12	54946909
chr12	55014025
chr12	55018943
chr12	55040462
chr12	55144526
chr12	55148487
chr12	55310459
chr12	55316740
chr12	55326053
chr12	55326389
chr12	55405405
chr12	55758810
chr12	55768578
chr12	56111099
chr12	56139302
chr12	56159996
chr12	56168058
chr12	56200537
chr12	56374162
chr12	56432683
chr12	56462796
chr12	56616184
chr12	56621405
chr12	59476947
chr12	60940294
chr12	61146884
chr12	62902348
chr12	63084297
chr12	63345823
chr12	63349403
chr12	63354843
chr12	63364875
chr12	63849593
chr12	64810805
chr12	64856723
chr12	64968354
chr12	65948862
chr12	66163593
chr12	66310966
chr12	66856052
chr12	67219382
chr12	67271892
chr12	67290696
chr12	67355679
chr12	67366909
chr12	67837254
chr12	68040238
chr12	68265588
chr12	68791581
chr12	70434922
chr12	70519874
chr12	72283779
chr12	72888021
chr12	73535045
chr12	73633618
chr12	74158712
chr12	74191712
chr12	74764730
chr12	75476904
chr12	75745001
chr12	81276309
chr12	86985186
chr12	86986459
chr12	87060115
chr12	87620554
chr12	88163209
chr12	88270672
chr12	89583749
chr12	89696667
chr12	89773860
chr12	90795132
chr12	90896217
chr12	90948718
chr12	91063768
chr12	91278687
chr12	91281716
chr12	91316677
chr12	91321891
chr12	91512005
chr12	92360219
chr12	92488899
chr12	92595279
chr12	93020322
chr12	93377821
chr12	93921586
chr12	93991560
chr12	94135722
chr12	94212361
chr12	94391996
chr12	94776827
chr12	94953600
chr12	95159973
chr12	95352290
chr12	95363875
chr12	95407468
chr12	95419176
chr12	97434461
chr12	97511573
chr12	97563018
chr12	99118698
chr12	100741972
chr12	102644718
chr12	102847989
chr12	102875190
chr12	102883750
chr12	103056058
chr12	103133745
chr12	103204840
chr12	104025577
chr12	104154189
chr12	105219925
chr12	105275698
chr12	105666036
chr12	106603594
chr12	107433120
chr12	107479347
chr12	107551875
chr12	107649355
chr12	107974713
chr12	108015724
chr12	108399868
chr12	108495495
chr12	108636030
chr12	108802777
chr12	108822448
chr12	108921323
chr12	108970821
chr12	109372631
chr12	109390446
chr12	109424354
chr12	110357118
chr12	110608303
chr12	110764195
chr12	111031013
chr12	111047749
chr12	111331751
chr12	111900618
chr12	112119288
chr12	112143663
chr12	112888493
chr12	115985498
chr12	116112624
chr12	117058341
chr12	117295369
chr12	117298570
chr12	118590221
chr12	118911449
chr12	118929636
chr12	118934615
chr12	119009385
chr12	119123337
chr12	119150675
chr12	119174389
chr12	119187873
chr12	119214332
chr12	119224465
chr12	119239735
chr12	119360187
chr12	119368668
chr12	119391986
chr12	119418369
chr12	119503669
chr12	119608827
chr12	119850881
chr12	119938630
chr12	120103653
chr12	120146964
chr12	120162958
chr12	120274776
chr12	120322301
chr12	120513039
chr12	120594278
chr12	120609425
chr12	120712239
chr12	120716599
chr12	120810918
chr12	120811439
chr12	120840763
chr12	120976774
chr12	121276467
chr12	121316989
chr12	121551296
chr12	121577706
chr12	121803107
chr12	121939049
chr12	122002989
chr12	122025265
chr12	122273845
chr12	122487359
chr12	122634814
chr12	122652511
chr12	122684269
chr12	123965182
chr12	123967830
chr12	124039637
chr12	126216527
chr12	130562006
chr12	130586983
chr12	130979714
chr12	131194944
chr12	131229515
chr12	131236492
chr12	131774151
chr12	131797248
chr12	131915585
chr12	132073067
chr12	132123932
chr12	132166822
chr12	132217290
chr13	19255179
chr13	19948239
chr13	20612518
chr13	21076478
chr13	23361646
chr13	23723782
chr13	23726855
chr13	23737308
chr13	23744015
chr13	24395076
chr13	24759664
chr13	26644125
chr13	26723513
chr13	26922689
chr13	26931740
chr13	28131326
chr13	29407891
chr13	29844354
chr13	29846831
chr13	29849265
chr13	30080278
chr13	30089962
chr13	30216677
chr13	30634061
chr13	30672110
chr13	31787646
chr13	31900282
chr13	32010919
chr13	33014854
chr13	33290138
chr13	35167039
chr13	35599504
chr13	36471480
chr13	36473051
chr13	36885948
chr13	39663109
chr13	39860959
chr13	39957949
chr13	40138690
chr13	40243271
chr13	40393952
chr13	40929449
chr13	40937510
chr13	40965246
chr13	41743888
chr13	41827463
chr13	42495694
chr13	42529957
chr13	43249091
chr13	44390200
chr13	44461640
chr13	44813317
chr13	44839691
chr13	44937001
chr13	45319932
chr13	45524926
chr13	45644772
chr13	45654418
chr13	45768113
chr13	46655959
chr13	47087425
chr13	47510220
chr13	47567353
chr13	47964815
chr13	48034634
chr13	48916426
chr13	49079368
chr13	49265114
chr13	50382149
chr13	50925165
chr13	51086796
chr13	51275619
chr13	51423097
chr13	51666602
chr13	51927600
chr13	52124985
chr13	54353346
chr13	56694578
chr13	64585939
chr13	65088345
chr13	67249769
chr13	67750190
chr13	67884696
chr13	69698620
chr13	72199871
chr13	72254284
chr13	73187778
chr13	73238376
chr13	73457278
chr13	73628055
chr13	75021607
chr13	76463719
chr13	76801407
chr13	78131274
chr13	78878489
chr13	78923929
chr13	80266291
chr13	81807593
chr13	90041210
chr13	91204364
chr13	94046431
chr13	94051889
chr13	95127398
chr13	96883417
chr13	97895804
chr13	97904546
chr13	97926899
chr13	97935292
chr13	98445320
chr13	98449368
chr13	98650862
chr13	98746889
chr13	98765237
chr13	98806653
chr13	98822465
chr13	98870593
chr13	98884838
chr13	98887332
chr13	98948799
chr13	98951628
chr13	101844917
chr13	102046668
chr13	102224015
chr13	102296161
chr13	104158065
chr13	105410554
chr13	105986001
chr13	106018624
chr13	107665980
chr13	108209194
chr13	109236949
chr13	110065983
chr13	110165705
chr13	110627632
chr13	112392381
chr13	112878790
chr13	112912477
chr13	112999379
chr13	113926380
chr13	113932352
chr14	18108145
chr14	19881550
chr14	19993106
chr14	19999832
chr14	20007419
chr14	20151563
chr14	20527881
chr14	20625690
chr14	20807503
chr14	20922294
chr14	20975386
chr14	20994236
chr14	21015130
chr14	21049429
chr14	22095274
chr14	22100614
chr14	22109051
chr14	22128161
chr14	22305765
chr14	22368950
chr14	22458540
chr14	22468660
chr14	22546177
chr14	22574327
chr14	22634190
chr14	22840624
chr14	22860162
chr14	23008706
chr14	23653459
chr14	23680897
chr14	23700168
chr14	23727985
chr14	23734780
chr14	23752577
chr14	23755200
chr14	23771812
chr14	23781804
chr14	23810741
chr14	23968971
chr14	23981978
chr14	30061427
chr14	30161146
chr14	30666854
chr14	30747276
chr14	30959486
chr14	32023539
chr14	33840151
chr14	34470439
chr14	34521921
chr14	34585024
chr14	34661018
chr14	34831344
chr14	34952404
chr14	34955957
chr14	35348363
chr14	35365127
chr14	35859673
chr14	38714055
chr14	38768225
chr14	38971413
chr14	40754756
chr14	41482623
chr14	44501006
chr14	44674908
chr14	44792453
chr14	45959827
chr14	49122993
chr14	49389398
chr14	49399507
chr14	49405018
chr14	49429529
chr14	49619730
chr14	49652959
chr14	50069219
chr14	50482756
chr14	50956324
chr14	51383809
chr14	51397031
chr14	51526040
chr14	52088994
chr14	52147987
chr14	52243504
chr14	52328050
chr14	52689973
chr14	53933364
chr14	53977919
chr14	54025477
chr14	54588064
chr14	54948329
chr14	55343711
chr14	55654913
chr14	56116280
chr14	56915259
chr14	57112426
chr14	57736491
chr14	57834685
chr14	57964134
chr14	59628314
chr14	60874511
[truncated: 4,879 more rows]
