# Supplementary material for: RFECS: A Random-Forest Based Algorithm for Enhancer Identification from Chromatin State
Source: PLoS Comput Biol. 2013 Mar 14;9(3):e1002968. doi: 10.1371/journal.pcbi.1002968 (PMC3597546; doi:10.1371/journal.pcbi.1002968)
Supplement: Table S9 — p300 binding sites in CD4 T-cells overlapping DNase-I hypersensitivity sites and distal to known UCSC and Gencode TSS. (XLS) [file pcbi.1002968.s016.xls]

## Sheet: Sheet1
Table S9.p300 binding sites in CD4 T-cells overlapping DNase-I hypersensitivity sites and distal to known UCSC and Gencode TSS
Chromosome	Location
chr1	2222544
chr1	12156582
chr1	19147590
chr1	23603084
chr1	26484010
chr1	39216106
chr1	39422187
chr1	52875843
chr10	506440
chr10	1146198
chr10	3837564
chr10	3920143
chr10	3981218
chr10	4092151
chr10	6132892
chr10	6245924
chr10	6352447
chr10	6430286
chr10	6580829
chr10	6612300
chr10	6625543
chr10	6689291
chr10	7566609
chr10	8414538
chr10	8520864
chr10	9178481
chr10	11227595
chr10	11260872
chr10	11485271
chr10	11766933
chr10	12530986
chr10	13869199
chr10	14589346
chr10	14665469
chr10	14730595
chr10	17085336
chr10	17105629
chr10	17510829
chr10	22070057
chr10	22765979
chr10	22995555
chr10	25223880
chr10	26777850
chr10	28663372
chr10	29988222
chr10	30010832
chr10	30863662
chr10	32661389
chr10	33463227
chr10	33468197
chr10	35776813
chr10	41685084
chr10	41699917
chr10	41852761
chr10	41862183
chr10	43177663
chr10	43271096
chr10	45285822
chr10	48047680
chr10	63613310
chr10	69042947
chr10	69193927
chr10	69279255
chr10	70855784
chr10	71604060
chr10	72744122
chr10	73157614
chr10	73178732
chr10	73678735
chr10	73691044
chr10	73727240
chr10	73761400
chr10	75309590
chr10	76016031
chr10	76019190
chr10	79266304
chr10	80753225
chr10	81937409
chr10	82237679
chr10	82255372
chr10	86083918
chr10	88149800
chr10	88335407
chr10	90135401
chr10	103822887
chr10	104424011
chr10	105428081
chr10	112164350
chr10	112610571
chr10	112614708
chr10	115711432
chr10	116290926
chr10	116551229
chr10	120448160
chr10	121018502
chr10	121055800
chr10	121251984
chr10	124990862
chr10	126398254
chr10	127720520
chr10	134111280
chr11	259533
chr11	397101
chr11	578306
chr11	718150
chr11	1041239
chr11	2915618
chr11	2992256
chr11	3319265
chr11	3925065
chr11	4046970
chr11	8667170
chr11	9228577
chr11	9342648
chr11	11127935
chr11	11134664
chr11	12202851
chr11	13847379
chr11	13918921
chr11	14053400
chr11	14556839
chr11	14743526
chr11	18361644
chr11	34152620
chr11	35018454
chr11	35023567
chr11	35060834
chr11	35061838
chr11	35144386
chr11	35195291
chr11	35225621
chr11	35309238
chr11	44547575
chr11	45333509
chr11	45804859
chr11	46649234
chr11	47213072
chr11	47979994
chr11	48034202
chr11	48820344
chr11	51447908
chr11	54765890
chr11	57316376
chr11	60510313
chr11	60528995
chr11	60566493
chr11	60585448
chr11	60607765
chr11	60636019
chr11	61549783
chr11	62075954
chr11	62084787
chr11	62165047
chr11	63055693
chr11	63091170
chr11	64996137
chr11	65177168
chr11	65342581
chr11	65452258
chr11	65513200
chr11	65605672
chr11	65746905
chr11	65806677
chr11	65836513
chr11	66764068
chr11	66801714
chr11	66841827
chr11	73168475
chr11	73384088
chr11	73394155
chr11	74630474
chr11	74664434
chr11	74897064
chr11	77591555
chr11	77592113
chr11	82349350
chr11	84872754
chr11	85141743
chr11	85212656
chr11	88216807
chr11	94627263
chr11	95385192
chr11	95389208
chr11	101682908
chr11	101737195
chr11	107612837
chr11	111302744
chr11	113536123
chr11	113559295
chr11	117422264
chr11	117427599
chr11	117617584
chr11	117692733
chr11	117714826
chr11	118075624
chr11	118081160
chr11	118246126
chr11	118252981
chr11	120835537
chr11	120840549
chr11	120844169
chr11	120857965
chr11	122072765
chr11	122119992
chr11	122459774
chr11	124122006
chr11	127677764
chr11	127699961
chr11	127797880
chr11	127846651
chr11	127851996
chr11	128092016
chr11	128102027
chr11	129229229
chr11	132094545
chr12	654011
chr12	664973
chr12	1102518
chr12	1257541
chr12	1632388
chr12	3942158
chr12	4122421
chr12	6441438
chr12	6917481
chr12	8014555
chr12	8070382
chr12	9694782
chr12	9808821
chr12	9858143
chr12	12025593
chr12	12510490
chr12	12526559
chr12	12700322
chr12	12852613
chr12	20595682
chr12	22487801
chr12	25429846
chr12	31726535
chr12	31919725
chr12	34263917
chr12	34732744
chr12	36731081
chr12	36830084
chr12	44895252
chr12	44898238
chr12	45063289
chr12	45957094
chr12	46040964
chr12	46504523
chr12	46878424
chr12	47740865
chr12	49999099
chr12	50021503
chr12	50049232
chr12	50835665
chr12	51325655
chr12	51550728
chr12	51661069
chr12	51968016
chr12	53048920
chr12	53093527
chr12	54727341
chr12	55144526
chr12	63349403
chr12	63354843
chr12	63364875
chr12	64968354
chr12	66163593
chr12	66310966
chr12	66856052
chr12	67219382
chr12	67271892
chr12	67355679
chr12	67837254
chr12	73633618
chr12	93020322
chr12	119150675
chr12	120712239
chr13	19948239
chr13	23737308
chr13	26931740
chr13	30080278
chr13	33014854
chr13	39663109
chr13	39860959
chr13	39957949
chr13	40965246
chr13	41827463
chr13	44390200
chr13	44839691
chr13	45319932
chr13	45644772
chr13	45768113
chr13	48034634
chr13	49079368
chr13	51086796
chr13	51423097
chr13	73187778
chr13	73238376
chr13	73457278
chr13	78923929
chr13	97895804
chr13	97926899
chr13	97935292
chr13	98445320
chr13	98449368
chr13	98806653
chr13	98870593
chr13	98884838
chr13	98887332
chr13	110627632
chr13	113926380
chr13	113932352
chr14	20151563
chr14	20625690
chr14	20994236
chr14	22095274
chr14	22100614
chr14	22109051
chr14	22546177
chr14	30061427
chr14	32023539
chr14	34470439
chr14	34952404
chr14	34955957
chr14	38768225
chr14	49399507
chr14	49405018
chr14	49619730
chr14	50956324
chr14	55343711
chr14	60874511
chr14	60879147
chr14	61013506
chr14	61199174
chr14	63186970
chr14	63400997
chr14	64824386
chr14	65383664
chr14	67747261
chr14	68044368
chr14	68222416
chr14	70354357
chr14	70856959
chr14	74786140
chr14	74795649
chr14	74811491
chr14	75102601
chr14	76304618
chr14	76492887
chr14	76497995
chr14	76576532
chr14	80467340
chr14	80706567
chr14	87307421
chr14	89257142
chr14	89919496
chr14	90558767
chr14	90713576
chr14	90766007
chr14	90903530
chr14	90933757
chr14	91406226
chr14	92151749
chr14	93514536
chr14	93538129
chr14	93672980
chr14	95662725
chr14	97139024
chr14	97760084
chr14	97980365
chr14	98468265
chr14	98520844
chr14	99604953
chr14	99729114
chr14	100176689
chr14	101243557
chr14	101258118
chr14	101484249
chr14	102614531
chr14	103927580
chr14	104353525
chr14	104597114
chr14	105019400
chr15	18821871
chr15	19962520
chr15	20010686
chr15	29208873
chr15	29286921
chr15	29346049
chr15	29440859
chr15	29514510
chr15	36732525
chr15	36750239
chr15	38447666
chr15	38983667
chr15	40570734
chr15	43358827
chr15	50335993
chr15	50411164
chr15	50561697
chr15	50809881
chr15	54325667
chr15	57831463
chr15	57894187
chr15	58056204
chr15	58207140
chr15	58439296
chr15	58643231
chr15	58924357
chr15	61271380
chr15	61546119
chr15	61559089
chr15	61577250
chr15	61972175
chr15	62090209
chr15	62509658
chr15	62810689
chr15	62973270
chr15	65919790
chr15	67793750
chr15	67838604
chr15	68380123
chr15	68571841
chr15	72856926
chr15	75623001
chr15	76841123
chr15	79354600
chr15	83079540
chr15	84012351
chr15	84051355
chr15	87249036
chr15	88575445
chr15	88706512
chr15	88938869
chr15	89182541
chr15	90202046
chr15	91153556
chr15	91176016
chr15	91226681
chr15	91248536
chr15	98954836
chr16	315219
chr16	317559
chr16	2013334
chr16	2477484
chr16	2858637
chr16	2865079
chr16	3065257
chr16	3114679
chr16	4297839
chr16	4496616
chr16	8557791
chr16	11234638
chr16	11562215
chr16	11573801
chr16	11716163
chr16	14488446
chr16	15592406
chr16	15674296
chr16	17015374
chr16	17365951
chr16	17371219
chr16	22110288
chr16	22114623
chr16	22276957
chr16	27088724
chr16	27154384
chr16	27286696
chr16	28060104
chr16	28088053
chr16	29067993
chr16	29746067
chr16	30377792
chr16	30470728
chr16	30517157
chr16	30547707
chr16	31788542
chr16	33857771
chr16	33860673
chr16	33870360
chr16	44944218
chr16	44971438
chr16	44993021
chr16	46096248
chr16	48055208
chr16	49194278
chr16	52049298
chr16	52110328
chr16	55675806
chr16	55726547
chr16	55892166
chr16	56121571
chr16	65108344
chr16	65113741
chr16	65464644
chr16	66112649
chr16	67009485
chr16	68972762
chr16	70437333
chr16	73666784
chr16	74108919
chr16	75827590
chr16	79172021
chr16	80207634
chr16	80224031
chr16	81246663
chr16	83185477
chr16	83243913
chr16	83646682
chr16	85979629
chr16	86370413
chr16	87214096
chr16	87295034
chr16	87709555
chr16	87835386
chr16	87850885
chr16	87910073
chr16	88003339
chr16	88099572
chr16	88187957
chr17	1048321
chr17	1144421
chr17	1313432
chr17	1721889
chr17	2109873
chr17	2664868
chr17	3561199
chr17	3646718
chr17	3761480
chr17	7299590
chr17	7695945
chr17	7983081
chr17	8000757
chr17	8017692
chr17	8237911
chr17	8743265
chr17	8785602
chr17	8798580
chr17	14050049
chr17	16130187
chr17	16379862
chr17	16428461
chr17	16755867
chr17	16963690
chr17	17684087
chr17	19296299
chr17	19357890
chr17	19616062
chr17	22953028
chr17	23159362
chr17	24496659
chr17	25715091
chr17	26160351
chr17	26661640
chr17	26860115
chr17	28173798
chr17	30374037
chr17	30402534
chr17	30502365
chr17	30528765
chr17	30565419
chr17	30664431
chr17	34648499
chr17	35031930
chr17	35164280
chr17	35179928
chr17	35210515
chr17	35223529
chr17	35518126
chr17	35523071
chr17	35732769
chr17	35943460
chr17	35951003
chr17	35992252
chr17	36012823
chr17	36017617
chr17	36022782
chr17	36748867
chr17	37743311
chr17	37932966
chr17	38794192
chr17	40818883
chr17	41700011
chr17	42568970
chr17	42569565
chr17	42589377
chr17	43938419
chr17	44625272
chr17	45172294
chr17	45181275
chr17	45250555
chr17	46860409
chr17	48538325
chr17	52873547
chr17	53036706
chr17	53749979
chr17	53776992
chr17	54091582
chr17	54743467
chr17	54760188
chr17	54873128
chr17	55218763
chr17	56571547
chr17	58156165
chr17	59457044
chr17	59779400
chr17	60392542
chr17	60466443
chr17	60549935
chr17	61673104
chr17	61853139
chr17	61993947
chr17	62848643
chr17	62867677
chr17	63152293
chr17	63446600
chr17	63690773
chr17	63713163
chr17	63864424
chr17	69230179
chr17	70287954
chr17	70544530
chr17	70750227
chr17	71659698
chr17	71707357
chr17	72023465
chr17	72030981
chr17	72179468
chr17	72505933
chr17	72635839
chr17	72912674
chr17	72949477
chr17	73395753
chr17	73466082
chr17	73780475
chr17	73797656
chr17	74256561
chr17	74267270
chr17	74325069
chr17	75585369
chr17	75854161
chr17	76043225
chr17	76606580
chr17	76683475
chr17	77066021
chr17	77752187
chr17	77757450
chr17	77849510
chr17	78415217
chr17	78434034
chr18	820631
chr18	2626777
chr18	3287602
chr18	9063841
chr18	9081203
chr18	13455185
chr18	16774193
chr18	18905486
chr18	19065379
chr18	22049747
chr18	31220778
chr18	43529700
chr18	44623136
chr18	44777633
chr18	48573145
chr18	54888826
chr18	55723215
chr18	58956453
chr18	59018319
chr18	66491043
chr18	66501649
chr18	72903626
chr18	72947520
chr18	72981757
chr18	75266819
chr18	76034629
chr19	440117
chr19	462355
chr19	860382
chr19	947697
chr19	981727
chr19	1195588
chr19	2036472
chr19	2550596
chr19	2901697
chr19	3106328
chr19	3763576
chr19	3941368
chr19	4060017
chr19	5090477
chr19	5913253
chr19	6813938
chr19	7623195
chr19	7629406
chr19	9767986
chr19	10068058
chr19	10207914
chr19	10267927
chr19	10360744
chr19	10703444
chr19	10726944
chr19	10731648
chr19	10769411
chr19	11251716
chr19	12467262
chr19	12754161
chr19	13139716
chr19	13818507
chr19	13852027
chr19	13958339
chr19	14053256
chr19	14338586
chr19	14341711
chr19	14347252
chr19	14478989
chr19	14494036
chr19	14523457
chr19	15807997
chr19	16042459
chr19	16302415
chr19	16340970
chr19	16343508
chr19	16556258
chr19	16560275
chr19	17097713
chr19	17995791
chr19	18016957
chr19	18091248
chr19	18262332
chr19	18468230
chr19	19461063
chr19	19561766
chr19	19569778
chr19	19577984
chr19	23975535
chr19	23976609
chr19	32424567
chr19	32456386
chr19	32633261
chr19	34863425
chr19	35014059
chr19	35027961
chr19	36396965
chr19	38359655
chr19	39401218
chr19	39452963
chr19	39533183
chr19	40156084
chr19	40389432
chr19	40393761
chr19	40394868
chr19	40396760
chr19	40423189
chr19	40645716
chr19	40758554
chr19	41114443
chr19	43952442
chr19	44256220
chr19	44584208
chr19	46319007
chr19	46342368
chr19	46525832
chr19	46729731
chr19	47141606
chr19	47395270
chr19	47464347
chr19	47492209
chr19	47646659
chr19	48635345
chr19	48666508
chr19	48671518
chr19	48758820
chr19	49965911
chr19	50645851
chr19	50680567
chr19	51807509
chr19	52439558
chr19	52795661
chr19	53528160
chr19	54664336
chr19	54696233
chr19	54763421
chr19	55182322
chr19	56636789
chr19	58118449
chr19	60209366
chr19	63604821
chr2	428232
chr2	25349903
chr2	30342771
chr2	42186193
chr2	43275552
chr2	68910053
chr2	70223416
chr2	111332733
chr2	112662492
chr2	120169360
chr2	120651118
chr2	120706459
chr2	122173615
chr2	127555927
chr2	127882160
chr2	204314132
chr2	204600256
chr2	212782319
chr2	232235494
chr2	234999474
chr2	239913632
chr2	239956537
chr20	259388
chr20	1432439
chr20	3022149
chr20	3050110
chr20	3740455
chr20	3966838
chr20	4798263
chr20	4985705
chr20	5007350
chr20	5643322
chr20	5666135
chr20	23866123
chr20	23956055
chr20	26267428
chr20	29664486
chr20	30283556
chr20	30438892
chr20	31023943
chr20	31421989
chr20	31676610
chr20	32760839
chr20	33819641
chr20	34046578
chr20	34618582
chr20	34657734
chr20	35006225
chr20	39755619
chr20	42012440
chr20	42017659
chr20	42131557
chr20	42446581
chr20	45789731
chr20	48197065
chr20	48868536
chr20	49454868
chr20	49551095
chr20	50460401
chr20	51693216
chr20	51885629
chr20	51889666
chr20	55406967
chr20	55441494
chr20	56218560
chr20	56669935
chr20	57158601
chr20	57168131
chr20	60126388
chr20	60754047
chr20	61737276
chr21	26149997
chr21	29296960
chr21	29743640
chr21	31427240
chr21	31649010
chr21	33656479
chr21	35257363
chr21	35321058
chr21	36435910
chr21	36468210
chr21	36592538
chr21	37858250
chr21	38538848
chr21	41754551
chr21	42481583
chr21	42521507
chr21	42526937
chr21	42531961
chr21	42708476
chr21	42754205
chr21	43040144
chr21	43470010
chr21	43891175
chr21	44309926
chr21	44398462
chr21	44440700
chr21	44488497
chr21	45323478
chr21	45396789
chr21	45399352
chr21	45851626
chr21	45859904
chr22	23788510
chr22	30012503
chr22	38255250
chr22	41012296
chr22	49255257
chr3	4838822
chr3	4862600
chr3	5036404
chr3	8128194
chr3	8374065
chr3	10215876
chr3	10259233
chr3	11640856
chr3	13883367
chr3	15288457
chr3	15394846
chr3	15664303
chr3	16328667
chr3	18516005
chr3	25484023
chr3	30370750
chr3	30672010
chr3	30675329
chr3	32314104
chr3	32474687
chr3	32476875
chr3	32964409
chr3	32980462
chr3	36909625
chr3	39304932
chr3	41134109
chr3	42897653
chr3	43263614
chr3	43394881
chr3	43406376
chr3	44456502
chr3	45054404
chr3	45134577
chr3	45886899
chr3	46081965
chr3	46555453
chr3	46964811
chr3	47054656
chr3	47073825
chr3	48520292
chr3	50601145
chr3	52262558
chr3	52730277
chr3	56933065
chr3	59412309
chr3	59971719
chr3	68189676
chr3	71182477
chr3	71219086
chr3	71359010
chr3	71504988
chr3	71576306
chr3	99241047
chr3	110008113
chr3	111516228
chr3	112749484
chr3	112818077
chr3	114207411
chr3	121348815
chr3	121760662
chr3	129314439
chr3	129518193
chr3	142468567
chr3	142513373
chr3	142571786
chr3	142700542
chr3	154422415
chr3	171064067
chr3	171234077
chr3	178560557
chr3	178848385
chr3	184713980
chr3	184716949
chr3	188331453
chr3	190525330
chr3	195884788
chr3	196758498
chr4	765596
chr4	1039780
chr4	38627567
chr4	97201670
chr5	445847
chr5	517169
chr5	725955
chr5	812516
chr5	965851
chr5	1589628
chr5	1846083
chr5	14863088
chr5	14979218
chr5	35687252
chr5	35797680
chr5	35847179
chr5	35866684
chr5	39246057
chr5	39319358
chr5	40446318
chr5	43044588
chr5	43100846
chr5	49508106
chr5	52057160
chr5	55390586
chr5	55480341
chr5	58459342
chr5	60663848
chr5	60740345
chr5	64367382
chr5	66538742
chr5	66547577
chr5	67587674
chr5	67611802
chr5	67766033
chr5	71182601
chr5	71640156
chr5	72719622
chr5	72851442
chr5	74391656
chr5	75805452
chr5	76106212
chr5	76487210
chr5	79982957
chr5	80338808
chr5	81183596
chr5	81688695
chr5	94993761
chr5	95208611
chr5	96230510
chr5	98293232
chr5	109285466
chr5	109417999
chr5	110594321
chr5	110894096
chr5	118704561
chr5	130573320
chr5	130616660
chr5	130644970
chr5	130743443
chr5	130746151
chr5	131820227
chr5	131830462
chr5	132183891
chr5	133403358
chr5	133450770
chr5	138018001
chr5	138818767
chr5	139147371
chr5	140070988
chr5	141455671
chr5	141583552
chr5	142362315
chr5	143547739
chr5	143549802
chr5	148600334
chr5	148731243
chr5	149795995
chr5	150571674
chr5	150573986
chr5	153581511
chr5	156532170
chr5	156553395
chr5	156593340
chr5	156631442
chr5	156963126
chr5	158772036
chr5	169638285
chr5	171426450
chr5	171534354
chr5	171653256
chr5	172124933
chr5	174893905
chr5	175056288
chr5	175956527
chr5	176476603
chr5	177476413
chr5	180548675
chr5	180551568
chr6	180985
chr6	2794128
chr6	12169154
chr6	12246682
chr6	16431026
chr6	16590030
chr6	20428259
chr6	25044168
chr6	25060116
chr6	25100155
chr6	25123648
chr6	26100848
chr6	26582500
chr6	27829223
chr6	28180552
chr6	28960236
chr6	29725813
chr6	30040806
chr6	30758518
chr6	31644566
chr6	33060667
chr6	33419736
chr6	33646682
chr6	34258641
chr6	34299955
chr6	35378824
chr6	36378356
chr6	36499222
chr6	37094483
chr6	37127244
chr6	37578562
chr6	41636831
chr6	42846946
chr6	43300262
chr6	43459649
chr6	46087384
chr6	52363296
chr6	53334531
chr6	53520865
chr6	58885652
chr6	88508724
chr6	90719443
chr6	91000538
chr6	91040983
chr6	91117343
chr6	91180515
chr6	106672331
chr6	107075468
chr6	108144824
chr6	108164921
chr6	108970049
chr6	112179233
chr6	112417679
chr6	119600299
chr6	127902519
chr6	128335026
chr6	130047042
chr6	130876857
chr6	130938980
chr6	131562711
chr6	131644516
chr6	133635788
chr6	134603663
chr6	134610120
chr6	135450737
chr6	136242964
chr6	137116710
chr6	138078650
chr6	138080406
chr6	138162995
chr6	139524135
chr6	139686560
chr6	143205670
chr6	143276562
chr6	143289805
chr6	144579033
chr6	149795055
chr6	159194525
chr7	624804
chr7	105277272
chr7	138971305
chr8	1695877
chr8	1727535
chr8	2063183
chr8	6563291
chr8	8960884
chr8	10911441
chr8	11353043
chr8	19377457
chr8	19398970
chr8	19413108
chr8	19598340
chr8	20337268
chr8	20395233
chr8	21923750
chr8	22445384
chr8	22487960
chr8	23133107
chr8	28314667
chr8	28333231
chr8	29322029
chr8	29372629
chr8	29443054
chr8	29468975
chr8	29578708
chr8	30111016
chr8	30700102
chr8	33531331
chr8	33568292
chr8	38387514
chr8	38915287
chr8	42118330
chr8	42493469
chr8	43215066
chr8	43887475
chr8	46975657
chr8	50024853
chr8	61868141
chr8	61883079
chr8	62004499
chr8	67026560
chr8	67188263
chr8	67188979
chr8	67608569
chr8	70764950
chr8	81160011
chr8	81305748
chr8	82168908
chr8	95073122
chr8	95986848
chr8	100577313
chr8	101491666
chr8	101512347
chr8	101533618
chr8	101891275
chr8	101908528
chr8	102218902
chr8	116729736
chr8	118521534
chr8	121831091
chr8	123880642
chr8	124238728
chr8	124602093
chr8	125725682
chr8	127023607
chr8	128278471
chr8	128468666
chr8	129062848
chr8	129074674
chr8	131149868
chr8	131526308
chr8	134580794
chr8	134608296
chr8	141543915
chr8	141670837
chr8	141676413
chr8	141870231
chr8	141918497
chr8	142387637
chr8	144435236
chr8	144615629
chr8	144670025
chr8	145010648
chr8	145082731
chr8	145882326
chr8	146075103
chr9	6671603
chr9	7966577
chr9	19447569
chr9	33405756
chr9	34889742
chr9	36142032
chr9	36756039
chr9	69266335
chr9	92904159
chr9	131215889
chrX	71242185
