# Supplementary material for: RFECS: A Random-Forest Based Algorithm for Enhancer Identification from Chromatin State
Source: PLoS Comput Biol. 2013 Mar 14;9(3):e1002968. doi: 10.1371/journal.pcbi.1002968 (PMC3597546; doi:10.1371/journal.pcbi.1002968)
Supplement: Table S10 — CBP binding sites determined by MACS. (XLS) [file pcbi.1002968.s017.xls]

## Sheet: Sheet1
Table S10.CBP binding sites determined by MACS
Chromosome	Location
chr1	554998
chr1	703950
chr1	752688
chr1	830046
chr1	884481
chr1	926135
chr1	938766
chr1	941503
chr1	994558
chr1	1041554
chr1	1047506
chr1	1126830
chr1	1157266
chr1	1199315
chr1	1233908
chr1	1249912
chr1	1275099
chr1	1296823
chr1	1300617
chr1	1324770
chr1	1332549
chr1	1396925
chr1	1437227
chr1	1500215
chr1	1540587
chr1	1555691
chr1	1580385
chr1	1614088
chr1	1614462
chr1	1645697
chr1	1812398
chr1	1830644
chr1	1840791
chr1	1940834
chr1	2054607
chr1	2110805
chr1	2120607
chr1	2149078
chr1	2155793
chr1	2158735
chr1	2177375
chr1	2212172
chr1	2222604
chr1	2313068
chr1	2333897
chr1	2447580
chr1	2470155
chr1	2499734
chr1	2506886
chr1	2564571
chr1	2939540
chr1	3223161
chr1	3438052
chr1	3531257
chr1	3556525
chr1	3702962
chr1	3763804
chr1	3807114
chr1	5050369
chr1	5289190
chr1	5650015
chr1	5975109
chr1	6008971
chr1	6182292
chr1	6218665
chr1	6347860
chr1	6376450
chr1	6443192
chr1	6458339
chr1	6537209
chr1	6562685
chr1	6596225
chr1	6684517
chr1	6767248
chr1	7766786
chr1	7936643
chr1	7944214
chr1	8135499
chr1	8165200
chr1	8297185
chr1	8300771
chr1	8508688
chr1	8684225
chr1	8800357
chr1	8831725
chr1	8861335
chr1	8987946
chr1	9409137
chr1	9411626
chr1	9522078
chr1	9571279
chr1	9609779
chr1	9612457
chr1	9635233
chr1	9700381
chr1	9893229
chr1	9926110
chr1	9933149
chr1	10015355
chr1	10192988
chr1	10381531
chr1	10413055
chr1	10455274
chr1	10457539
chr1	10493778
chr1	10995014
chr1	11020396
chr1	11042753
chr1	11082495
chr1	11245401
chr1	11263817
chr1	11633218
chr1	11663819
chr1	11702284
chr1	11723652
chr1	11788744
chr1	11888424
chr1	11909139
chr1	11917426
chr1	11962870
chr1	12002013
chr1	12107610
chr1	12142674
chr1	12156524
chr1	12161894
chr1	12193378
chr1	12212630
chr1	12432333
chr1	12493482
chr1	12587213
chr1	13864968
chr1	13902037
chr1	13930145
chr1	13948013
chr1	15608592
chr1	15616712
chr1	15725880
chr1	15802744
chr1	15816541
chr1	16035119
chr1	16046769
chr1	16148901
chr1	16175243
chr1	16357229
chr1	16361528
chr1	16405828
chr1	16406129
chr1	16436332
chr1	16551663
chr1	16566157
chr1	16639736
chr1	16698181
chr1	16713180
chr1	16812678
chr1	16843816
chr1	17095243
chr1	17103952
chr1	17113032
chr1	17159914
chr1	17253235
chr1	17411995
chr1	17436333
chr1	17639058
chr1	19101916
chr1	19147698
chr1	19155932
chr1	19273766
chr1	19409447
chr1	19450885
chr1	19511214
chr1	19590176
chr1	19662469
chr1	19795852
chr1	19806104
chr1	19850469
chr1	19887263
chr1	19903748
chr1	20081400
chr1	20707228
chr1	20721585
chr1	20832472
chr1	20860556
chr1	20985883
chr1	21376042
chr1	21493622
chr1	21533496
chr1	21639109
chr1	21953720
chr1	21982774
chr1	22132969
chr1	22156441
chr1	22218278
chr1	22225062
chr1	22230765
chr1	22239073
chr1	22251739
chr1	22651009
chr1	22903630
chr1	23218448
chr1	23543411
chr1	23567524
chr1	23568020
chr1	23603082
chr1	23730425
chr1	23739094
chr1	23753940
chr1	23758649
chr1	23818876
chr1	23890839
chr1	23942511
chr1	23999973
chr1	24024519
chr1	24067484
chr1	24158186
chr1	24179490
chr1	24398572
chr1	24614667
chr1	24680347
chr1	24685709
chr1	24701376
chr1	24705891
chr1	24734240
chr1	24735798
chr1	24786421
chr1	24842037
chr1	24944100
chr1	25047291
chr1	25110360
chr1	25121539
chr1	25124442
chr1	25129553
chr1	25164287
chr1	25184330
chr1	25221598
chr1	25231479
chr1	25356158
chr1	25431616
chr1	25439114
chr1	25446551
chr1	25629495
chr1	25719757
chr1	25733113
chr1	25761775
chr1	25841973
chr1	25875282
chr1	25974161
chr1	25996111
chr1	26010103
chr1	26019096
chr1	26058626
chr1	26094651
chr1	26170621
chr1	26197334
chr1	26304216
chr1	26310823
chr1	26325795
chr1	26328570
chr1	26368903
chr1	26433032
chr1	26479123
chr1	26483948
chr1	26486637
chr1	26505794
chr1	26520800
chr1	26558047
chr1	26577409
chr1	26607789
chr1	26631327
chr1	26672283
chr1	26744832
chr1	26820054
chr1	26876761
chr1	26892256
chr1	26894681
chr1	26943347
chr1	27009329
chr1	27032836
chr1	27089352
chr1	27099550
chr1	27120578
chr1	27159540
chr1	27296649
chr1	27301961
chr1	27311381
chr1	27336431
chr1	27354240
chr1	27433615
chr1	27521289
chr1	27542648
chr1	27568361
chr1	27630188
chr1	27689371
chr1	27721651
chr1	27767753
chr1	27803291
chr1	27843241
chr1	27858883
chr1	27862405
chr1	27924790
chr1	27972227
chr1	28029857
chr1	28057326
chr1	28068212
chr1	28086544
chr1	28113943
chr1	28159253
chr1	28287709
chr1	28368647
chr1	28432069
chr1	28435161
chr1	28458661
chr1	28528049
chr1	28568701
chr1	28705011
chr1	28717307
chr1	28752075
chr1	28781003
chr1	28842230
chr1	28847720
chr1	28867849
chr1	28935897
chr1	29084234
chr1	29086893
chr1	29113642
chr1	29126098
chr1	29381026
chr1	29430028
chr1	30038584
chr1	30964753
chr1	30989223
chr1	30995245
chr1	31002139
chr1	31025044
chr1	31047260
chr1	31311260
chr1	31542306
chr1	31883013
chr1	32002558
chr1	32086795
chr1	32127564
chr1	32182732
chr1	32194420
chr1	32252012
chr1	32311037
chr1	32346205
chr1	32460578
chr1	32488268
chr1	32530181
chr1	32610519
chr1	32632895
chr1	32888678
chr1	33055623
chr1	33219582
chr1	33275275
chr1	33319157
chr1	33337623
chr1	33365493
chr1	33420281
chr1	33588297
chr1	35090997
chr1	35098062
chr1	35104702
chr1	35223495
chr1	35270209
chr1	35431382
chr1	35744485
chr1	35795922
chr1	35879756
chr1	35957069
chr1	36121288
chr1	36169350
chr1	36327038
chr1	36387749
chr1	36399239
chr1	36426542
chr1	36462325
chr1	36545195
chr1	36624310
chr1	36636120
chr1	36659181
chr1	36702606
chr1	37712712
chr1	37718091
chr1	37753061
chr1	37792517
chr1	37834173
chr1	37849953
chr1	37912383
chr1	37928884
chr1	37930685
chr1	38046452
chr1	38097928
chr1	38228382
chr1	38250825
chr1	38797934
chr1	39098225
chr1	39111707
chr1	39216052
chr1	39264534
chr1	39337059
chr1	39422169
chr1	39430541
chr1	39434208
chr1	39435287
chr1	39497051
chr1	39815156
chr1	39891966
chr1	39930022
chr1	39977214
chr1	40037596
chr1	40278792
chr1	40297854
chr1	40335568
chr1	40399574
chr1	40496330
chr1	40553698
chr1	40577231
chr1	40612847
chr1	40624082
chr1	40643131
chr1	40688360
chr1	40769839
chr1	40929869
chr1	41100643
chr1	41242129
chr1	41599384
chr1	41812572
chr1	41989759
chr1	42136638
chr1	42573637
chr1	42694782
chr1	42701482
chr1	42896613
chr1	42920427
chr1	42985631
chr1	43005568
chr1	43055616
chr1	43084718
chr1	43170273
chr1	43197386
chr1	43410525
chr1	43587693
chr1	43597118
chr1	43606348
chr1	43888718
chr1	43945722
chr1	44184964
chr1	44213071
chr1	44268305
chr1	44451649
chr1	44593547
chr1	44912835
chr1	44969368
chr1	44978005
chr1	45013769
chr1	45038688
chr1	45058470
chr1	45224956
chr1	45250421
chr1	45541822
chr1	45542413
chr1	45729581
chr1	45738414
chr1	45760159
chr1	45782276
chr1	45789061
chr1	45925482
chr1	45989031
chr1	46275538
chr1	46485918
chr1	46541546
chr1	46579034
chr1	46766479
chr1	46842541
chr1	46906783
chr1	46957629
chr1	47552510
chr1	47572587
chr1	48055787
chr1	48332112
chr1	51198579
chr1	51206959
chr1	51474442
chr1	51967863
chr1	52117160
chr1	52272101
chr1	52380302
chr1	52604438
chr1	52642793
chr1	52662213
chr1	52875959
chr1	52924618
chr1	52941749
chr1	53160052
chr1	53253175
chr1	53435047
chr1	53439291
chr1	53458589
chr1	53476852
chr1	53651774
chr1	54076877
chr1	54291735
chr1	54438420
chr1	54646044
chr1	54698869
chr1	54726697
chr1	54954097
chr1	55002951
chr1	55453715
chr1	56917986
chr1	57545923
chr1	58785084
chr1	58938392
chr1	59022463
chr1	59051417
chr1	59054699
chr1	59458742
chr1	59808979
chr1	60053304
chr1	61288318
chr1	61315392
chr1	61880166
chr1	61963435
chr1	62021104
chr1	62510486
chr1	62674613
chr1	63022362
chr1	63761485
chr1	63831928
chr1	63889621
chr1	65204312
chr1	65240930
chr1	65313815
chr1	65492832
chr1	65658683
chr1	66453415
chr1	66514614
chr1	66520971
chr1	66569203
chr1	66574466
chr1	66588502
chr1	67163207
chr1	67168577
chr1	67292288
chr1	67409305
chr1	67668771
chr1	67923404
chr1	69767293
chr1	70443923
chr1	70459683
chr1	70593008
chr1	70649146
chr1	71319567
chr1	72500362
chr1	74436520
chr1	74971411
chr1	76024453
chr1	76312849
chr1	77209603
chr1	77457723
chr1	77920974
chr1	77998113
chr1	78017884
chr1	78217470
chr1	78243126
chr1	78884200
chr1	79216724
chr1	79805409
chr1	83746911
chr1	84672169
chr1	84717534
chr1	84812672
chr1	84859323
chr1	84929032
chr1	85101231
chr1	85183115
chr1	85300537
chr1	85478878
chr1	85497983
chr1	85514850
chr1	85946746
chr1	86634555
chr1	86942983
chr1	87152585
chr1	87283324
chr1	88922545
chr1	89129898
chr1	89231201
chr1	89437288
chr1	89721609
chr1	89762497
chr1	89849081
chr1	89865173
chr1	89871170
chr1	89896227
chr1	90001328
chr1	90109297
chr1	90233283
chr1	91260410
chr1	91625498
chr1	91794461
chr1	92043051
chr1	92124230
chr1	92186775
chr1	92537157
chr1	92775264
chr1	93070098
chr1	93097402
chr1	93121188
chr1	93200814
chr1	93219631
chr1	93267630
chr1	93280720
chr1	93317323
chr1	93418760
chr1	93584007
chr1	94085705
chr1	94117397
chr1	94147783
chr1	94656383
chr1	95201211
chr1	95216654
chr1	95311091
chr1	95472372
chr1	96959911
chr1	99035844
chr1	99109887
chr1	100088217
chr1	100208144
chr1	100277005
chr1	100371136
chr1	100488052
chr1	100504357
chr1	100638723
chr1	100678456
chr1	100683905
chr1	100690942
chr1	101134277
chr1	101165674
chr1	101187872
chr1	101350384
chr1	101496218
chr1	101526816
chr1	101530001
chr1	101547828
chr1	103841142
chr1	103965323
chr1	107914630
chr1	108130716
chr1	108423948
chr1	108469873
chr1	108544499
chr1	108904042
chr1	108935359
chr1	108991165
chr1	109005210
chr1	109036920
chr1	109090687
chr1	109172454
chr1	109307464
chr1	109386244
chr1	109420149
chr1	109434868
chr1	109444213
chr1	109458201
chr1	109627673
chr1	109770811
chr1	109828149
chr1	109838162
chr1	109846895
chr1	109892746
chr1	109965183
chr1	109984509
chr1	110084471
chr1	110135141
chr1	110146554
chr1	110328837
chr1	110378681
chr1	110547347
chr1	110554332
chr1	110683149
chr1	110751886
chr1	110804599
chr1	110963665
chr1	110975642
chr1	110991546
chr1	111016393
chr1	111131503
chr1	111217239
chr1	111225296
chr1	111308076
chr1	111548134
chr1	111560364
chr1	111566063
chr1	111690761
chr1	111750391
chr1	111785928
chr1	111793502
chr1	111815363
chr1	111937265
chr1	111948364
chr1	111960642
chr1	112099688
chr1	112735161
chr1	112963939
chr1	113300513
chr1	113417182
chr1	113491124
chr1	114156580
chr1	114215930
chr1	114249387
chr1	114273654
chr1	114685653
chr1	114690851
chr1	114855367
chr1	114925926
chr1	115060930
chr1	115102206
chr1	115124871
chr1	115407041
chr1	115443647
chr1	115457174
chr1	116483361
chr1	116496326
chr1	116512707
chr1	116670231
chr1	116690174
chr1	116717337
chr1	116762797
chr1	116848705
chr1	116859393
chr1	116900907
chr1	117081879
chr1	117098478
chr1	117107635
chr1	117113983
chr1	117160793
chr1	117222299
chr1	117331521
chr1	117404438
chr1	117949862
chr1	118000548
chr1	118003056
chr1	118008621
chr1	118103144
chr1	118273954
chr1	119484840
chr1	121053527
chr1	121083768
chr1	121130840
chr1	121136972
chr1	121175476
chr1	121186501
chr1	141477446
chr1	141501144
chr1	141832562
chr1	142124265
chr1	142730268
chr1	143231505
chr1	143245181
chr1	143646926
chr1	143770481
chr1	143807747
chr1	143920388
chr1	143988829
chr1	144093812
chr1	144108312
chr1	144138959
chr1	144146611
chr1	144149006
chr1	144181865
chr1	144218885
chr1	144227628
chr1	144322309
chr1	145110701
chr1	145180918
chr1	145479516
chr1	145483674
chr1	145609313
chr1	146273484
chr1	146460535
chr1	146608159
chr1	146818494
chr1	147302023
chr1	147490553
chr1	148050535
chr1	148124924
chr1	148166408
chr1	148306438
chr1	148390350
chr1	148452606
chr1	148475053
chr1	148508045
chr1	148532845
chr1	148560599
chr1	148581061
chr1	148603291
chr1	148726574
chr1	148802704
chr1	148850809
chr1	148868720
chr1	148936402
chr1	149115755
chr1	149165389
chr1	149218745
chr1	149247544
chr1	149263834
chr1	149298755
chr1	149309684
chr1	149405142
chr1	149429323
chr1	149437542
chr1	149493769
chr1	149520405
chr1	149566814
chr1	149586622
chr1	149638617
chr1	149698608
chr1	149851019
chr1	150029626
chr1	150137918
chr1	150173323
chr1	150185010
chr1	150274369
chr1	150287346
chr1	151775341
chr1	151784262
chr1	151873158
chr1	151897865
chr1	151910102
chr1	151967017
chr1	152022582
chr1	152044584
chr1	152162389
chr1	152197785
chr1	152206371
chr1	152216781
chr1	152226060
chr1	152229835
chr1	152397030
chr1	152421312
chr1	152459849
chr1	152511645
chr1	152563881
chr1	152574281
chr1	152644227
chr1	152702986
chr1	152798048
chr1	152847340
chr1	152867135
chr1	152999631
chr1	153024243
chr1	153030477
chr1	153176441
chr1	153194427
chr1	153200833
chr1	153213665
chr1	153222361
chr1	153256795
chr1	153374821
chr1	153379691
chr1	153412472
chr1	153430925
chr1	153445046
chr1	153463857
chr1	153481251
chr1	153487297
chr1	153491935
chr1	153498782
chr1	153510007
chr1	153513743
chr1	153545141
chr1	153559875
chr1	153772940
chr1	153799560
chr1	153846574
chr1	153925087
chr1	153981906
chr1	154093712
chr1	154170929
chr1	154225981
chr1	154257388
chr1	154291125
chr1	154333649
chr1	154342841
chr1	154363745
chr1	154430437
chr1	154453085
chr1	154519326
chr1	154532129
chr1	154574711
chr1	154693102
chr1	154717334
chr1	154741499
chr1	154837917
chr1	154844682
chr1	154896544
chr1	154965265
chr1	154977749
chr1	154988336
chr1	155003764
chr1	155053271
chr1	155374938
chr1	156586569
chr1	158017116
chr1	158128197
chr1	158147025
chr1	158160247
chr1	158182220
chr1	158268432
chr1	158322206
chr1	158335017
chr1	158498946
chr1	158521573
chr1	158579749
chr1	158759625
chr1	158776795
chr1	158843709
chr1	158865866
chr1	158918117
chr1	159032536
chr1	159074071
chr1	159275413
chr1	159282449
chr1	159306402
chr1	159334202
chr1	159354477
chr1	159369170
chr1	159390541
chr1	159395877
chr1	159402704
chr1	159413795
chr1	159421870
chr1	159438764
chr1	159462390
chr1	159542633
chr1	159550761
chr1	159636186
chr1	159760347
chr1	159767599
chr1	159776646
chr1	159849136
chr1	159975664
chr1	159986135
chr1	160002687
chr1	160734208
chr1	160797866
chr1	161558243
chr1	162896507
chr1	163603428
chr1	163629013
chr1	163837727
chr1	163866684
chr1	164004802
chr1	165075212
chr1	165112203
chr1	165326772
chr1	165389965
chr1	165456496
chr1	165683738
chr1	165696851
chr1	165710293
chr1	165725676
chr1	165728405
chr1	165789598
chr1	165864138
chr1	165873413
chr1	165951504
chr1	166039377
chr1	166172087
chr1	166414714
chr1	166578727
chr1	167603764
chr1	167721983
chr1	167840846
chr1	167928764
chr1	167947995
chr1	168030731
chr1	168130038
chr1	168310556
chr1	168449633
chr1	169549856
chr1	169721218
chr1	169977855
chr1	170017110
chr1	170077128
chr1	170616651
chr1	170768741
chr1	170874914
chr1	170898621
chr1	170906684
chr1	170935150
chr1	170944383
chr1	171074334
chr1	171712506
chr1	171784123
chr1	171786880
chr1	171950728
chr1	172060211
chr1	172104139
chr1	172395230
chr1	172409709
chr1	173035581
chr1	173201091
chr1	173204661
chr1	173235434
chr1	173259323
chr1	173265672
chr1	173445052
chr1	173462375
chr1	173555569
chr1	174443478
chr1	176778415
chr1	177316876
chr1	177601756
chr1	177945846
chr1	178050745
chr1	178113643
chr1	178118463
chr1	178190454
chr1	178390668
chr1	178738681
chr1	178867704
chr1	179258593
chr1	179324450
chr1	179385545
chr1	179632006
chr1	179660875
chr1	180265665
chr1	180324056
chr1	180465894
chr1	180495191
chr1	180840116
chr1	180851978
chr1	180865690
chr1	181025407
chr1	181074927
chr1	181708044
chr1	181871336
chr1	182152061
chr1	182192518
chr1	182287438
chr1	182981831
chr1	182990926
chr1	183076519
chr1	183126457
chr1	183392869
chr1	183553275
chr1	183802919
chr1	183910177
chr1	184611166
chr1	190752734
chr1	190774877
chr1	190811444
chr1	191044592
chr1	191295175
chr1	191357694
chr1	191715259
chr1	192525502
chr1	195382486
chr1	195437237
chr1	196011161
chr1	196104985
chr1	196424070
chr1	196792823
chr1	196857070
chr1	196892607
chr1	196917749
chr1	197170900
chr1	198390069
chr1	198766472
chr1	198856742
chr1	198905332
chr1	199124195
chr1	199141656
chr1	199255435
chr1	199350136
chr1	200064834
chr1	200131864
chr1	200191235
chr1	200400694
chr1	200531463
chr1	200577782
chr1	200584264
chr1	201124916
chr1	201163028
chr1	201194097
chr1	201243098
chr1	201508983
chr1	201523333
chr1	201525455
chr1	201526278
chr1	201541313
chr1	201556807
chr1	201560061
chr1	201563639
chr1	201576028
chr1	201843155
chr1	201861620
chr1	201910010
chr1	201918567
chr1	202000849
chr1	202031300
chr1	202097304
chr1	202156376
chr1	202443032
chr1	202599127
chr1	202647671
chr1	202689076
chr1	202742279
chr1	202742881
chr1	202752127
chr1	202757172
chr1	202780241
chr1	203358063
chr1	203447492
chr1	203509399
chr1	203524187
chr1	203557146
chr1	203827814
chr1	203866994
chr1	203867821
chr1	203985331
chr1	203985986
chr1	204010870
chr1	204048852
chr1	204730796
chr1	204792044
chr1	204797175
chr1	204803183
chr1	204815408
chr1	204820132
chr1	204830246
chr1	204852458
chr1	204875422
chr1	204943749
chr1	204974720
chr1	204998068
chr1	205006502
chr1	205043398
chr1	205162009
chr1	205163228
chr1	205291020
chr1	205292951
chr1	205561405
chr1	205991960
chr1	206063991
chr1	206065996
chr1	206109180
chr1	207987769
chr1	207996112
chr1	208009563
chr1	208024590
chr1	208067923
chr1	208551326
chr1	209439631
chr1	209499061
chr1	209622777
chr1	209755573
chr1	209819175
chr1	209915715
chr1	210073678
chr1	210275662
chr1	210465523
chr1	210525025
chr1	210654831
chr1	210799019
chr1	210905409
chr1	211031817
chr1	211098142
chr1	211255808
chr1	211291139
chr1	211910443
chr1	211968604
chr1	212521194
chr1	212668021
chr1	212811245
chr1	212842985
chr1	215033465
chr1	215871017
chr1	216525268
chr1	217413830
chr1	218286512
chr1	218329886
chr1	218334008
chr1	218512513
chr1	219948228
chr1	219953245
chr1	219982352
chr1	220079972
chr1	220589427
chr1	220660741
chr1	220829842
chr1	220857739
chr1	220874593
chr1	220884143
chr1	220895018
chr1	220953422
chr1	221055056
chr1	221321496
chr1	221373799
chr1	221488943
chr1	221980969
chr1	222100525
chr1	222246968
chr1	222368403
chr1	222423482
chr1	222436946
chr1	222584722
chr1	222611126
chr1	222768288
chr1	222878340
chr1	223682356
chr1	223699405
chr1	223722149
chr1	223729435
chr1	224032004
chr1	224120640
chr1	224151635
chr1	224178576
chr1	224253933
chr1	224256575
chr1	224376256
chr1	224441073
chr1	224563522
chr1	224662409
chr1	224699562
chr1	224907916
chr1	224911090
chr1	224917404
chr1	224929533
chr1	224944977
chr1	224957982
chr1	224993812
chr1	225082563
chr1	225124772
chr1	225194039
chr1	225797101
chr1	225989671
chr1	226016988
chr1	226020841
chr1	226028703
chr1	226313714
chr1	226336902
chr1	226357756
chr1	226363634
chr1	226394405
chr1	226420430
chr1	226440130
chr1	226467960
chr1	226530262
chr1	226661160
chr1	226712212
chr1	226719209
chr1	226741181
chr1	227545414
chr1	227710719
chr1	227761454
chr1	227813862
chr1	227828540
chr1	228269480
chr1	228844736
chr1	229175355
chr1	229179884
chr1	229181371
chr1	229413894
chr1	229540590
chr1	229624982
chr1	229730919
chr1	229829048
chr1	231007730
chr1	231126492
chr1	231220710
chr1	232575839
chr1	232611273
chr1	232680629
chr1	232927046
chr1	232933695
chr1	232961396
chr1	232974860
chr1	233047834
chr1	233165833
chr1	233214468
chr1	233313777
chr1	233358959
chr1	233391338
chr1	233527708
chr1	233558323
chr1	233734608
chr1	233872414
chr1	234096792
chr1	234229504
chr1	234296942
chr1	234327299
chr1	234512092
chr1	234646357
chr1	234753890
chr1	234834502
chr1	235025228
chr1	235833115
chr1	236173505
chr1	238128249
chr1	238806402
chr1	239749702
chr1	239870251
chr1	239907288
chr1	240078060
chr1	241027255
chr1	241331682
chr1	241484955
chr1	241724374
chr1	242080354
chr1	242278058
chr1	242304898
chr1	242529554
chr1	242682141
chr1	242691432
chr1	242882742
chr1	243064887
chr1	243094446
chr1	243199555
chr1	243608406
chr1	244347570
chr1	244737158
chr1	244796227
chr1	244929277
chr1	245161987
chr1	245308780
chr1	245334421
chr1	245620176
chr1	245637371
chr1	246167008
chr1	246634148
chr1	247087129
chr1	247099849
chr1	247119864
chr1	247134715
chr1	247167278
chr10	487032
chr10	506421
chr10	547123
chr10	967716
chr10	1024346
chr10	1084978
chr10	1092709
chr10	1146263
chr10	1380760
chr10	1971457
chr10	3204985
chr10	3817695
chr10	3837528
chr10	3906163
chr10	3920276
chr10	3981314
chr10	3993461
chr10	4092191
chr10	4163164
chr10	4770293
chr10	5323886
chr10	5349987
chr10	5596649
chr10	5766565
chr10	5767385
chr10	5857827
chr10	5895546
chr10	5972080
chr10	6096653
chr10	6133156
chr10	6150578
chr10	6165892
chr10	6168555
chr10	6170848
chr10	6227007
chr10	6246021
chr10	6255397
chr10	6284839
chr10	6357448
chr10	6382251
chr10	6430253
chr10	6464130
chr10	6492436
chr10	6555575
chr10	6580912
chr10	6612360
chr10	6625166
chr10	6675303
chr10	6689280
chr10	6748015
chr10	7009712
chr10	7128320
chr10	7203329
chr10	7351577
chr10	7566571
chr10	7870051
chr10	7900415
chr10	8136771
chr10	8265572
chr10	8414490
chr10	8486894
chr10	8498522
chr10	8980824
chr10	9092271
chr10	9178403
chr10	11231676
chr10	11245311
chr10	11260785
chr10	11485336
chr10	11766870
chr10	12125435
chr10	12150756
chr10	12211450
chr10	12263468
chr10	12277942
chr10	12431643
chr10	12530978
chr10	13243422
chr10	13384165
chr10	13668877
chr10	13800273
chr10	13869184
chr10	14098177
chr10	14267115
chr10	14468497
chr10	14589369
chr10	14654063
chr10	14665491
chr10	14669084
chr10	14730675
chr10	14920198
chr10	14960804
chr10	15036208
chr10	15042111
chr10	15179174
chr10	15251874
chr10	15290991
chr10	15942569
chr10	16518922
chr10	16869715
chr10	16899567
chr10	17085311
chr10	17105586
chr10	17109009
chr10	17111708
chr10	17283690
chr10	17288336
chr10	17298398
chr10	17312636
chr10	17508127
chr10	17510949
chr10	17726078
chr10	18980507
chr10	18988399
chr10	21824817
chr10	21863130
chr10	22070017
chr10	22093927
chr10	22332741
chr10	22351810
chr10	22558063
chr10	22645357
chr10	22765957
chr10	22940871
chr10	22959737
chr10	22995579
chr10	23011581
chr10	23767953
chr10	24952003
chr10	25053508
chr10	25211421
chr10	25216705
chr10	25223950
chr10	25345385
chr10	26664333
chr10	26777827
chr10	26797888
chr10	26803948
chr10	26811259
chr10	26816619
chr10	27011964
chr10	27026089
chr10	27190022
chr10	27429518
chr10	27483389
chr10	27484097
chr10	27571204
chr10	27572011
chr10	27586541
chr10	27833135
chr10	28632224
chr10	28663389
chr10	28664350
chr10	28697335
chr10	28861651
chr10	29006255
chr10	29988086
chr10	30010866
chr10	30327482
chr10	30356405
chr10	30678365
chr10	30743122
chr10	30858541
chr10	31030554
chr10	31112901
chr10	31361049
chr10	31647967
chr10	31650544
chr10	32089361
chr10	32585845
chr10	32661420
chr10	32675335
chr10	32742690
chr10	32775017
chr10	32788537
chr10	33309576
chr10	33339201
chr10	33446892
chr10	33455320
chr10	33468226
chr10	33577730
chr10	35323686
chr10	35340946
chr10	35350437
chr10	35419450
chr10	35456026
chr10	35478575
chr10	35524833
chr10	35776799
chr10	38186647
chr10	38305685
chr10	38339648
chr10	38423218
chr10	38731776
chr10	38844321
chr10	38912175
chr10	41675470
chr10	41685083
chr10	41727485
chr10	41762566
chr10	41765935
chr10	41794744
chr10	41857937
chr10	41862184
chr10	41864658
chr10	42137249
chr10	42368382
chr10	42454108
chr10	42598154
chr10	42953812
chr10	43102905
chr10	43147788
chr10	43164125
chr10	43177795
chr10	43224667
chr10	43235877
chr10	43252437
chr10	43267747
chr10	43271218
chr10	43389981
chr10	43464311
chr10	43631990
chr10	45285848
chr10	45410334
chr10	45488208
chr10	45542617
chr10	49184619
chr10	49534464
chr10	50417191
chr10	50581277
chr10	51173250
chr10	51235189
chr10	51497620
chr10	52054410
chr10	53129421
chr10	53645670
chr10	59698921
chr10	59779617
chr10	59815036
chr10	60141280
chr10	61336359
chr10	62158047
chr10	62208070
chr10	63180910
chr10	63332657
chr10	63422700
chr10	63481040
chr10	63613355
chr10	64062096
chr10	64067223
chr10	64162882
chr10	64234350
chr10	64246658
chr10	64562906
chr10	64655678
chr10	64699030
chr10	65471152
chr10	69193870
chr10	69279251
chr10	69314258
chr10	69505133
chr10	69761727
chr10	69837142
chr10	69901740
chr10	69957282
chr10	70150841
chr10	70330971
chr10	70385861
chr10	70418480
chr10	70475453
chr10	70519880
chr10	70553679
chr10	70609848
chr10	70822474
chr10	70838769
chr10	70855815
chr10	70937714
chr10	71069133
chr10	71448335
chr10	71561738
chr10	71576478
chr10	71600406
chr10	71663592
chr10	71833805
chr10	71907662
chr10	72008396
chr10	72245638
chr10	72310006
chr10	73157632
chr10	73178711
chr10	73186944
chr10	73203379
chr10	73363609
chr10	73478506
chr10	73518417
chr10	73645860
chr10	73678747
chr10	73691031
chr10	73703671
chr10	73715174
chr10	73727169
chr10	73749576
chr10	73761858
chr10	73764879
chr10	73784790
chr10	73794258
chr10	74055916
chr10	74526670
chr10	74597830
chr10	74677120
chr10	74682496
chr10	74788562
chr10	74925411
chr10	74925883
chr10	74959371
chr10	75055827
chr10	75160315
chr10	75173761
chr10	75199099
chr10	75202509
chr10	75211843
chr10	75215215
chr10	75241717
chr10	75279055
chr10	75305089
chr10	75309534
chr10	75316017
chr10	75370572
chr10	75421875
chr10	75427946
chr10	75580674
chr10	75606601
chr10	76019168
chr10	76256046
chr10	76541246
chr10	76617905
chr10	76640269
chr10	76660582
chr10	76665847
chr10	79266187
chr10	79459356
chr10	79463516
chr10	79733334
chr10	80498637
chr10	80747753
chr10	80753187
chr10	81829067
chr10	81937369
chr10	81955395
chr10	82194581
chr10	82215773
chr10	82238234
chr10	85889264
chr10	86080112
chr10	86083927
chr10	87362248
chr10	88149751
chr10	88162983
chr10	88271583
chr10	88286548
chr10	88460970
chr10	88689351
chr10	88700258
chr10	88716247
chr10	88721157
chr10	88834225
chr10	88844649
chr10	89568068
chr10	89612211
chr10	89814928
chr10	89841632
chr10	89943950
chr10	90135835
chr10	90740370
chr10	91001802
chr10	91083896
chr10	91451280
chr10	92080796
chr10	92607705
chr10	92913246
chr10	93160032
chr10	93548146
chr10	93673521
chr10	94040855
chr10	94341492
chr10	94342820
chr10	94598591
chr10	95126447
chr10	95452395
chr10	96112720
chr10	96295517
chr10	97311184
chr10	97443765
chr10	97582289
chr10	97840048
chr10	97879721
chr10	98336878
chr10	98551456
chr10	99042468
chr10	99068834
chr10	99084441
chr10	99151091
chr10	99175930
chr10	99195841
chr10	99248184
chr10	99390267
chr10	99437172
chr10	99481573
chr10	99486885
chr10	99884339
chr10	101180530
chr10	101370623
chr10	101481873
chr10	101935919
chr10	101979355
chr10	102017348
chr10	102036504
chr10	102183661
chr10	102285589
chr10	102633112
chr10	102663092
chr10	102782197
chr10	102792710
chr10	102810530
chr10	103103723
chr10	103568343
chr10	103580641
chr10	103806039
chr10	103815113
chr10	103870109
chr10	103882699
chr10	103902036
chr10	103995246
chr10	104144191
chr10	104149426
chr10	104170819
chr10	104182424
chr10	104200180
chr10	104211114
chr10	104228814
chr10	104253532
chr10	104362960
chr10	104391950
chr10	104424020
chr10	104464177
chr10	104493448
chr10	104604114
chr10	104667831
chr10	105117658
chr10	105118412
chr10	105146286
chr10	105221158
chr10	105428089
chr10	105462852
chr10	105660941
chr10	105667967
chr10	105871608
chr10	105982056
chr10	106018658
chr10	106041345
chr10	106058540
chr10	106071821
chr10	106078849
chr10	106088543
chr10	106103542
chr10	106685578
chr10	107421201
chr10	111665001
chr10	111673189
chr10	111683837
chr10	111760043
chr10	111906810
chr10	111975621
chr10	112054745
chr10	112106494
chr10	112164512
chr10	112247640
chr10	112317345
chr10	112421970
chr10	112500901
chr10	112533438
chr10	112552552
chr10	112610510
chr10	112614571
chr10	112618906
chr10	112622636
chr10	112669144
chr10	113933517
chr10	114196984
chr10	115429554
chr10	115711547
chr10	115924086
chr10	116249583
chr10	116276699
chr10	116288405
chr10	116290930
chr10	116294261
chr10	116523971
chr10	116687967
chr10	118924516
chr10	118966157
chr10	120091765
chr10	120448109
chr10	120504660
chr10	120816635
chr10	120830877
chr10	120840716
chr10	120881584
chr10	120928162
chr10	120957027
chr10	121018513
chr10	121051030
chr10	121056292
chr10	121166543
chr10	121251977
chr10	121346589
chr10	121622488
chr10	121642118
chr10	121759022
chr10	122600755
chr10	123677610
chr10	123724461
chr10	124124075
chr10	124265539
chr10	124629174
chr10	124703767
chr10	124730149
chr10	124758350
chr10	124882714
chr10	124903692
chr10	124991017
chr10	125909499
chr10	126067977
chr10	126097493
chr10	126315648
chr10	126326574
chr10	126336622
chr10	126357733
chr10	126396877
chr10	126470447
chr10	126480353
chr10	126595308
chr10	127398198
chr10	127502050
chr10	127720536
chr10	128982193
chr10	129699774
chr10	129735795
chr10	129751456
chr10	129814759
chr10	129838399
chr10	130723848
chr10	130746316
chr10	131798850
chr10	131824681
chr10	131878577
chr10	133780805
chr10	133995661
chr10	134111300
chr10	134116734
chr10	134201136
chr10	134922981
chr10	134938600
chr10	134972362
chr10	134993416
chr10	135000388
chr10	135036945
chr10	135057597
chr10	135350818
chr11	180121
chr11	197519
chr11	225976
chr11	226924
chr11	240948
chr11	259575
chr11	277936
chr11	346411
chr11	397105
chr11	440261
chr11	496839
chr11	508836
chr11	525594
chr11	545048
chr11	550675
chr11	558724
chr11	566234
chr11	578270
chr11	685299
chr11	718209
chr11	799937
chr11	810164
chr11	832824
chr11	915818
chr11	1240477
chr11	1287534
chr11	1367518
chr11	1567224
chr11	1815738
chr11	1830760
chr11	1925120
chr11	2378225
chr11	2420607
chr11	2970197
chr11	2992279
chr11	3035278
chr11	3357037
chr11	3763202
chr11	3775558
chr11	3819323
chr11	3832854
chr11	3925093
chr11	4072579
chr11	4371529
chr11	4586018
chr11	4614841
chr11	6212538
chr11	6368236
chr11	6380674
chr11	6396959
chr11	6459230
chr11	6581465
chr11	6590227
chr11	6597269
chr11	6661197
chr11	6711675
chr11	7965216
chr11	8147142
chr11	8660851
chr11	8667167
chr11	8942347
chr11	9116134
chr11	9228527
chr11	9292693
chr11	9342620
chr11	9362738
chr11	9438821
chr11	9551666
chr11	9592309
chr11	9736331
chr11	10437509
chr11	10486072
chr11	10487447
chr11	10519323
chr11	10729407
chr11	10787069
chr11	10835941
chr11	11127933
chr11	11134668
chr11	11820045
chr11	12174064
chr11	12202876
chr11	13255959
chr11	13441426
chr11	13646494
chr11	13750827
chr11	13847396
chr11	13918851
chr11	14053378
chr11	14477952
chr11	14498531
[truncated: 10,961 more rows]
